# Supplementary material for: Enhancing CO2 reduction through the catalytic effect of a novel silicon haeckelite-inspired 2D material
Source: Royal Society of Chemistry journal article supplement (doi:10.1039/d3cp02783j), 2023-01-01
Supplement: d3cp02783j1.pdf [file d3cp02783j1.pdf]

## Supporting information

### **Enhancing CO<sub>2</sub> reduction through the catalytic effect of a novel silicon haeckelite-inspired 2D material**

Wilmer Esteban Vallejo Narváez,\* Cesar Gabriel Vera de la Garza and Serguei Fomine\*

Instituto de Investigaciones en Materiales, Universidad Nacional Autónoma de México, Apartado Postal 70-360, CU, Coyoacán, México DF 04510, México.

e-mail: [wilmevall@comunidad.unam.mx](mailto:wilmevall@comunidad.unam.mx), [fomine@unam.mx](mailto:fomine@unam.mx)

## Table of Contents

|                                                |   |
|------------------------------------------------|---|
| 1. NBO analysis.....                           | 3 |
| 2. Hydrogen absorption on Hck.....             | 4 |
| 3. XYZ coordinates .....                       | 5 |
| 3.1 Mechanism with catalyst (Hck biflake)..... | 5 |

## 1. NBO analysis

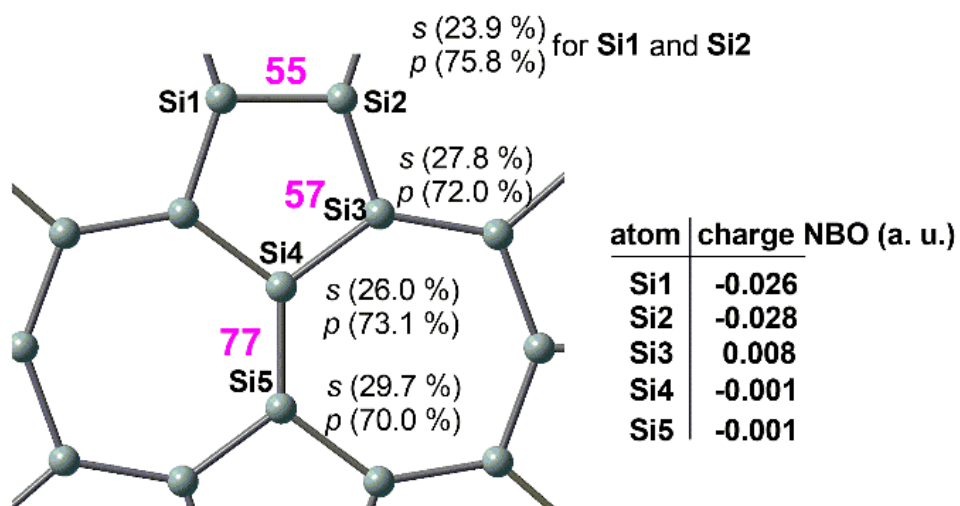

**Fig. S1.** Percentage of occupation of *s* and *p* orbitals and charges from NBO calculations.

## 2. Hydrogen absorption on Hck

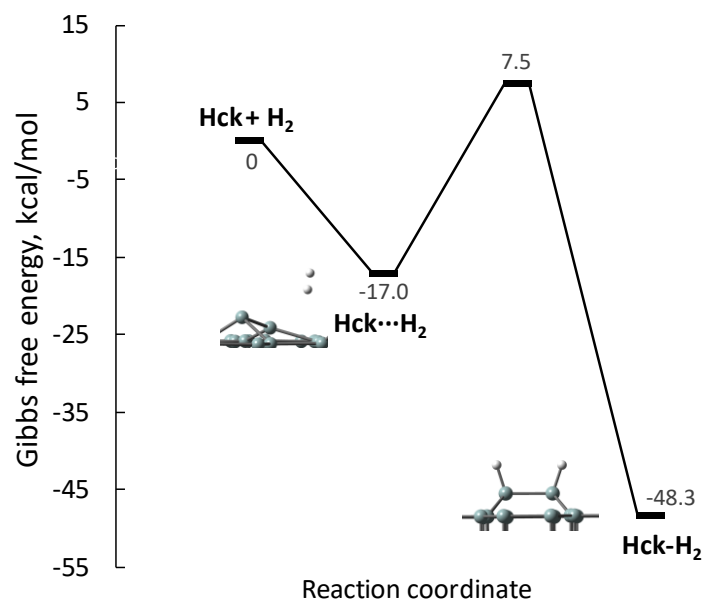

**Fig. S2** Calculated energy profile of H<sub>2</sub> chemisorption on **Hck**. This profile corresponds to the addition of H<sub>2</sub> molecule on **55** position in **Hck**.

### 3. XYZ coordinates

#### 3.1 Mechanism with catalyst (Hck biflake)

- **H<sub>2</sub>**

|   |                    |                    |                   |
|---|--------------------|--------------------|-------------------|
| H | 0.0000000000000000 | 0.0000000000000000 | 0.37864129793633  |
| H | 0.0000000000000000 | 0.0000000000000000 | -0.37864129793633 |

- **H<sub>2</sub>O**

|   |                    |                   |                   |
|---|--------------------|-------------------|-------------------|
| O | 0.0000000000000000 | 0.00000000001365  | 0.12224060626212  |
| H | 0.0000000000000000 | 0.75884092207211  | -0.48857330312557 |
| H | 0.0000000000000000 | -0.75884092208576 | -0.48857330313655 |

- **CO<sub>2</sub>**

|   |                   |                   |                   |
|---|-------------------|-------------------|-------------------|
| C | 0.00000000003877  | -0.00000000000811 | 0.00000000034625  |
| O | -0.00000000001938 | 0.00000000000406  | 1.17218860700206  |
| O | -0.00000000001938 | 0.00000000000406  | -1.17218860734831 |

- **CO**

|   |                   |                  |                  |
|---|-------------------|------------------|------------------|
| O | 0.72386859160196  | 1.41630899000000 | 0.00000000000000 |
| C | -0.41574507160196 | 1.41630899000000 | 0.00000000000000 |

- 

- **OCH<sub>2</sub>**

|   |                   |                   |                   |
|---|-------------------|-------------------|-------------------|
| C | -0.96315130632712 | 0.19313304230275  | 0.00000016130101  |
| O | -2.17147777496584 | 0.19313304104021  | -0.00000005387991 |
| H | -0.35778533121110 | 1.13974786524547  | -0.00000005371055 |
| H | -0.35778532749594 | -0.75348177858843 | -0.00000005371055 |

- **HCOOH**

|   |                   |                  |                   |
|---|-------------------|------------------|-------------------|
| C | -2.56625246748834 | 1.26938855444683 | -0.00000013224816 |
| H | -1.93379358788267 | 0.35474618035934 | 0.00000006501346  |
| O | -3.77405473013434 | 1.29087521951131 | 0.00000003731286  |
| O | -1.76905832553729 | 2.36013874680273 | -0.0000000336594  |
| H | -2.36664896895735 | 3.14015120887979 | 0.00000003328778  |

- **CH<sub>3</sub>OH**

|   |                   |                  |                   |
|---|-------------------|------------------|-------------------|
| C | -1.27728454145703 | 1.48779440557192 | 0.01547922362659  |
| H | -0.90383140730846 | 0.45006217043377 | 0.02693716166122  |
| H | -0.91897691224943 | 1.96518289895033 | -0.92247172536452 |
| H | -2.38762161963671 | 1.44669334912690 | -0.02275987825884 |
| O | -0.78405557728129 | 2.11935654884887 | 1.18426808084891  |
| H | -1.11083601206709 | 3.03576316706821 | 1.17962423748663  |

- **CH<sub>4</sub>**

|   |                   |                  |                   |
|---|-------------------|------------------|-------------------|
| C | -5.61678135628583 | 3.93092889385665 | -0.00000000028776 |
| H | -5.24949026675156 | 2.89204824128707 | 0.00000000021861  |
| H | -5.24947095693913 | 4.45034751626118 | 0.89969414926280  |
| H | -5.24947095611715 | 4.45034751680583 | -0.89969414976895 |
| H | -6.71866805390632 | 3.93093235178927 | 0.00000000057529  |

- **Hck**

|    |                   |                   |                  |
|----|-------------------|-------------------|------------------|
| Si | 27.08323114688093 | 2.43721144301190  | 3.28018966612543 |
| Si | 26.98463681222304 | -2.18965399925175 | 3.51018307774085 |
| Si | 29.33599504487624 | 3.05847096180957  | 3.57302441139720 |
| Si | 29.21199614360422 | -2.86912415391675 | 3.86697839372672 |
| Si | 30.88847727515454 | 1.27179966701058  | 3.88814561166848 |
| Si | 19.16495296061406 | -0.93698808099016 | 2.25311169833263 |
| Si | 21.13177502980807 | 2.80486739294699  | 2.35472752606264 |
| Si | 21.01842677418641 | -2.38340616426839 | 2.61559543807146 |
| Si | 23.40238377220203 | 2.37739311701166  | 2.71933166389682 |
| Si | 23.30674359838321 | -2.02559817031376 | 2.94083886539168 |
| Si | 25.21795557774789 | 3.90846658195869  | 2.89843621096469 |
| Si | 25.00656720709572 | -5.99706455015025 | 3.39771675024925 |
| Si | 24.16147202240585 | 0.16346222321048  | 2.93348631376096 |
| Si | 25.28078201797687 | 6.29742068240895  | 2.78181493471139 |
| Si | 25.05528545958131 | -3.60834951367248 | 3.27570086937244 |
| Si | 26.47611475340315 | 0.13141026005426  | 3.30483422364042 |
| Si | 18.99988711378175 | -8.27914106199610 | 2.61189969495890 |
| Si | 17.14322829525011 | -6.79346946974393 | 2.25460876303334 |
| Si | 14.87173915994319 | -7.41846497632571 | 1.93902357565933 |
| Si | 13.10372036769452 | -5.82153041674547 | 1.58544265363602 |
| Si | 13.16659499050402 | -3.43310760309164 | 1.46379694953532 |
| Si | 11.29666355384375 | -1.96035950943745 | 1.11558375645406 |
| Si | 9.04827778835077  | -2.58426133918582 | 0.79565569703070 |
| Si | 7.50120924214917  | -0.79800326558992 | 0.45635439396254 |
| Si | 7.55366083218502  | 1.59842845428703  | 0.33767409115952 |

|    |                   |                   |                  |
|----|-------------------|-------------------|------------------|
| Si | 9.17385792263315  | 3.34431474357840  | 0.50162105451629 |
| Si | 11.39656160312041 | 2.66660346275383  | 0.88505774964336 |
| Si | 11.90460473253789 | 0.34577326040823  | 1.07947423112057 |
| Si | 14.22304048855918 | 0.31329909990856  | 1.43330409041046 |
| Si | 15.07371951481186 | 2.50359442242823  | 1.45203234305748 |
| Si | 13.32962199027637 | 4.08368089973527  | 1.08631929113007 |
| Si | 13.37788807043909 | 6.47266646905091  | 0.96909967414998 |
| Si | 15.21728312082641 | 8.01468477063018  | 1.16502107065528 |
| Si | 17.46040233323128 | 7.32750393436841  | 1.54575069617893 |
| Si | 19.38270353519372 | 8.75579564031750  | 1.75661265386560 |
| Si | 21.23969067982867 | 7.27263838649541  | 2.12420433510447 |
| Si | 20.46050283080272 | 5.04487387585301  | 2.12165906896645 |
| Si | 18.14261968125154 | 5.07833658275951  | 1.75948036450005 |
| Si | 17.36168888908528 | 2.86217923282711  | 1.77909444520807 |
| Si | 19.21511464480976 | 1.41411484607127  | 2.13408557064603 |
| Si | 23.51316409027911 | 7.89511873222935  | 2.42904769002586 |
| Si | 30.83674180034884 | -1.12465891489875 | 4.00659372475937 |
| Si | 23.16677704153769 | -7.53899729953977 | 3.20234935917062 |
| Si | 20.92166383598394 | -6.85047817051257 | 2.83240805944795 |
| Si | 20.24191880944430 | -4.60073858608778 | 2.60656583949137 |
| Si | 17.92410347905197 | -4.56625038352996 | 2.24400245875545 |
| Si | 17.24708172177122 | -2.32598160966884 | 2.03866380008688 |
| Si | 14.97633730225176 | -1.89970759701794 | 1.67234762789478 |
| H  | 29.64474889183680 | 4.26496118575864  | 4.40570742045531 |
| H  | 29.47373178741662 | -3.99928110423585 | 4.81488851948336 |
| H  | 32.02420496449229 | 1.73284152697883  | 4.75504865762694 |
| H  | 26.03633111903000 | -6.57047908117717 | 4.32714745465410 |
| H  | 26.33722277968209 | 6.91332278742666  | 3.65223977514256 |
| H  | 18.84205611002008 | -9.45704613737773 | 3.52484566791400 |
| H  | 14.36539150443395 | -8.59107821724568 | 2.72481754412450 |
| H  | 11.82798599314410 | -6.35941793793699 | 2.16533284497716 |
| H  | 8.49041711019978  | -3.70459366249073 | 1.61891808411369 |
| H  | 6.15312529381352  | -1.18340615504077 | 0.99303263587943 |
| H  | 6.22457873171118  | 2.09309089623687  | 0.83058439191146 |
| H  | 8.66315430063376  | 4.56258989006677  | 1.20810692560132 |
| H  | 12.12987942273548 | 7.12514225615205  | 1.48852173927036 |
| H  | 14.76609379230095 | 9.28248977331856  | 1.82685548136361 |
| H  | 19.28099588404277 | 10.02563559071540 | 2.54594591954036 |
| H  | 23.78394875703244 | 9.15182508259289  | 3.20121361953841 |
| H  | 31.95614889002926 | -1.54409419025944 | 4.91490916502153 |
| H  | 23.38426155790723 | -8.72354548312983 | 4.09590723125604 |
| Si | 27.44734343155409 | 2.30875489718707  | 0.87351410755236 |
| Si | 27.34766638537920 | -2.31755562697634 | 1.10358786549897 |
| Si | 29.69573222044720 | 2.93332852479075  | 1.19155457872295 |

|                      |                   |                   |
|----------------------|-------------------|-------------------|
| Si 29.57095179288539 | -2.99398045042034 | 1.48550358947636  |
| Si 31.24393606046259 | 1.14826017355886  | 1.53176761683887  |
| Si 19.52937940639471 | -1.06488606574525 | -0.14615080485081 |
| Si 21.49695159978420 | 2.67543336056008  | -0.05003642977597 |
| Si 21.38236353822923 | -2.51337638461203 | 0.20937871983466  |
| Si 23.76767232406030 | 2.24877416879732  | 0.31607629304366  |
| Si 23.67027923666385 | -2.15479608732256 | 0.53646752278970  |
| Si 25.57785295894866 | 3.78163885533811  | 0.52488747411716  |
| Si 25.36664569794761 | -6.12340752539417 | 1.01946167812858  |
| Si 24.52111311173861 | 0.03553725997244  | 0.55356782658657  |
| Si 25.64081949583889 | 6.16993195115350  | 0.40354243225348  |
| Si 25.41475966167561 | -3.73449479622284 | 0.90216478731027  |
| Si 26.83917783383074 | 0.00297053072572  | 0.90987061526332  |
| Si 19.36144142580379 | -8.40564708765271 | 0.23073170005449  |
| Si 17.50377557573451 | -6.92313146069318 | -0.13501086103967 |
| Si 15.23082079925089 | -7.54655637050400 | -0.44061579950769 |
| Si 13.46330749684491 | -5.94871811642789 | -0.79288046681646 |
| Si 13.52660490382354 | -3.55976601121793 | -0.90974855793119 |
| Si 11.66129318201149 | -2.08849145211027 | -1.29092872762313 |
| Si 9.40839792753136  | -2.70812559638124 | -1.58586665764538 |
| Si 7.85556532378241  | -0.92167804385740 | -1.90013549674123 |
| Si 7.90717925390891  | 1.47477024135242  | -2.01879877906552 |
| Si 9.53325256427788  | 3.21796942847193  | -1.87981564352045 |
| Si 11.76016825892993 | 2.53831613150676  | -1.52118150823137 |
| Si 12.26860815360024 | 0.21728491536840  | -1.31540388919726 |
| Si 14.58366445310865 | 0.18529724940919  | -0.94635714079311 |
| Si 15.43761952815322 | 2.37444823587670  | -0.95245039552576 |
| Si 13.68927305541784 | 3.95732286219888  | -1.28722519837295 |
| Si 13.73761583734976 | 6.34598136799879  | -1.40915712313792 |
| Si 15.57720997832176 | 7.88806056801612  | -1.21438670128376 |
| Si 17.82205435529706 | 7.19966208373363  | -0.84312588420015 |
| Si 19.74440380590523 | 8.62751321912656  | -0.62452017972165 |
| Si 21.60067598373287 | 7.14205180205341  | -0.26492518238779 |
| Si 20.81898646336860 | 4.91536098382307  | -0.25507745445388 |
| Si 18.50088430571450 | 4.94976715631641  | -0.61709912073072 |
| Si 17.72590776921739 | 2.73197605483916  | -0.62697669326017 |
| Si 19.57957509317371 | 1.28604379317414  | -0.26531199270546 |
| Si 23.87257804380157 | 7.76619660034540  | 0.04937942994349  |
| Si 31.19119861011910 | -1.24820626984753 | 1.65028072132790  |
| Si 23.52683798725630 | -7.66469247128209 | 0.82292139908479  |
| Si 21.28356454472255 | -6.97737147865165 | 0.44363021848492  |
| Si 20.60015964557895 | -4.72891816137894 | 0.22974497617266  |
| Si 18.28229846067462 | -4.69536938237952 | -0.13243624575142 |
| Si 17.61255280728042 | -2.45523155907366 | -0.36624526276991 |



|    |                   |                   |                   |
|----|-------------------|-------------------|-------------------|
| Si | 15.34198753537946 | -2.02853096205283 | -0.73094979624191 |
| H  | 30.25198345351891 | 4.05413975444216  | 0.36789462065603  |
| H  | 30.08148074097840 | -4.21232316455301 | 0.77902590798650  |
| H  | 32.59177414683449 | 1.53326183703471  | 0.99424317191693  |
| H  | 26.61448394239190 | -6.77576452682692 | 0.49949813705657  |
| H  | 26.91643158771334 | 6.70797078587032  | -0.17647273746292 |
| H  | 19.46318602365771 | -9.67594902351650 | -0.55781341678116 |
| H  | 14.96076912452921 | -8.80315024931254 | -1.21317759770423 |
| H  | 12.40686520311772 | -6.56423994425675 | -1.66356920521397 |
| H  | 9.10003083623929  | -3.91477640653327 | -2.41843523806690 |
| H  | 6.72002882072609  | -1.38250629576248 | -2.76738761971801 |
| H  | 6.78835988973206  | 1.89383203708176  | -2.92797312811737 |
| H  | 9.27303910985761  | 4.34820043550062  | -2.82804114620211 |
| H  | 12.70774672902687 | 6.91917428277420  | -2.33860828866575 |
| H  | 15.36015855019966 | 9.07239404008018  | -2.10829869684964 |
| H  | 19.90213001674566 | 9.80605906676024  | -1.53661033957404 |
| H  | 24.37828357120548 | 8.93901132003928  | -0.73650875393744 |
| H  | 32.52022931432683 | -1.74244798926979 | 1.15683348582087  |
| H  | 23.97701910588926 | -8.93262134258534 | 0.16066777845139  |

- **55 (CO<sub>2</sub> absorbed)**

|    |                   |                   |                  |
|----|-------------------|-------------------|------------------|
| Si | 27.35222470348080 | 2.35665506734721  | 2.49890646120138 |
| Si | 27.25393224235510 | -2.25948939383622 | 2.74236929121764 |
| Si | 29.60839737372243 | 2.96050740025893  | 2.80560327742977 |
| Si | 29.47478741548984 | -2.95231046755750 | 3.11138863589338 |
| Si | 31.16221406090076 | 1.17665348140867  | 3.12606943015698 |
| Si | 19.47810984505633 | -1.08218530896277 | 1.46304398356395 |
| Si | 21.42831599404147 | 2.71578593918908  | 1.57320557263495 |
| Si | 21.28945774917922 | -2.55985325948135 | 1.87471282229661 |
| Si | 23.69638383762276 | 2.31119114973882  | 1.94759015200863 |
| Si | 23.57307984893087 | -2.11570721896970 | 2.16893959796407 |
| Si | 25.50651438835910 | 3.85054468824858  | 2.12101171073784 |
| Si | 25.30988157964161 | -6.05249393952044 | 2.65599275471359 |
| Si | 24.40084577657650 | 0.09014067567802  | 2.20427197318927 |
| Si | 25.62114220204885 | 6.23727460321802  | 1.99980240742458 |
| Si | 25.33250372827929 | -3.67770113300083 | 2.52579216876290 |
| Si | 26.72691585297437 | 0.05371566116089  | 2.52424169566289 |
| Si | 19.32656882338763 | -8.07089589570671 | 1.79168521914920 |
| Si | 17.59109544428827 | -6.46958830179724 | 1.43614915261063 |
| Si | 15.39508936545414 | -7.32674853586645 | 1.19678614036985 |
| Si | 13.54420324571517 | -5.83959500952478 | 0.84072814589086 |
| Si | 13.64796423929981 | -3.46129244788655 | 0.70995581033506 |
| Si | 11.76836917034409 | -2.01723556393713 | 0.35108440926950 |

|                      |                   |                   |
|----------------------|-------------------|-------------------|
| Si 9.53286775084364  | -2.68877661807133 | 0.04266033063721  |
| Si 7.95552502884702  | -0.93194365606989 | -0.30983434566715 |
| Si 7.98748718145138  | 1.46348148762605  | -0.44435342250650 |
| Si 9.58894992475445  | 3.22711242525475  | -0.29185065556288 |
| Si 11.82763191111792 | 2.59934003015425  | 0.08857816479081  |
| Si 12.36875696726584 | 0.28684751566166  | 0.30149752208898  |
| Si 14.68367182855549 | 0.27352001565503  | 0.70323826267838  |
| Si 15.47058576890736 | 2.48214874806657  | 0.65496403444713  |
| Si 13.72759607111914 | 4.05855134599626  | 0.28390075915821  |
| Si 13.75575625626850 | 6.44646846564694  | 0.14899408485844  |
| Si 15.60128772640082 | 7.97838321709001  | 0.34159431014640  |
| Si 17.83636410701081 | 7.27196084151543  | 0.73143511708978  |
| Si 19.75781537117492 | 8.69849711545445  | 0.94367879791123  |
| Si 21.60301756386746 | 7.20905260819437  | 1.32848512706771  |
| Si 20.82893883876082 | 4.97766375484175  | 1.34056278933876  |
| Si 18.52097314671568 | 5.02386778759272  | 0.95289712873208  |
| Si 17.75569013596707 | 2.80406818888776  | 0.98669840783760  |
| Si 19.54239208321470 | 1.27418799385270  | 1.35445366749358  |
| Si 23.86954666744338 | 7.84694986267431  | 1.63409860922815  |
| Si 31.11009669336914 | -1.21871365886872 | 3.24937706870199  |
| Si 23.37821817952951 | -7.45431059458137 | 2.43932202120796  |
| Si 21.20313169131120 | -6.61560596802486 | 2.01370382978100  |
| Si 20.27743162925288 | -4.54437883243815 | 2.40293688868579  |
| Si 18.04713855067379 | -4.49705532407060 | 2.59042139522399  |
| Si 17.68086381663378 | -2.62545290479183 | 1.25923735584877  |
| Si 15.46834323243448 | -1.94057867766156 | 0.89212035009438  |
| Si 27.72802672461971 | 2.22722697544184  | 0.09581452047778  |
| Si 27.62126474212902 | -2.40370818735042 | 0.33732241679370  |
| Si 29.97793209896148 | 2.83764094277064  | 0.42425099406053  |
| Si 29.83935558125526 | -3.09069705903868 | 0.72784992148071  |
| Si 31.51986876838588 | 1.04845125063682  | 0.76942493590206  |
| Si 19.86862901944246 | -1.22481827800825 | -0.91308426128336 |
| Si 21.80424396373118 | 2.57677646225254  | -0.82805496975204 |
| Si 21.67879094736386 | -2.72303254697001 | -0.51753188383985 |
| Si 24.07243319221700 | 2.16929916567131  | -0.44935051996386 |
| Si 23.94514043855715 | -2.22882843217372 | -0.22802179999771 |
| Si 25.87186093421849 | 3.71310385691363  | -0.25335726337730 |
| Si 25.66627804892029 | -6.19258719035637 | 0.27447328153771  |
| Si 24.80262491713153 | -0.04028147424744 | -0.16962931237256 |
| Si 25.98692578865381 | 6.09764691613950  | -0.37773129587145 |
| Si 25.68339825293166 | -3.81029777981552 | 0.15220738353715  |
| Si 27.13112689192276 | -0.08108383780865 | 0.14067094964253  |
| Si 19.69663595382478 | -8.22222318204852 | -0.56242725544558 |
| Si 17.91124559121562 | -6.68253691404809 | -0.94700808926356 |

|    |                   |                   |                   |
|----|-------------------|-------------------|-------------------|
| Si | 15.70955581232874 | -7.49813414253549 | -1.18047966637837 |
| Si | 13.88405523077740 | -5.98442509950001 | -1.54206251323279 |
| Si | 14.00131126009152 | -3.60464622748138 | -1.66192330115182 |
| Si | 12.12793530792054 | -2.15950079014831 | -2.05729147124326 |
| Si | 9.88930650110201  | -2.82894837277473 | -2.34195801100774 |
| Si | 8.31023890716263  | -1.06791350951064 | -2.66764611003039 |
| Si | 8.34286304940050  | 1.32803947054245  | -2.80052756756227 |
| Si | 9.94597740973281  | 3.09339935959152  | -2.67360666754002 |
| Si | 12.18822609130932 | 2.46494457232369  | -2.31561888939880 |
| Si | 12.70578500090684 | 0.14915891360770  | -2.09168900665289 |
| Si | 15.01982475611793 | 0.14085378188327  | -1.68161210241074 |
| Si | 15.83558108433601 | 2.33984539619419  | -1.74198874739204 |
| Si | 14.09053396705073 | 3.91931527416812  | -2.09101912296945 |
| Si | 14.12138990878800 | 6.30656769589197  | -2.22775340849904 |
| Si | 15.96651373826043 | 7.84039927421522  | -2.03533144450819 |
| Si | 18.20500719062301 | 7.13541273968977  | -1.65760041547101 |
| Si | 20.12861445879215 | 8.55913061968322  | -1.43437217989926 |
| Si | 21.97152762335251 | 7.06440731612390  | -1.06200684938891 |
| Si | 21.18693152278398 | 4.83611600604713  | -1.04022611736834 |
| Si | 18.87788177358917 | 4.88235621892404  | -1.43049931647591 |
| Si | 18.12498348838724 | 2.65714631654033  | -1.41725231092912 |
| Si | 19.92088558667970 | 1.13437850738552  | -1.04163209459242 |
| Si | 24.23550570987525 | 7.70619785662269  | -0.74274466704984 |
| Si | 31.46379879509369 | -1.34786483872004 | 0.89151057404569  |
| Si | 23.76087529899748 | -7.64349801755815 | 0.07659130056355  |
| Si | 21.59987101148776 | -6.78485903335004 | -0.36873894619921 |
| Si | 21.07963414699998 | -4.77952179309522 | -1.39768017703885 |
| Si | 18.79785690825744 | -4.75602649063660 | -1.84597512701143 |
| Si | 18.02261288992668 | -2.70411178277003 | -1.13848951829730 |
| Si | 15.81138460562120 | -2.07040266637109 | -1.51382970702360 |
| C  | 19.79272626121432 | -4.79822290607180 | -3.57632662971016 |
| O  | 21.12144747050113 | -4.79675627851576 | -3.17179044992396 |
| O  | 19.46524582885539 | -4.81598742094607 | -4.73197321857133 |
| H  | 29.91402264760904 | 4.16764281041912  | 3.63704124577197  |
| H  | 29.72494133771747 | -4.08361700828514 | 4.05973926251315  |
| H  | 32.29623046739038 | 1.64014643304383  | 3.99223317890223  |
| H  | 26.29332033825425 | -6.65233350513285 | 3.61577569958801  |
| H  | 26.68058972342527 | 6.83620307774823  | 2.87654348294088  |
| H  | 19.15028168427718 | -9.19885163790851 | 2.75690803024858  |
| H  | 15.00561557481059 | -8.49918907523361 | 2.04425773892800  |
| H  | 12.29101480131584 | -6.37575015854771 | 1.46606662356852  |
| H  | 8.99495532267019  | -3.81305976992410 | 0.87230796360082  |
| H  | 6.61442695775781  | -1.32854595207729 | 0.23354135541678  |
| H  | 6.65359169409823  | 1.94886767679423  | 0.04215069006596  |

|   |                   |                   |                   |
|---|-------------------|-------------------|-------------------|
| H | 9.06304782215356  | 4.44347677493995  | 0.40519595696701  |
| H | 12.50792808307406 | 7.09779119319730  | 0.66708502438559  |
| H | 15.16687980542805 | 9.25186691811584  | 1.00137494037889  |
| H | 19.65575262255314 | 9.97147510647654  | 1.72588766419928  |
| H | 24.13315088332458 | 9.10246917176292  | 2.40844049481122  |
| H | 32.22540064077560 | -1.64140423192347 | 4.15956580500307  |
| H | 23.41787163514153 | -8.63348699177828 | 3.36143581311842  |
| H | 30.54266984283188 | 3.95826387549793  | -0.39231965977344 |
| H | 30.35239159194388 | -4.31431780996465 | 0.03438565335149  |
| H | 32.86961268020517 | 1.42726396370992  | 0.23502553314801  |
| H | 26.89211715937600 | -6.85791374796158 | -0.27582370126412 |
| H | 27.27249180660118 | 6.60739804308750  | -0.95826103062043 |
| H | 19.79237487616892 | -9.47680901212648 | -1.37018489903233 |
| H | 15.55116575301762 | -8.78512043272140 | -1.92848210195660 |
| H | 12.84672051490602 | -6.60150850703280 | -2.43202335130137 |
| H | 9.59589518451926  | -4.04885992893261 | -3.15878382425152 |
| H | 7.18113160614024  | -1.54507609478090 | -3.53275346293300 |
| H | 7.21893305959812  | 1.73184519741818  | -3.70892826682852 |
| H | 9.66206933203653  | 4.21591134503001  | -3.62300356657109 |
| H | 13.09753331504132 | 6.87269650315618  | -3.16631653840625 |
| H | 15.76441782055455 | 9.02144469340586  | -2.93534986157289 |
| H | 20.29950082147341 | 9.73144601275263  | -2.35032428870106 |
| H | 24.74003449330137 | 8.86912900995744  | -1.54169745319773 |
| H | 32.79147686163304 | -1.84383914491638 | 0.39921436294133  |
| H | 24.11138977702685 | -8.94267779446312 | -0.57920179717990 |

- **57 (CO<sub>2</sub> absorbed)**

|    |                   |                   |                  |
|----|-------------------|-------------------|------------------|
| Si | 26.91681119608440 | 2.33650389200618  | 3.27170987541248 |
| Si | 27.03225662572916 | -2.29619150319469 | 3.68155037231144 |
| Si | 29.08479432213348 | 3.16651999857625  | 3.62313434799268 |
| Si | 29.28382764565174 | -2.77310705750956 | 4.19515872004370 |
| Si | 30.70973747942317 | 1.49402335834463  | 4.11658260637202 |
| Si | 19.40530152557026 | -0.91972572269092 | 1.66086570131610 |
| Si | 21.07203746574858 | 2.62415769045198  | 2.09213739060224 |
| Si | 21.23751624873891 | -2.33547812075230 | 2.07299730556797 |
| Si | 23.28998555513477 | 2.04351759067335  | 2.50322504567016 |
| Si | 23.47081753955034 | -2.28618637290220 | 2.80462487667213 |
| Si | 25.00396503238535 | 3.66559828214692  | 2.73874704249263 |
| Si | 25.08522639285006 | -6.23279879405919 | 3.55268955371148 |
| Si | 24.25152998432477 | -0.08659296768983 | 2.76911382190555 |
| Si | 25.21907247665371 | 6.03520559228059  | 2.63964755211379 |
| Si | 25.20206922801718 | -3.84830108847037 | 3.37402257889011 |
| Si | 26.51755354341371 | 0.00348968615247  | 3.35317458632392 |

|    |                   |                   |                   |
|----|-------------------|-------------------|-------------------|
| Si | 19.00787492279472 | -8.07876054506472 | 2.58738216358873  |
| Si | 17.21494907965818 | -6.56841006544835 | 2.13154360536010  |
| Si | 14.96215312060101 | -7.24439931107800 | 1.86083062828014  |
| Si | 13.18556915909051 | -5.67359704867635 | 1.52539923308978  |
| Si | 13.29300784877159 | -3.29308183179578 | 1.39897725690611  |
| Si | 11.35366086176052 | -1.89029622646353 | 1.17997257619849  |
| Si | 9.11954719541692  | -2.60593150940783 | 0.98314022329172  |
| Si | 7.49320089416900  | -0.87211834251261 | 0.74399012797464  |
| Si | 7.45287918947757  | 1.52526745241430  | 0.62950277085887  |
| Si | 9.01393020503009  | 3.32743655084204  | 0.71213898461828  |
| Si | 11.27827708346288 | 2.73678749997127  | 0.97785842186509  |
| Si | 11.83580020455174 | 0.43005024343887  | 1.10208463874968  |
| Si | 14.17924854212976 | 0.45475535858077  | 1.19816708828071  |
| Si | 14.95146658285342 | 2.66244336967892  | 1.32161460611919  |
| Si | 13.17326399324269 | 4.21046637514630  | 1.09004686528713  |
| Si | 13.33499481553495 | 6.59423075206213  | 1.04933180920451  |
| Si | 15.25200585630443 | 8.03793011239835  | 1.24913623077118  |
| Si | 17.50407996509995 | 7.31609847672714  | 1.55365846917596  |
| Si | 19.48093788533364 | 8.67159626951078  | 1.77153442499447  |
| Si | 21.29885414009924 | 7.13088286317863  | 2.02811154090287  |
| Si | 20.53014345273269 | 4.90229518974456  | 1.94811716900596  |
| Si | 18.20711572954503 | 5.06275486141630  | 1.63723090010005  |
| Si | 17.25153039974437 | 2.91792722788246  | 1.58141600174187  |
| Si | 19.07588872785491 | 1.39859364564316  | 1.85233245459413  |
| Si | 23.56927157627790 | 7.73945008078840  | 2.30632349275828  |
| Si | 30.76055917270406 | -0.89608937247649 | 4.36015780507754  |
| Si | 23.13839081381855 | -7.60225246616215 | 3.25716921160770  |
| Si | 20.99216780220795 | -6.73684654428413 | 2.72539513497821  |
| Si | 20.35782673017684 | -4.51693530090197 | 2.22534843959421  |
| Si | 18.03815828506387 | -4.38280156235210 | 1.93413189220388  |
| Si | 17.37561359469434 | -2.16023850550267 | 1.63647796937326  |
| Si | 15.07794044543483 | -1.70443757649913 | 1.43488766825300  |
| Si | 27.35474850493292 | 2.13565348585615  | 0.88467739019210  |
| Si | 27.57341153851535 | -2.45695790764436 | 1.30839290193299  |
| Si | 29.54751193304987 | 2.91236302217952  | 1.26874855943590  |
| Si | 29.81268646653877 | -2.94971464739304 | 1.85185944189800  |
| Si | 31.20203649709433 | 1.27041900632943  | 1.79164251843641  |
| Si | 19.31182759900371 | -0.86255398609532 | -0.79670363902995 |
| Si | 21.42265033270263 | 2.52614178943655  | -0.30624186710542 |
| Si | 21.91077106266641 | -2.87544856288474 | -0.20501430973399 |
| Si | 23.68209416042664 | 1.89325907512805  | 0.08702446628031  |
| Si | 24.07211603941436 | -2.60539264661122 | 0.49081845700007  |
| Si | 25.43957477409076 | 3.50284338062715  | 0.38258385599163  |
| Si | 25.56811388298005 | -6.43542166892110 | 1.19748354619411  |

|    |                   |                   |                   |
|----|-------------------|-------------------|-------------------|
| Si | 24.56505891896389 | -0.30101885662360 | 0.39039801826379  |
| Si | 25.57859392861285 | 5.89362863726764  | 0.26284784768835  |
| Si | 25.82156489057036 | -4.06519102912925 | 1.06258231009762  |
| Si | 26.84826112107656 | -0.19512627725726 | 0.95195975792252  |
| Si | 19.37688416853599 | -8.39685957646957 | 0.22086487159697  |
| Si | 17.60193116875762 | -6.82222014069542 | -0.24650179720274 |
| Si | 15.30616727307049 | -7.39893219535602 | -0.51991398653223 |
| Si | 13.50656421264628 | -5.81619292873593 | -0.85928341920390 |
| Si | 13.48746932557084 | -3.42751904917558 | -0.99084851805353 |
| Si | 11.58139677425293 | -1.98777224502633 | -1.24554015519674 |
| Si | 9.34343025328015  | -2.70071087535266 | -1.41664847070806 |
| Si | 7.70861193845214  | -0.97829127001333 | -1.63103802486209 |
| Si | 7.68853440774737  | 1.41763068327978  | -1.74243526322575 |
| Si | 9.26264235934898  | 3.21250193089542  | -1.68150168718450 |
| Si | 11.54045085996387 | 2.64348264109345  | -1.44499641106244 |
| Si | 12.15846555261752 | 0.33426319831453  | -1.30380735960562 |
| Si | 14.50261019369831 | 0.34815075119708  | -1.18634147832444 |
| Si | 15.22060316213985 | 2.59017609796794  | -1.09967434705479 |
| Si | 13.42536510006614 | 4.14085759861704  | -1.30176834815540 |
| Si | 13.62037982823304 | 6.53195125145844  | -1.34113079278684 |
| Si | 15.54799001149782 | 7.97655860072708  | -1.14309361339958 |
| Si | 17.81164668946104 | 7.28833315130609  | -0.83982090749941 |
| Si | 19.79587720364399 | 8.63391186283436  | -0.62233869194670 |
| Si | 21.60722933859296 | 7.06760095253492  | -0.37383183027805 |
| Si | 20.82884238733070 | 4.82954722967563  | -0.43545258278873 |
| Si | 18.50653844112183 | 5.04847882971531  | -0.75979476618671 |
| Si | 17.50989271637680 | 2.95120022744280  | -0.84092694877835 |
| Si | 19.28707611404101 | 1.44361400309109  | -0.55807153361073 |
| Si | 23.90031251413536 | 7.59945642729837  | -0.07649522055103 |
| Si | 31.30990288042058 | -1.10933902883178 | 2.04782531235510  |
| Si | 23.60409301152034 | -7.82267802111358 | 0.90124914109107  |
| Si | 21.38866124627944 | -7.08788280659234 | 0.37318338160561  |
| Si | 20.75850058895105 | -4.87117959762569 | -0.12122756159016 |
| Si | 18.43290180998835 | -4.60418841208457 | -0.41904714345761 |
| Si | 17.55538924738053 | -2.41361740890259 | -0.77302014234441 |
| Si | 15.28308291462425 | -1.87610535122359 | -0.98172295938583 |
| H  | 29.25478556484786 | 4.44355989910466  | 4.38571700756229  |
| H  | 29.59060295004803 | -3.84003809071514 | 5.19967418675920  |
| H  | 31.77564057826881 | 2.03905556239464  | 5.02084766859618  |
| H  | 26.01886349490881 | -6.84310867601317 | 4.55471717966916  |
| H  | 26.32732349799391 | 6.52520871989789  | 3.52384283425504  |
| H  | 18.80905507359488 | -9.19196183516638 | 3.56965944025999  |
| H  | 14.52700821180131 | -8.42226376121970 | 2.67818154687642  |
| H  | 11.91051903557347 | -6.17856497481265 | 2.13232961037279  |

|   |                   |                   |                   |
|---|-------------------|-------------------|-------------------|
| H | 8.64826354896702  | -3.75010284030518 | 1.82601079661006  |
| H | 6.19595930010955  | -1.30705845253505 | 1.35985291746931  |
| H | 6.13297347907458  | 1.96726162196701  | 1.18956945093186  |
| H | 8.50675569995820  | 4.53063005733516  | 1.44432336680835  |
| H | 12.12941988458070 | 7.28246493408628  | 1.61734612253827  |
| H | 14.85842602114961 | 9.31063572797195  | 1.93656196108931  |
| H | 19.45530392449575 | 9.91109920663386  | 2.61268892183969  |
| H | 23.86438800242776 | 8.98037951331950  | 3.09195007955750  |
| H | 31.82928190477949 | -1.20616234291806 | 5.36713669090871  |
| H | 23.16046484118838 | -8.79667554325508 | 4.16171763391401  |
| H | 30.07269838641304 | 4.01052472765355  | 0.39668956792883  |
| H | 30.41509678244299 | -4.16349550599705 | 1.21602310187475  |
| H | 32.54074060517495 | 1.73918566908346  | 1.30223859079112  |
| H | 26.76572800385794 | -7.22636876288165 | 0.76158007545011  |
| H | 26.87131243402363 | 6.39303062816431  | -0.31316968582678 |
| H | 19.39857201944568 | -9.71907503696300 | -0.48443283598821 |
| H | 14.99743077417922 | -8.65440399647793 | -1.27940867465712 |
| H | 12.45920215091512 | -6.48459728052774 | -1.70076346844021 |
| H | 9.05078857279002  | -3.91583569777220 | -2.24076811538378 |
| H | 6.53881750239622  | -1.47202518943288 | -2.43012055857578 |
| H | 6.51312257329225  | 1.81300384956136  | -2.58713042357694 |
| H | 8.91150112608439  | 4.33154779950087  | -2.61205586070904 |
| H | 12.60435452474283 | 7.21391264215537  | -2.20928043442591 |
| H | 15.32656114207601 | 9.20733423457462  | -1.97015884047724 |
| H | 19.96015171421690 | 9.84624424918830  | -1.48674358448837 |
| H | 24.47165177595559 | 8.73436202065613  | -0.87130303006223 |
| H | 32.70210512441719 | -1.53750250691924 | 1.68858058421099  |
| H | 24.04597865171336 | -9.13470552062040 | 0.32500418753459  |
| C | 21.67430395527107 | -1.87474781843730 | -1.84819330356921 |
| O | 20.53201441907748 | -1.15273640915208 | -1.99161488177534 |
| O | 22.50289682630759 | -1.91941195980389 | -2.73149488919349 |

- **77 (CO<sub>2</sub> absorbed)**

|    |                   |                   |                  |
|----|-------------------|-------------------|------------------|
| Si | 26.84737138820347 | 2.41903898464903  | 3.18388435876663 |
| Si | 26.76372196715653 | -2.17047114348667 | 3.41522334769544 |
| Si | 29.08958674594044 | 3.05334054952429  | 3.50676802783417 |
| Si | 28.98316154324522 | -2.84864522559793 | 3.80039889585395 |
| Si | 30.65449308523202 | 1.28511641561571  | 3.85733570892285 |
| Si | 19.25092063873273 | -0.98930943487785 | 1.71180422186297 |
| Si | 21.05679667709687 | 2.93695298008534  | 1.97807287078749 |
| Si | 20.94633512697731 | -2.56393142554895 | 2.30252593532025 |
| Si | 23.26019569101158 | 2.36476687854135  | 2.45768872626568 |
| Si | 23.17820238233835 | -2.05027329823960 | 2.69324648158105 |

|    |                   |                   |                   |
|----|-------------------|-------------------|-------------------|
| Si | 25.01540976416739 | 3.90983665933762  | 2.78718351418453  |
| Si | 24.90985551481176 | -5.98491526159520 | 3.45185446652678  |
| Si | 23.98373587699155 | 0.14626518228990  | 2.63468428042988  |
| Si | 25.17264121707367 | 6.28541852817202  | 2.83380853652925  |
| Si | 24.87458933934982 | -3.62076050015391 | 3.17083838668969  |
| Si | 26.27208824549395 | 0.12713735914733  | 3.16311608807071  |
| Si | 18.93205268944617 | -8.44030909421551 | 2.96844582048771  |
| Si | 17.10057511998483 | -6.96196468608737 | 2.45256925852654  |
| Si | 14.80157250020467 | -7.50121033487981 | 2.14815731761832  |
| Si | 13.16050416749667 | -5.81536082985073 | 1.66920028492965  |
| Si | 13.35639005604001 | -3.45533171120130 | 1.42390394014152  |
| Si | 11.52421873008482 | -1.94848069511920 | 1.10166172724312  |
| Si | 9.27154631161149  | -2.56193270796136 | 0.81459663665667  |
| Si | 7.71858620074587  | -0.77662045264525 | 0.50875108353639  |
| Si | 7.78780344842234  | 1.61975154780780  | 0.39399667344880  |
| Si | 9.43596963299500  | 3.34189017892383  | 0.52507247337089  |
| Si | 11.65469855767361 | 2.64086670507765  | 0.87169035073977  |
| Si | 12.13532511585368 | 0.33243191460045  | 1.01363189667980  |
| Si | 14.47678199757538 | 0.27882291534412  | 1.18884127462476  |
| Si | 15.29636336576023 | 2.46882599127195  | 1.24029759295495  |
| Si | 13.56994599852115 | 4.06879929605948  | 1.03992177472750  |
| Si | 13.44595176806819 | 6.44586222238058  | 1.04593552355846  |
| Si | 15.14320675250549 | 8.11301290807694  | 1.35629082488814  |
| Si | 17.41433640235641 | 7.49934632483497  | 1.71273840329094  |
| Si | 19.31123000684306 | 8.93427295476108  | 2.09885951459968  |
| Si | 21.20568515395767 | 7.45808548349442  | 2.29442931739762  |
| Si | 20.46431539808198 | 5.22707787856389  | 2.00441611706512  |
| Si | 18.15489642374986 | 5.24933370374327  | 1.64282827727043  |
| Si | 17.56164517928023 | 2.97056560867132  | 1.42873088723249  |
| Si | 19.32407092173520 | 1.36072014358410  | 1.51385395927898  |
| Si | 23.49966359496128 | 7.99567143529178  | 2.63292377141462  |
| Si | 30.60990869361963 | -1.11157026803651 | 3.97505033445118  |
| Si | 23.15532688846356 | -7.62386713346321 | 3.41615624403230  |
| Si | 20.88338613855112 | -7.02756749237843 | 3.02696575707914  |
| Si | 20.24290092272444 | -4.80313510415614 | 2.53676245376807  |
| Si | 17.93190538092835 | -4.76333178117819 | 2.17289174277637  |
| Si | 17.40110961904061 | -2.50126318784634 | 1.76327170233149  |
| Si | 15.16550157041821 | -1.93941700061652 | 1.46938957909278  |
| Si | 27.22851335439636 | 2.30652540124917  | 0.77877137751877  |
| Si | 27.13500838112851 | -2.31667256334198 | 1.00997214685393  |
| Si | 29.48071556559360 | 2.91019139473483  | 1.13067687830115  |
| Si | 29.36823485416356 | -2.95535630865977 | 1.42182638659156  |
| Si | 31.05479675915615 | 1.15950440685751  | 1.50609423432977  |
| Si | 19.59166039428575 | -1.59337402047728 | -0.61570029876285 |



|    |                   |                   |                   |
|----|-------------------|-------------------|-------------------|
| Si | 21.52837045290577 | 3.14796355273968  | -0.39582543386444 |
| Si | 21.37059795049568 | -2.99870610582681 | -0.04843702843561 |
| Si | 23.67287388722139 | 2.33532026943281  | 0.06445190960463  |
| Si | 23.56879479167556 | -2.27654371336249 | 0.30306627780464  |
| Si | 25.44442902964198 | 3.88830686723813  | 0.42156510637151  |
| Si | 25.25583029806607 | -6.25206182306944 | 1.08378049706439  |
| Si | 24.22830262955814 | 0.01798637925063  | 0.24196830193084  |
| Si | 25.52769784158073 | 6.30184522823002  | 0.45156581930509  |
| Si | 25.28431297948171 | -3.85201867719566 | 0.81233513062880  |
| Si | 26.53636431488822 | -0.00054162526913 | 0.75017632273184  |
| Si | 19.28409858089091 | -8.82957640745984 | 0.61446911990876  |
| Si | 17.46923941887121 | -7.34283935411913 | 0.08947249306889  |
| Si | 15.16176472350155 | -7.80089566421317 | -0.21390741878974 |
| Si | 13.52452349276562 | -6.08357902258397 | -0.69606538299473 |
| Si | 13.65661929102681 | -3.68642200982427 | -0.95112672512196 |
| Si | 11.87478374688945 | -2.09747280115580 | -1.30682928471592 |
| Si | 9.60173466438881  | -2.66885243304992 | -1.57237977922953 |
| Si | 8.02959369652476  | -0.89730027277008 | -1.85584127488511 |
| Si | 8.09056363352032  | 1.49518287667515  | -1.97157913526959 |
| Si | 9.75585397838339  | 3.19774315577521  | -1.86188198424633 |
| Si | 11.99299268928350 | 2.52595689258833  | -1.53865715883776 |
| Si | 12.59255089162317 | 0.19924020448917  | -1.36873450190843 |
| Si | 14.94721791686922 | 0.14428952734040  | -1.16971832787739 |
| Si | 15.60585687553961 | 2.44107748308980  | -1.16809143050837 |
| Si | 13.85284368057828 | 4.04791570557251  | -1.34773665545991 |
| Si | 13.81357492450435 | 6.46166730433075  | -1.33447485990201 |
| Si | 15.51125921192272 | 8.16085621190565  | -1.02322712936007 |
| Si | 17.79853313226101 | 7.64047232416780  | -0.67413508643815 |
| Si | 19.67674309397090 | 9.08966944102939  | -0.27854656846152 |
| Si | 21.55443539956788 | 7.59911963011226  | -0.09625832932959 |
| Si | 20.83491220474909 | 5.38024972800100  | -0.36614761612075 |
| Si | 18.51083268080009 | 5.40193697346939  | -0.72938967738770 |
| Si | 17.81783158958469 | 3.18091642041442  | -0.97795089409342 |
| Si | 19.69119285628662 | 1.79309665660952  | -0.87965426604812 |
| Si | 23.85829553838566 | 8.04600855291692  | 0.25195143682728  |
| Si | 31.00534797725963 | -1.23278557906897 | 1.62343722389474  |
| Si | 23.50430752089103 | -7.92398485279023 | 1.05231833778685  |
| Si | 21.22261430430213 | -7.40754763084146 | 0.65944530760084  |
| Si | 20.59750556571026 | -5.19412406726370 | 0.18397885617605  |
| Si | 18.27964969369156 | -5.15525869581383 | -0.18123202962737 |
| Si | 17.68060271303628 | -2.93595290277715 | -0.60916187347443 |
| Si | 15.49385599191427 | -2.16645130443050 | -0.92742332233623 |
| H  | 29.37322660907362 | 4.27197471547515  | 4.32904951623641  |
| H  | 29.22335003900202 | -3.98955560061757 | 4.73967102320152  |

|   |                   |                    |                   |
|---|-------------------|--------------------|-------------------|
| H | 31.76524090400214 | 1.75558096140736   | 4.74951209572113  |
| H | 25.99964186289986 | -6.42061685642680  | 4.38597713016837  |
| H | 26.28569542331330 | 6.75306915672838   | 3.72394188789971  |
| H | 18.75785568541474 | -9.52228686000976  | 3.98985600598315  |
| H | 14.22532105577331 | -8.58714426673266  | 3.00467227934587  |
| H | 11.83073867293381 | -6.21052662752214  | 2.23958058049029  |
| H | 8.73357583703535  | -3.69178638395007  | 1.63643621267351  |
| H | 6.38176235385108  | -1.15540969562791  | 1.07476551905438  |
| H | 6.47809254513124  | 2.12786314430599   | 0.92109003940205  |
| H | 8.95729692872015  | 4.57245858943660   | 1.23094198057163  |
| H | 12.12912299516908 | 6.93477322353574   | 1.57194543413660  |
| H | 14.61284401489971 | 9.29921277578514   | 2.10201574804189  |
| H | 19.18109570056709 | 10.11032897841258  | 3.01686371278087  |
| H | 23.81992807976485 | 9.17007556868750   | 3.50647439305215  |
| H | 31.70884300038217 | -1.53050628834244  | 4.90669299296599  |
| H | 23.42587453956614 | -8.72141221860669  | 4.39971276026511  |
| H | 30.03621563153255 | 4.03311172617730   | 0.31069300963064  |
| H | 29.88576389461328 | -4.17170918356008  | 0.71851946175735  |
| H | 32.40432164072684 | 1.56092931867403   | 0.98798242874062  |
| H | 26.52193681884257 | -6.91327030375451  | 0.62276260947270  |
| H | 26.82279227159301 | 6.85400912589530   | -0.06879776872458 |
| H | 19.35662077026273 | -10.18069367421935 | -0.02676904581565 |
| H | 14.78919977476632 | -9.07431940652835  | -0.91079266010857 |
| H | 12.43622171078355 | -6.70977191313831  | -1.51828921691588 |
| H | 9.27789914802184  | -3.87207120897086  | -2.40276665807432 |
| H | 6.88309182914511  | -1.36420678176354  | -2.70345694551969 |
| H | 6.96384712857299  | 1.93444062907722   | -2.85954055345224 |
| H | 9.49841923424952  | 4.33166602910492   | -2.80531341008998 |
| H | 12.74760271542090 | 7.04238793465230   | -2.21715954795628 |
| H | 15.18507048348521 | 9.36857524491999   | -1.84852263554538 |
| H | 19.80714078071983 | 10.37348408736390  | -1.03813881926244 |
| H | 24.44981264285889 | 9.24301634274697   | -0.42883546063582 |
| H | 32.33674833300154 | -1.73708570385015  | 1.15001767758671  |
| H | 24.03387629399027 | -9.20970633439365  | 0.49322954856904  |
| C | 19.86831420010116 | -0.61403034442520  | -2.25921459694891 |
| O | 20.01344489539563 | -1.22505538871215  | -3.29580306969801 |
| O | 19.90243121915376 | 0.74185181519565   | -2.22928818234895 |

- **55 (H<sub>2</sub> absorbed)**

|    |                   |                   |                  |
|----|-------------------|-------------------|------------------|
| Si | 26.93120699307554 | 2.47773298491933  | 3.23210786745658 |
| Si | 26.85300035450829 | -2.13681017426124 | 3.47942092484709 |
| Si | 29.17426487263170 | 3.12537371796821  | 3.53966832294593 |
| Si | 29.08515946420564 | -2.78622780589573 | 3.85633552674371 |

|    |                   |                   |                  |
|----|-------------------|-------------------|------------------|
| Si | 30.74553470136918 | 1.35827486686688  | 3.87454684913190 |
| Si | 19.15394301650216 | -0.85265379897704 | 2.20974615775802 |
| Si | 21.01200172427455 | 3.03471574476888  | 2.22394328235192 |
| Si | 20.94754491786903 | -2.37833451011273 | 2.57026761087091 |
| Si | 23.23780460407800 | 2.42580232983311  | 2.63367835890479 |
| Si | 23.22415477704265 | -2.00514474080289 | 2.88918692396409 |
| Si | 25.06832006675014 | 3.93457682221606  | 2.82205377376008 |
| Si | 24.97512051720979 | -5.98298618992741 | 3.38661732181342 |
| Si | 24.00575570989416 | 0.20690438096661  | 2.85839943622943 |
| Si | 25.18067790204324 | 6.31174108337946  | 2.71977313622397 |
| Si | 24.95667844118361 | -3.59476776425042 | 3.24442204758636 |
| Si | 26.32200301516067 | 0.17683921919546  | 3.25869642544782 |
| Si | 19.01422083594384 | -8.31337261684981 | 2.61714625493453 |
| Si | 17.15808779222437 | -6.82985185759582 | 2.25953596137677 |
| Si | 14.88539196431932 | -7.45150293946372 | 1.94842795494812 |
| Si | 13.13290294811697 | -5.83985387696129 | 1.59439157737173 |
| Si | 13.23817534575914 | -3.45211638044955 | 1.47292990039795 |
| Si | 11.41601032518018 | -1.92169508907754 | 1.12493444916681 |
| Si | 9.14916404200659  | -2.48110218663964 | 0.80876056462713 |
| Si | 7.62585907794050  | -0.67532902322325 | 0.46570084804302 |
| Si | 7.70855634829185  | 1.71923613144634  | 0.34103419095614 |
| Si | 9.36869420494423  | 3.42651739373912  | 0.50669642387554 |
| Si | 11.57131728118189 | 2.68804867050442  | 0.88782933801980 |
| Si | 12.06957373564972 | 0.37127587641620  | 1.08026573342954 |
| Si | 14.39752072146698 | 0.32237422486355  | 1.42306082323279 |
| Si | 15.26109644424498 | 2.51830226975005  | 1.47866812127318 |
| Si | 13.51238078798463 | 4.07636873294152  | 1.08403557964154 |
| Si | 13.49200575701767 | 6.45482230087688  | 0.95412047824913 |
| Si | 15.42329990818847 | 7.85262068513668  | 1.17423228058728 |
| Si | 17.55499899837367 | 6.91583414021804  | 1.55517359980959 |
| Si | 19.34415919598121 | 8.47598149963476  | 1.69821585255878 |
| Si | 21.11970666141822 | 6.93293341323142  | 2.06819095446758 |
| Si | 20.33135072939035 | 5.04890688467601  | 3.21083155521010 |
| Si | 17.97804858804709 | 5.08609338073079  | 2.94244996370925 |
| Si | 17.49597461533071 | 3.13109501992447  | 1.75735031614395 |
| Si | 19.20194041036358 | 1.50971541864747  | 2.03656528314151 |
| Si | 23.31763445562825 | 7.77428896994159  | 2.33177817287838 |
| Si | 30.70352928142814 | -1.03738710385262 | 4.00130222907814 |
| Si | 23.16818968649257 | -7.55968741427328 | 3.19831893703385 |
| Si | 20.92587742563716 | -6.87391981198450 | 2.82643178343625 |
| Si | 20.24997475879600 | -4.62272082069738 | 2.58821984003429 |
| Si | 17.93581757143354 | -4.60076596069406 | 2.23447939334554 |
| Si | 17.30761859712693 | -2.34800162922929 | 2.02608855145034 |
| Si | 15.04644050348128 | -1.92116843411113 | 1.66719277241701 |

|    |                   |                   |                   |
|----|-------------------|-------------------|-------------------|
| H  | 29.47248055204442 | 4.34227972456645  | 4.35964110622034  |
| H  | 29.34940895485824 | -3.91332592887728 | 4.80606506102035  |
| H  | 31.86749273824524 | 1.83194021286062  | 4.75086738950961  |
| H  | 26.01775507853672 | -6.51839729895365 | 4.32274429609612  |
| H  | 26.18615928357068 | 6.94495118838705  | 3.63443058205413  |
| H  | 18.86639441567205 | -9.48778508161088 | 3.53443864056348  |
| H  | 14.38140844260474 | -8.61847501694167 | 2.74217461130698  |
| H  | 11.85200020165768 | -6.36009289057923 | 2.17654187917771  |
| H  | 8.56925140348964  | -3.59080763963683 | 1.63015231076944  |
| H  | 6.27423888033245  | -1.04380888362925 | 1.00322998039219  |
| H  | 6.38913009617226  | 2.23571818518276  | 0.83495408574736  |
| H  | 8.88503031262370  | 4.65829131566379  | 1.20743076255197  |
| H  | 12.26567258964183 | 7.11373567573710  | 1.51237664012863  |
| H  | 15.13366504878888 | 9.13621480311890  | 1.88920994490880  |
| H  | 19.23024897417769 | 9.71139334420080  | 2.53415929883443  |
| H  | 23.44875984049212 | 9.05951168500258  | 3.08931789125238  |
| H  | 31.81713422166340 | -1.44877849865510 | 4.91887161546740  |
| H  | 23.38985163975864 | -8.73317006535293 | 4.10346959752082  |
| Si | 27.31513549490937 | 2.33574520108565  | 0.83076413597746  |
| Si | 27.22970565865397 | -2.27419111806098 | 1.07799880292962  |
| Si | 29.55354507884596 | 2.98925442769205  | 1.15731453378066  |
| Si | 29.45998720585720 | -2.91940599978293 | 1.47650133789031  |
| Si | 31.12111895630580 | 1.22603481305298  | 1.51932247717015  |
| Si | 19.50698217293852 | -0.99728876926783 | -0.18629831690343 |
| Si | 21.39549367554526 | 2.82587983666711  | -0.17883457289340 |
| Si | 21.31205015166468 | -2.51728481887743 | 0.16597180190531  |
| Si | 23.63540269836999 | 2.29278938070782  | 0.24755150198278  |
| Si | 23.59270586534670 | -2.14780404538563 | 0.48834932506987  |
| Si | 25.45795135478483 | 3.80469140298004  | 0.45642744915337  |
| Si | 25.34241942715259 | -6.12031567272675 | 1.00951263971376  |
| Si | 24.37402439144304 | 0.06442055190687  | 0.48415280323669  |
| Si | 25.57399279579890 | 6.17737915193307  | 0.34398579152211  |
| Si | 25.32739654476437 | -3.73130864642696 | 0.87101646782781  |
| Si | 26.69307094596307 | 0.03772606537103  | 0.87059281011648  |
| Si | 19.37325811938294 | -8.45175031404287 | 0.23833917851957  |
| Si | 17.51611117203302 | -6.97124381048872 | -0.13293810783183 |
| Si | 15.24057274118253 | -7.58926728534754 | -0.42943247374192 |
| Si | 13.49002664535917 | -5.97494348213501 | -0.78403610682310 |
| Si | 13.59264186297978 | -3.58663454337987 | -0.90348159673342 |
| Si | 11.77224765893141 | -2.05920029484226 | -1.27992777112724 |
| Si | 9.50276560758820  | -2.61839315438745 | -1.57357382843046 |
| Si | 7.97714371680551  | -0.80990104398175 | -1.89176810577272 |
| Si | 8.06287114421945  | 1.58488116000856  | -2.01681789315789 |
| Si | 9.72707304951896  | 3.29151616895891  | -1.87885944745362 |

|    |                   |                   |                   |
|----|-------------------|-------------------|-------------------|
| Si | 11.93465821863084 | 2.55502382527991  | -1.51922049905452 |
| Si | 12.42286793037228 | 0.23396076317507  | -1.30917303178337 |
| Si | 14.74636453955775 | 0.18411437047579  | -0.95600141475727 |
| Si | 15.62409172484206 | 2.37152080798432  | -0.92042655677859 |
| Si | 13.87787563803439 | 3.94291843487357  | -1.28687727428137 |
| Si | 13.86994704963630 | 6.32446440691067  | -1.42309296203864 |
| Si | 15.79837486886681 | 7.73204583947037  | -1.19438585173882 |
| Si | 17.92499426563733 | 6.75792306548179  | -0.82658704385469 |
| Si | 19.69753840464733 | 8.33961566198492  | -0.65243902924638 |
| Si | 21.49498633144711 | 6.81976367734939  | -0.32431524765280 |
| Si | 20.66861166679960 | 4.80509062272729  | -1.06379085049038 |
| Si | 18.59596857001817 | 4.81544318622101  | -1.93992374614784 |
| Si | 17.86180965351759 | 3.01973657019890  | -0.64303000381497 |
| Si | 19.54047552021247 | 1.36173855969178  | -0.33745834495411 |
| Si | 23.70030630224965 | 7.62014112525980  | -0.03073492734508 |
| Si | 31.07498262384095 | -1.16916007083970 | 1.64698753167797  |
| Si | 23.53027592644859 | -7.69304354437710 | 0.82122041228049  |
| Si | 21.28760337423418 | -7.01249743732522 | 0.43432985324258  |
| Si | 20.60667634578120 | -4.76135441161633 | 0.20696932964559  |
| Si | 18.29214172043741 | -4.74192820784508 | -0.14859597134685 |
| Si | 17.66362725809274 | -2.49136137830186 | -0.37742542478480 |
| Si | 15.40279555986890 | -2.05732568423462 | -0.72971148126105 |
| H  | 30.10506391145635 | 4.11454240532532  | 0.33782302037110  |
| H  | 29.98604233996634 | -4.13811790928857 | 0.78363256602403  |
| H  | 32.46822040933012 | 1.61865651051718  | 0.98817672929649  |
| H  | 26.60530628242483 | -6.74708378852009 | 0.49725417861111  |
| H  | 26.81998581375669 | 6.73824135349171  | -0.27353891789043 |
| H  | 19.47609542048815 | -9.72562998458855 | -0.54230978331439 |
| H  | 14.96729810992735 | -8.84567826687132 | -1.19926204468584 |
| H  | 12.42634942916382 | -6.57776092208346 | -1.65315654000485 |
| H  | 9.16599143553791  | -3.82290561553774 | -2.39711080500584 |
| H  | 6.83371831390186  | -1.25611016313546 | -2.75495926986722 |
| H  | 6.95436791415214  | 2.02088439723820  | -2.92930340128278 |
| H  | 9.48320741499614  | 4.42894905324306  | -2.82175604742760 |
| H  | 12.87429472782089 | 6.89060555402728  | -2.39137423853368 |
| H  | 15.71901920105714 | 8.92969086404911  | -2.09099584062377 |
| H  | 19.83233194483341 | 9.46651413009637  | -1.62394427588370 |
| H  | 24.04361960339804 | 8.80586913114378  | -0.87840418491879 |
| H  | 32.40853534552125 | -1.66155596075909 | 1.16675318280624  |
| H  | 23.99065931868631 | -8.95519677826636 | 0.15739167522904  |
| H  | 17.24331111025533 | 5.15143256238963  | 4.24523488911386  |
| H  | 20.75800005228152 | 5.06047480980785  | 4.64704128214097  |

- 57 (H<sub>2</sub> absorbed)

|                      |                   |                  |
|----------------------|-------------------|------------------|
| Si 26.99370660175667 | 2.42598886008292  | 3.27399079352754 |
| Si 26.80823267070253 | -2.24246042705125 | 3.48048795582200 |
| Si 29.25895595694686 | 2.98319319208761  | 3.58324411568200 |
| Si 29.00461141889935 | -3.00080403530151 | 3.84433855322587 |
| Si 30.73721930402835 | 1.13145615420640  | 3.89703904698184 |
| Si 19.00619117378625 | -0.79207896155172 | 3.30551798907160 |
| Si 21.02214446700639 | 2.60578878662477  | 2.27589809398959 |
| Si 20.80501530849775 | -2.12309526472071 | 2.55012219372489 |
| Si 23.32168447058112 | 2.34098267517576  | 2.64559504131494 |
| Si 23.11806229447394 | -1.93286029361262 | 2.87061397312124 |
| Si 25.13182520942305 | 3.88476900220010  | 2.86767270876488 |
| Si 24.94210028496682 | -5.93995896332383 | 3.34556311884728 |
| Si 24.15739161644537 | 0.16638922567981  | 2.81389696111259 |
| Si 25.28246150549356 | 6.26394131345926  | 2.77118452286594 |
| Si 24.83168833000316 | -3.56840987640644 | 3.20290572186759 |
| Si 26.44855096464175 | 0.10407974247665  | 3.28543072842750 |
| Si 18.97862246160708 | -7.99263870776615 | 2.56684857776381 |
| Si 17.17989998470297 | -6.45757845840045 | 2.23557873105116 |
| Si 14.96627129576444 | -7.21379755496509 | 1.92154617938416 |
| Si 13.25012178021801 | -5.58336003433592 | 1.57187818015189 |
| Si 13.51003391986874 | -3.22181636688752 | 1.47627487573797 |
| Si 11.51749108931511 | -1.95400395313374 | 1.09973066187919 |
| Si 9.33399829000125  | -2.78012218671936 | 0.81736864186699 |
| Si 7.70136578952906  | -1.06928517247676 | 0.47983045551038 |
| Si 7.65386225725236  | 1.32897811436019  | 0.35511333278012 |
| Si 9.15687376244144  | 3.18137446390021  | 0.49513352161205 |
| Si 11.42966521383292 | 2.66954421046619  | 0.85453574450646 |
| Si 11.99544439821610 | 0.36244501778220  | 1.04184747211047 |
| Si 14.29779070251194 | 0.35634797846290  | 1.48006284231412 |
| Si 15.09681896066591 | 2.55043202907958  | 1.40205724644800 |
| Si 13.33595625349353 | 4.11655675380826  | 1.06836868928217 |
| Si 13.39438285094620 | 6.50366385929124  | 0.95695210482442 |
| Si 15.26813512394817 | 7.99604516215879  | 1.16895988302612 |
| Si 17.49294164198517 | 7.24393812107612  | 1.54193280408288 |
| Si 19.43670684289100 | 8.63813342577703  | 1.76815607012163 |
| Si 21.27187140072853 | 7.13275737598416  | 2.11789124428091 |
| Si 20.49643357798800 | 4.89665565416196  | 2.08650424340946 |
| Si 18.18763218966567 | 4.99799663757296  | 1.74317977383710 |
| Si 17.38777886563421 | 2.79795714421598  | 1.74528074765962 |
| Si 19.11363181814280 | 1.18498795448391  | 2.04610202940074 |
| Si 23.51230908933471 | 7.84940788113425  | 2.41657002192734 |
| Si 30.64157026697091 | -1.26706020752713 | 4.00138160896907 |

|    |                   |                   |                   |
|----|-------------------|-------------------|-------------------|
| Si | 23.09845457665507 | -7.45528516635406 | 3.14155617287250  |
| Si | 20.91227805104326 | -6.61160838627523 | 2.78349373917620  |
| Si | 20.18853295508881 | -4.38208398697296 | 2.49485996448213  |
| Si | 17.86017500131119 | -4.21059665933551 | 2.22823348293772  |
| Si | 17.09081619179764 | -2.21190321993524 | 3.17948302425620  |
| Si | 15.35649760879705 | -1.73102942580007 | 1.69363743380487  |
| H  | 29.61195080344215 | 4.17136046812336  | 4.42324366350937  |
| H  | 29.24808943205826 | -4.14039923025422 | 4.78443105780371  |
| H  | 31.88354682604941 | 1.55091665249670  | 4.77001127523381  |
| H  | 25.96988626300303 | -6.45686504687938 | 4.30708883116335  |
| H  | 26.33385046494224 | 6.84440005460559  | 3.66924029664045  |
| H  | 18.78777638532137 | -9.16045093804089 | 3.48533867362087  |
| H  | 14.49802809802102 | -8.36487147254681 | 2.75927693808565  |
| H  | 11.95280409489921 | -6.00265753167875 | 2.19786053089433  |
| H  | 8.85302396434865  | -3.92254767792964 | 1.65732834061829  |
| H  | 6.37272089642208  | -1.50518795997955 | 1.02414414158500  |
| H  | 6.29904704296960  | 1.75450664283312  | 0.84093544623023  |
| H  | 8.56677249677375  | 4.36653530344757  | 1.19471738001785  |
| H  | 12.15950267078586 | 7.16741195921035  | 1.49011482258811  |
| H  | 14.85666978803315 | 9.26888404183894  | 1.84496061105895  |
| H  | 19.36041140184752 | 9.90062000003418  | 2.57059298508752  |
| H  | 23.73921885989533 | 9.10522879712109  | 3.20183456520635  |
| H  | 31.75298207553188 | -1.70062140526847 | 4.91167595069572  |
| H  | 23.25556577511629 | -8.64556657186265 | 4.03836338125574  |
| Si | 27.36822090012555 | 2.29520594656616  | 0.87166986201767  |
| Si | 27.17529713313985 | -2.35904484445974 | 1.07748886703089  |
| Si | 29.63118057686593 | 2.85468427800748  | 1.20234162106600  |
| Si | 29.37239726488329 | -3.10997122843555 | 1.46049448615730  |
| Si | 31.11347450531166 | 1.01368694819800  | 1.54424415629095  |
| Si | 19.41095243859330 | -1.13680364199816 | -0.87523086606535 |
| Si | 21.40140664061545 | 2.51033429648916  | -0.11097899444567 |
| Si | 21.17313991551606 | -2.26881856955559 | 0.11966125660283  |
| Si | 23.69522326052934 | 2.23771605610567  | 0.26023678155716  |
| Si | 23.48032710866075 | -2.05441526425153 | 0.48015531705232  |
| Si | 25.51449415393438 | 3.76871387612521  | 0.49221825237338  |
| Si | 25.30534650535237 | -6.06200499444593 | 0.96259829606423  |
| Si | 24.48331875391984 | 0.05192007561045  | 0.40152688511350  |
| Si | 25.65280864073225 | 6.14831037867964  | 0.39470719291757  |
| Si | 25.19784001147054 | -3.69013365820191 | 0.83351757641603  |
| Si | 26.76470847399862 | -0.01710994886623 | 0.89083108723637  |
| Si | 19.32873601525226 | -8.11497338634248 | 0.18171959995384  |
| Si | 17.54533686274953 | -6.56164750303139 | -0.14856434701878 |
| Si | 15.33279923896765 | -7.33110572922379 | -0.45549400254797 |
| Si | 13.60493423413092 | -5.71057251142828 | -0.80399274323702 |

|    |                   |                   |                   |
|----|-------------------|-------------------|-------------------|
| Si | 13.85531463525309 | -3.34706397163743 | -0.89147162315881 |
| Si | 11.86868559372729 | -2.08341985016291 | -1.30960858425517 |
| Si | 9.68020261365427  | -2.90004432015327 | -1.57219076302163 |
| Si | 8.04575509183701  | -1.18487729774070 | -1.87911994938713 |
| Si | 7.99674390107995  | 1.21357346175923  | -2.00302981388918 |
| Si | 9.50042004005191  | 3.06820403004287  | -1.89014225068726 |
| Si | 11.77532871728486 | 2.55296385547838  | -1.54972721220926 |
| Si | 12.31510943086953 | 0.24132804161727  | -1.35073037916008 |
| Si | 14.61880402630022 | 0.23505707243640  | -0.90974810732275 |
| Si | 15.43919611742734 | 2.42563035450613  | -0.98150093466477 |
| Si | 13.68516907154363 | 3.99701373201673  | -1.31669182951090 |
| Si | 13.75441484370439 | 6.38532059383841  | -1.42278291784607 |
| Si | 15.62595992180689 | 7.88293384019002  | -1.21194640539301 |
| Si | 17.85333653966556 | 7.13647875884244  | -0.84567581031783 |
| Si | 19.79708925611371 | 8.53256509363950  | -0.61589296395960 |
| Si | 21.63229592248080 | 7.02400757575114  | -0.27787118275863 |
| Si | 20.84710741799521 | 4.79183350408663  | -0.28998498067336 |
| Si | 18.53817320744790 | 4.88888431287852  | -0.64451637312989 |
| Si | 17.73005156676025 | 2.69318988459365  | -0.65634252969263 |
| Si | 19.47835759816093 | 1.10939318217564  | -0.37055287138996 |
| Si | 23.87565321060988 | 7.72893620974688  | 0.03983346116327  |
| Si | 31.01339971340047 | -1.38343568813350 | 1.64714475369354  |
| Si | 23.45467150025592 | -7.56946625708740 | 0.75764171958675  |
| Si | 21.26536951453052 | -6.73851162011852 | 0.39521803119131  |
| Si | 20.53766279513743 | -4.51289292312758 | 0.14817891792246  |
| Si | 18.22049370819319 | -4.30150693103231 | -0.17368681364914 |
| Si | 17.76959922762727 | -2.49799223781590 | -1.58953704047512 |
| Si | 15.70885263919924 | -1.85213920922092 | -0.71771537501662 |
| H  | 30.22686624328729 | 3.95906294112786  | 0.38554555141282  |
| H  | 29.86393841264300 | -4.32845314053010 | 0.74262769593187  |
| H  | 32.47986825894341 | 1.36643741838287  | 1.03408655941509  |
| H  | 26.55871706321919 | -6.66714221071101 | 0.40507922523543  |
| H  | 26.93099431314226 | 6.66502957406295  | -0.19545262274516 |
| H  | 19.38266424205309 | -9.37450884018886 | -0.62786746703958 |
| H  | 15.13008057375122 | -8.57175154710052 | -1.27127947960656 |
| H  | 12.54212695919586 | -6.23306781053618 | -1.72490587477612 |
| H  | 9.43275860125539  | -4.12494583932431 | -2.39693844695247 |
| H  | 6.92157504482687  | -1.68893794250508 | -2.73554661798227 |
| H  | 6.84122297114970  | 1.56947054517060  | -2.89226236753362 |
| H  | 9.14154033710050  | 4.17364880596636  | -2.83429851940073 |
| H  | 12.74221264395322 | 6.97933835893045  | -2.35690694621153 |
| H  | 15.44222057899444 | 9.08028049153069  | -2.09460104727164 |
| H  | 19.96988304498679 | 9.71813848796538  | -1.51490144677148 |
| H  | 24.35339087652715 | 8.90292757064545  | -0.75969528575781 |



|   |                   |                   |                  |
|---|-------------------|-------------------|------------------|
| H | 32.34081662313746 | -1.89425116391297 | 1.16873800157398 |
| H | 23.84855028408041 | -8.83510276830964 | 0.05850923063364 |
| H | 16.54677174946757 | -2.38284696543131 | 4.56452524836881 |
| H | 19.19558642194722 | -0.42299223026977 | 4.74598059184282 |

- **77 (H<sub>2</sub> absorbed)**

|    |                   |                   |                  |
|----|-------------------|-------------------|------------------|
| Si | 26.94251081639425 | 2.47044636161887  | 3.24402068839301 |
| Si | 26.86248597528080 | -2.21047275717438 | 3.48650658512254 |
| Si | 29.18636239783357 | 3.11263963610925  | 3.53153692531654 |
| Si | 29.08984586276374 | -2.88417093842516 | 3.83433608345821 |
| Si | 30.71425167955683 | 1.30022341090125  | 3.84196962345489 |
| Si | 19.00189529144497 | -0.91845433213450 | 3.35322782127157 |
| Si | 20.96170257582637 | 2.48624039944694  | 2.31055402945015 |
| Si | 20.88032221684918 | -2.13698836597320 | 2.60908858447245 |
| Si | 23.26491801910118 | 2.30565156966933  | 2.65878160113873 |
| Si | 23.19565386395210 | -1.97175899446536 | 2.92776398805008 |
| Si | 25.05134792020813 | 3.88745747341871  | 2.83985828204244 |
| Si | 24.98358029112880 | -5.97869574679199 | 3.36674404273135 |
| Si | 24.15955205830126 | 0.15735818145914  | 2.85773677584748 |
| Si | 25.24629878425252 | 6.25781068913653  | 2.74454365079159 |
| Si | 24.92052552116885 | -3.59934934077794 | 3.24592023608459 |
| Si | 26.45586745328345 | 0.13366969337150  | 3.28519339224515 |
| Si | 19.01416034672160 | -8.05953958718937 | 2.56189466423166 |
| Si | 17.14601685537115 | -6.59773480970771 | 2.21848342946070 |
| Si | 14.92324095196120 | -7.36482154445890 | 1.92244372884298 |
| Si | 13.13286829800158 | -5.80147534939976 | 1.57676768783097 |
| Si | 13.30454976286384 | -3.42617837703132 | 1.48393324911906 |
| Si | 11.43300407585264 | -1.97671228892223 | 1.10148739709579 |
| Si | 9.18574827056153  | -2.59757537225249 | 0.78277052626974 |
| Si | 7.67114964951309  | -0.78346420749411 | 0.43583857418128 |
| Si | 7.73329904792843  | 1.61402337015579  | 0.31933726736588 |
| Si | 9.33422998639616  | 3.38022932330813  | 0.48645768707474 |
| Si | 11.55241831324533 | 2.69008247932044  | 0.86136224040270 |
| Si | 11.98262015618432 | 0.34989651621381  | 1.07068211143211 |
| Si | 14.26116079382494 | 0.32448523815753  | 1.55765035548534 |
| Si | 15.22179193322258 | 2.44656663720739  | 1.46361600980647 |
| Si | 13.49903839396542 | 4.06791892887781  | 1.08529955135751 |
| Si | 13.41571363192518 | 6.44255260528786  | 0.95569576295584 |
| Si | 15.28462528035016 | 7.93109802350799  | 1.16322800345765 |
| Si | 17.45797245458594 | 7.06253926860016  | 1.53546661209189 |
| Si | 19.38183418674512 | 8.47254266012773  | 1.75770288543855 |
| Si | 21.24480918669124 | 7.00554427310420  | 2.10303936451624 |
| Si | 20.46388564080025 | 4.77747950092190  | 2.11471007650894 |

|    |                   |                   |                   |
|----|-------------------|-------------------|-------------------|
| Si | 18.14484176968814 | 4.81606415830755  | 1.76644425875602  |
| Si | 17.52876938452500 | 2.54910501154421  | 1.80116917389624  |
| Si | 19.05511784442725 | 1.43088808927177  | 3.20180595400665  |
| Si | 23.45411352736289 | 7.81080395505870  | 2.39052261518625  |
| Si | 30.67401146881640 | -1.09890621803642 | 3.96055799837962  |
| Si | 23.12658818125276 | -7.48666386920449 | 3.15417776686597  |
| Si | 20.94014885755173 | -6.65033021295058 | 2.78684893824279  |
| Si | 20.24878062538635 | -4.40235687925402 | 2.58641386128044  |
| Si | 17.92734786364925 | -4.37196134687235 | 2.24389855783686  |
| Si | 17.38787374388041 | -2.09109547970639 | 2.09504778746926  |
| Si | 15.09065077375396 | -1.84978658573800 | 1.72483789331965  |
| H  | 29.51101734313924 | 4.31243044941208  | 4.36637788238057  |
| H  | 29.37993774892182 | -4.00759928916963 | 4.78069463833402  |
| H  | 31.85876273184047 | 1.75099286884496  | 4.70169434737012  |
| H  | 26.00411708337951 | -6.52868323647544 | 4.31788584768550  |
| H  | 26.29562092442706 | 6.83744228322012  | 3.64536379414613  |
| H  | 18.86418250697599 | -9.24861595657843 | 3.46102834701993  |
| H  | 14.46978351338302 | -8.54339481570804 | 2.72954784341934  |
| H  | 11.85969701976714 | -6.31803030437670 | 2.17763623440559  |
| H  | 8.61424849325127  | -3.70678953810340 | 1.61020600834340  |
| H  | 6.31230674616721  | -1.15507204577473 | 0.95301864333228  |
| H  | 6.39681709919432  | 2.10251086504296  | 0.79630158302950  |
| H  | 8.81631022450176  | 4.58861090060129  | 1.20288019833110  |
| H  | 12.16652161549643 | 7.06340158905123  | 1.50579350946054  |
| H  | 14.89881194504440 | 9.20037095846531  | 1.86072027374897  |
| H  | 19.28358589624555 | 9.73382533947425  | 2.56072743648504  |
| H  | 23.65587651355769 | 9.07199598898078  | 3.17465062597858  |
| H  | 31.80913574214521 | -1.49883659447768 | 4.85717101596112  |
| H  | 23.28607034278705 | -8.67780895080179 | 4.04952303244698  |
| Si | 27.30241056677175 | 2.33577252694099  | 0.84010527118474  |
| Si | 27.21169605255885 | -2.33209537413454 | 1.08038632782219  |
| Si | 29.54272310317946 | 2.98294521141841  | 1.14765332153167  |
| Si | 29.43697565592911 | -3.00291205900680 | 1.44835498013345  |
| Si | 31.06992690933732 | 1.17735287309052  | 1.48560735314599  |
| Si | 19.61105250216475 | -0.86912785762042 | -0.71138942124108 |
| Si | 21.30599937414677 | 2.36021369033579  | -0.11855701220223 |
| Si | 21.24989183604917 | -2.24846060138012 | 0.17039795967351  |
| Si | 23.60814939733918 | 2.19410657858324  | 0.26873744056520  |
| Si | 23.55004522592013 | -2.08812118902596 | 0.54363233336089  |
| Si | 25.40846164520057 | 3.75707812566473  | 0.46873059592382  |
| Si | 25.34393116825659 | -6.09431804917237 | 0.98553217252443  |
| Si | 24.48751330337749 | 0.04199738304910  | 0.44988212135930  |
| Si | 25.60355621596798 | 6.12728851238947  | 0.36326076277222  |
| Si | 25.26841954061511 | -3.71914172017700 | 0.87252245950924  |

|    |                   |                   |                   |
|----|-------------------|-------------------|-------------------|
| Si | 26.77732393498866 | 0.00757690644450  | 0.88912272907059  |
| Si | 19.37302986337089 | -8.16040766967578 | 0.17146154802039  |
| Si | 17.50137243997066 | -6.70175636900308 | -0.16979740504633 |
| Si | 15.28198505233223 | -7.48134436169352 | -0.46023005781347 |
| Si | 13.49796121919697 | -5.91494785849642 | -0.80385749631538 |
| Si | 13.67773851295698 | -3.54366733768691 | -0.88530594328363 |
| Si | 11.79981144115763 | -2.11249119701993 | -1.30141136197018 |
| Si | 9.55159848164598  | -2.73448945302832 | -1.59919317669653 |
| Si | 8.04168806798243  | -0.90826918927719 | -1.91840979529118 |
| Si | 8.09688309919266  | 1.49115010064800  | -2.03548105995235 |
| Si | 9.69040566587776  | 3.26734980239284  | -1.89795240054192 |
| Si | 11.90798214825423 | 2.56936105554995  | -1.54354373845175 |
| Si | 12.27706813450448 | 0.22454349605585  | -1.32990259690412 |
| Si | 14.56551384004076 | 0.21049497102914  | -0.85454816378928 |
| Si | 15.57963022943354 | 2.31358167451901  | -0.92441892527672 |
| Si | 13.86228053030255 | 3.93467642694059  | -1.28420399633971 |
| Si | 13.78378651521128 | 6.30986462970681  | -1.42413226837417 |
| Si | 15.64792257304878 | 7.80558240501424  | -1.21919561993875 |
| Si | 17.82169902469785 | 6.94052088931403  | -0.85227352939496 |
| Si | 19.74065765391623 | 8.35589966457421  | -0.62851525022941 |
| Si | 21.59669617174653 | 6.88165170930547  | -0.28731544344212 |
| Si | 20.81055916915696 | 4.65865324186421  | -0.24131117713926 |
| Si | 18.48782091907868 | 4.69258400118560  | -0.58978120808891 |
| Si | 17.90157469319712 | 2.40891626068086  | -0.62327305287667 |
| Si | 19.75044060536432 | 1.22151515718518  | -1.46425011088009 |
| Si | 23.80820867166567 | 7.67776014852686  | 0.00706793361450  |
| Si | 31.02265574672388 | -1.22124019041255 | 1.60315363113385  |
| Si | 23.48506465990215 | -7.59607105498324 | 0.77099086877108  |
| Si | 21.29993824792997 | -6.75364373256875 | 0.40008320357924  |
| Si | 20.59431677310649 | -4.50533452591772 | 0.22916689083200  |
| Si | 18.27676084541450 | -4.46994345920371 | -0.11333886421859 |
| Si | 17.74265750073302 | -2.18891702774655 | -0.34492676044329 |
| Si | 15.43883479597933 | -1.94610866383197 | -0.65923309307026 |
| H  | 30.10371847303731 | 4.09678639560573  | 0.31932438618317  |
| H  | 29.96457671752386 | -4.21010340671403 | 0.73694238710240  |
| H  | 32.42379807621984 | 1.55399038045208  | 0.95920362227122  |
| H  | 26.59472541625320 | -6.70790357619078 | 0.43140800489672  |
| H  | 26.87838573500590 | 6.62652298189071  | -0.24828686626469 |
| H  | 19.47325930327608 | -9.42496275985780 | -0.62597674126322 |
| H  | 15.07435393164453 | -8.73733425710641 | -1.25060579690486 |
| H  | 12.44821216694517 | -6.48789937230543 | -1.70819802727131 |
| H  | 9.21924780240307  | -3.93368925089704 | -2.43186740125445 |
| H  | 6.89944825181631  | -1.35148473143463 | -2.78509749162119 |
| H  | 6.96961145675484  | 1.89647381510038  | -2.93952053735320 |

|   |                   |                   |                   |
|---|-------------------|-------------------|-------------------|
| H | 9.41138622826444  | 4.39426864917008  | -2.84338669001937 |
| H | 12.76494011239880 | 6.84387184797274  | -2.38595957770563 |
| H | 15.49846187736002 | 8.99081715349665  | -2.12412810989142 |
| H | 19.89297738936340 | 9.54022860634689  | -1.53338244730626 |
| H | 24.25474744934666 | 8.85043771898037  | -0.81248541408129 |
| H | 32.35953120455682 | -1.70074438451706 | 1.11820686304848  |
| H | 23.87780401234174 | -8.86066498271436 | 0.06946307580847  |
| H | 18.85972058463315 | 1.94339739596501  | 4.59753662854192  |
| H | 18.78604869137726 | -1.26611561636086 | 4.79726238585293  |

- **Hck-COOH**

|    |                    |                   |                   |
|----|--------------------|-------------------|-------------------|
| Si | -7.94284272180993  | 2.37336154432246  | -1.27587672349791 |
| Si | -7.71541352451134  | -2.25885021393511 | -1.33377019867378 |
| Si | -10.24449912904386 | 2.87604808927650  | -1.30253663127215 |
| Si | -9.92548848674065  | -3.06708695040730 | -1.36825220753772 |
| Si | -11.73777264513438 | 1.01242210468825  | -1.33442898345067 |
| Si | 0.30665516604223   | -1.24450976368121 | -1.26329855468591 |
| Si | -1.91767716728945  | 2.58734851985040  | -1.21608505132907 |
| Si | -1.66273585763078  | -2.61972712063746 | -1.23827309229979 |
| Si | -4.24021815312583  | 2.39414295564906  | -1.22293007696271 |
| Si | -3.93096471339321  | -1.95765861708936 | -1.25569540047895 |
| Si | -6.08705226398354  | 3.89776097783879  | -1.22679856231619 |
| Si | -5.7866226216555   | -5.93661049191600 | -1.37548282809815 |
| Si | -4.94441836620169  | 0.17039479269145  | -1.30110865648516 |
| Si | -6.12032843378506  | 6.28547835317601  | -1.20931824970421 |
| Si | -5.70306702059385  | -3.55874072904004 | -1.31571281295722 |
| Si | -7.28715295638285  | 0.07883958694453  | -1.28863511347428 |
| Si | 0.11524572046475   | -7.90243405866848 | -1.35515088743267 |
| Si | 1.91944710496089   | -6.33513271102226 | -1.35984866366067 |
| Si | 4.08288014093643   | -7.30457679704259 | -1.40468151830009 |
| Si | 5.99723141904311   | -5.88139855729571 | -1.37913859831464 |
| Si | 5.76233704891564   | -3.52542059819609 | -1.30172264678912 |
| Si | 7.76917078286918   | -2.22534034208248 | -1.35803397610278 |
| Si | 9.99444278859557   | -2.98771814794845 | -1.40540139880105 |
| Si | 11.62608383825585  | -1.24245281554866 | -1.40337586333742 |
| Si | 11.64493731550265  | 1.15872414389112  | -1.37000393379358 |
| Si | 10.08204884277517  | 2.96386407698670  | -1.32442890518380 |
| Si | 7.80126116583004   | 2.37797112736622  | -1.28773353898392 |
| Si | 7.23661524257467   | 0.07242226944359  | -1.28826895098047 |
| Si | 4.89181123087763   | -0.01778780510936 | -1.16281343228925 |
| Si | 4.10320730882620   | 2.19482748479735  | -1.21070791046740 |
| Si | 5.86645171595467   | 3.79588326213327  | -1.22103006287057 |
| Si | 5.90604854704048   | 6.18835086885092  | -1.21327552868013 |

|    |                    |                   |                   |
|----|--------------------|-------------------|-------------------|
| Si | 4.10299621167387   | 7.77863457591320  | -1.18910449611579 |
| Si | 1.83235062660589   | 7.08875983816733  | -1.19147726259996 |
| Si | -0.08856392143965  | 8.53005379572922  | -1.18139968241430 |
| Si | -1.98666607242752  | 7.05881455227830  | -1.18867787034654 |
| Si | -1.21558633707925  | 4.82507820727464  | -1.19117889410128 |
| Si | 1.12290487752007   | 4.83682068997780  | -1.18739525714114 |
| Si | 1.80818543579368   | 2.58941315397848  | -1.20625852799269 |
| Si | -0.04866064516364  | 1.10406975385889  | -1.20656448324967 |
| Si | -4.24667128009261  | 7.79268631023903  | -1.18805299732353 |
| Si | -11.62137095734733 | -1.38538996513329 | -1.36089124471105 |
| Si | -3.87480604295617  | -7.38412692335207 | -1.37373966400085 |
| Si | -1.72220566612666  | -6.39683139365829 | -1.28887061942118 |
| Si | -1.17696988780431  | -4.50367131583967 | -2.51422890703634 |
| Si | 1.03964130146960   | -4.28059114261430 | -2.02349085480250 |
| Si | 1.94702159250484   | -2.26380180144777 | -2.64623297804315 |
| Si | 3.81667252224562   | -2.13750909687574 | -1.25622782202767 |
| Si | -7.98377952829970  | 2.35476252069583  | 1.15848841542527  |
| Si | -7.75839427974418  | -2.29132484327742 | 1.10178175315076  |
| Si | -10.28615959553646 | 2.85425372505789  | 1.10842415558380  |
| Si | -9.96773999357914  | -3.09705145684551 | 1.04753813659457  |
| Si | -11.77463473069820 | 0.98638023560834  | 1.05067804675535  |
| Si | 0.24387295357896   | -1.19823141922435 | 1.16173709148687  |
| Si | -1.94278674149704  | 2.58285068990873  | 1.22233850260790  |
| Si | -1.75518220442238  | -2.50221647133095 | 1.18208503261976  |
| Si | -4.26920833437580  | 2.38166775527690  | 1.20360998182708  |
| Si | -4.03276172238187  | -1.97449769102805 | 1.16351725048944  |
| Si | -6.12178796362171  | 3.87841054782696  | 1.18063379938550  |
| Si | -5.84685804029816  | -5.99578217787567 | 1.03482768903730  |
| Si | -5.00625185854105  | 0.16764672218854  | 1.11448202217736  |
| Si | -6.13457323350220  | 6.26700599942103  | 1.19842007574814  |
| Si | -5.76015041133008  | -3.61565109993729 | 1.08291349097896  |
| Si | -7.34906541987113  | 0.05415530704218  | 1.12874909042607  |
| Si | 0.11601736042176   | -8.02227524288303 | 1.02826172238003  |
| Si | 1.96506745911249   | -6.51953993223896 | 1.05697256689328  |
| Si | 4.13880963162980   | -7.43041480490063 | 0.98749883729620  |
| Si | 6.02695390162863   | -5.96284312213798 | 1.02469559859915  |
| Si | 5.84510100717541   | -3.59861426183283 | 1.09596524311171  |
| Si | 7.82826520574173   | -2.25837478965436 | 1.07614678046460  |
| Si | 10.05399757047454  | -3.01959776906294 | 1.01143854261326  |
| Si | 11.68319667677201  | -1.27415107763976 | 0.98240318019277  |
| Si | 11.69436167849500  | 1.12670029573156  | 1.01501368416043  |
| Si | 10.13371518354253  | 2.93497249748466  | 1.08706128427533  |
| Si | 7.84837156450390   | 2.35961012713654  | 1.14610893287727  |
| Si | 7.27446167932539   | 0.04720159968303  | 1.12725770925482  |

|    |                    |                   |                   |
|----|--------------------|-------------------|-------------------|
| Si | 4.93272839256682   | 0.00275315518566  | 1.24283538074997  |
| Si | 4.13070912715940   | 2.20567814754088  | 1.21094338178871  |
| Si | 5.91293907212403   | 3.78838617083191  | 1.18956611400470  |
| Si | 5.93018783912687   | 6.18162676394145  | 1.19697964205194  |
| Si | 4.11266626437077   | 7.76070231797704  | 1.21962347606649  |
| Si | 1.83513388902236   | 7.08265728079182  | 1.23136916446063  |
| Si | -0.08849090809619  | 8.52460451028610  | 1.23192598251011  |
| Si | -1.98949800584231  | 7.05284223324389  | 1.22980406067962  |
| Si | -1.22178633373672  | 4.81697589032023  | 1.22141760530342  |
| Si | 1.11875047484065   | 4.83274031953201  | 1.21799662286750  |
| Si | 1.83123194241205   | 2.59461148410258  | 1.22419597662777  |
| Si | -0.04309516586605  | 1.13634646806827  | 1.21831961220098  |
| Si | -4.25553469050498  | 7.77340279367533  | 1.22073768387084  |
| Si | -11.65928416210757 | -1.41160185046082 | 1.02680070462405  |
| Si | -3.97421116627116  | -7.48857106355985 | 1.02186033823916  |
| Si | -1.79330763005418  | -6.60851261644337 | 1.12143402845134  |
| Si | -1.14086017528556  | -4.57145666788493 | 1.94565401570688  |
| Si | 1.20430641579650   | -4.59301725017487 | 2.08928750728427  |
| Si | 1.94814350559324   | -2.36872937949249 | 2.29539847386714  |
| Si | 3.96710311599439   | -2.14392142426511 | 1.16728679476537  |
| C  | 0.44332536607362   | -4.88235380166119 | 3.86882140424026  |
| O  | -0.83078225607391  | -4.73349049140888 | 3.83262002115271  |
| O  | 0.94835336369176   | -5.13366471262301 | 5.06058559299824  |
| H  | -10.71673218159767 | 4.02722571288454  | -2.13544977018631 |
| H  | -10.26166261144143 | -4.24982997039100 | -2.22289048566036 |
| H  | -13.00076883750381 | 1.39313103967352  | -2.04989807632332 |
| H  | -6.91603194832791  | -6.50875785894682 | -2.17918503760107 |
| H  | -7.26760010098455  | 6.89330842211438  | -1.95989793686758 |
| H  | 0.15903534962686   | -9.06240832072196 | -2.29827231362005 |
| H  | 4.20035517441047   | -8.51641361299029 | -2.27529619598454 |
| H  | 7.12120223472159   | -6.40954206297311 | -2.21803749191402 |
| H  | 10.36466548402236  | -4.15590263542601 | -2.26629745298340 |
| H  | 12.85186558877815  | -1.68454692070091 | -2.14732874515009 |
| H  | 12.88966128943468  | 1.58881106980743  | -2.08966284606243 |
| H  | 10.50852649998464  | 4.13605251955501  | -2.15296805770854 |
| H  | 7.07342447931787   | 6.76313972859502  | -1.95993642094044 |
| H  | 4.45809362721049   | 9.00259809722320  | -1.97773724077395 |
| H  | -0.10244404657014  | 9.75831553484812  | -2.03896524834935 |
| H  | -4.55848214452959  | 9.03421346731639  | -1.96777871651487 |
| H  | -12.83494964774056 | -1.87696981601254 | -2.09384736435394 |
| H  | -4.06722019831333  | -8.58701648752769 | -2.24491552084258 |
| H  | -10.79712393505825 | 3.98629865874727  | 1.94477676440901  |
| H  | -10.33251307001671 | -4.29883624572784 | 1.86327412204001  |
| H  | -13.05951139350088 | 1.34968459656741  | 1.73574680522606  |

|   |                    |                   |                  |
|---|--------------------|-------------------|------------------|
| H | -6.99659290006352  | -6.60209068884189 | 1.78355147425950 |
| H | -7.28312418314666  | 6.87809589339334  | 1.94475016419644 |
| H | 0.19211907891036   | -9.23764306317513 | 1.89747243889114 |
| H | 4.32288535692068   | -8.69635622332908 | 1.76644931256252 |
| H | 7.14705385814790   | -6.55230042139011 | 1.82911677147743 |
| H | 10.45714207482860  | -4.20913029341845 | 1.82773894834176 |
| H | 12.94282297446581  | -1.73198345743906 | 1.65719183989428 |
| H | 12.96703894494865  | 1.54050138166710  | 1.69451502234702 |
| H | 10.61170129119918  | 4.08134755213344  | 1.92389290677732 |
| H | 7.10167842385882   | 6.77206191175951  | 1.92512595440108 |
| H | 4.47710436702221   | 8.97187122658313  | 2.02400004945148 |
| H | -0.10248304894870  | 9.74788020665450  | 2.09682031700341 |
| H | -4.58375607464632  | 8.99944788094822  | 2.01834704864859 |
| H | -12.89520228796978 | -1.91731992843495 | 1.71130863356047 |
| H | -4.19287554980964  | -8.74728013792133 | 1.80225153489461 |
| H | 2.00341895682945   | -2.11187135834863 | 3.77258804300939 |
| H | 1.92137058084423   | -5.21076421425162 | 4.98495709005924 |

- **Hck-HCOOH**

|    |                    |                   |                   |
|----|--------------------|-------------------|-------------------|
| Si | -8.00431126101606  | 2.32865877050327  | -1.23180841921865 |
| Si | -7.67496603585925  | -2.30975069385042 | -1.28194366280565 |
| Si | -10.31921259851220 | 2.77225481785491  | -1.21471184676336 |
| Si | -9.86537432506854  | -3.16952266394313 | -1.27472195087810 |
| Si | -11.76445657519957 | 0.87049305628403  | -1.21334630729343 |
| Si | 0.30340254847879   | -1.14535564516639 | -1.35577426638207 |
| Si | -1.98048475133163  | 2.61200211658524  | -1.28123256783637 |
| Si | -1.64156986226305  | -2.51658949455591 | -1.27155039146560 |
| Si | -4.30405615411495  | 2.42527459479520  | -1.26227441340780 |
| Si | -3.92091126955645  | -1.91439085614924 | -1.29188583727541 |
| Si | -6.18064502820459  | 3.89388153225240  | -1.21960057344728 |
| Si | -5.70205364446152  | -5.95680228131473 | -1.31657849156069 |
| Si | -4.97088854460060  | 0.19043619576194  | -1.32350328055944 |
| Si | -6.19677315192898  | 6.28183160830376  | -1.18870715733365 |
| Si | -5.64064222271266  | -3.57457495674615 | -1.28860322642210 |
| Si | -7.30821561954689  | 0.04205998935358  | -1.25423274415070 |
| Si | 0.22402836756910   | -7.92331521449339 | -1.27527223145324 |
| Si | 2.01540690055509   | -6.34555632081335 | -1.33616491835573 |
| Si | 4.18806094939733   | -7.25549725269559 | -1.40646027185764 |
| Si | 6.04852442754219   | -5.76621125069200 | -1.40504431086817 |
| Si | 5.82641355327920   | -3.40587463868714 | -1.37500542801936 |
| Si | 7.84887072744177   | -2.12967629333108 | -1.38176490429948 |
| Si | 10.06356544463301  | -2.91617987079920 | -1.38781947921915 |
| Si | 11.68067776537436  | -1.15811300034885 | -1.34739698045456 |

|    |                    |                   |                   |
|----|--------------------|-------------------|-------------------|
| Si | 11.68587070598179  | 1.24354751153483  | -1.31199278547301 |
| Si | 10.13597744043042  | 3.06164642230970  | -1.29771808010564 |
| Si | 7.84995737970699   | 2.48874261010829  | -1.32229472613658 |
| Si | 7.31227778264451   | 0.17526364373378  | -1.35444114952534 |
| Si | 4.96648388414219   | 0.11082150779401  | -1.44974954827419 |
| Si | 4.10359504051074   | 2.28527555254235  | -1.33603284263149 |
| Si | 5.88279400270179   | 3.87139493294387  | -1.29822421988138 |
| Si | 5.86768726100799   | 6.26454799862628  | -1.24668977638588 |
| Si | 4.04124230835477   | 7.82809090925003  | -1.21311703508571 |
| Si | 1.77442930600175   | 7.12091743808207  | -1.22137856346435 |
| Si | -0.16075332103853  | 8.54771884057868  | -1.18235540263240 |
| Si | -2.05007766321866  | 7.06603258737931  | -1.20316335345912 |
| Si | -1.25902127560246  | 4.84113668636363  | -1.23827928414879 |
| Si | 1.07858395047501   | 4.86713405432264  | -1.25415738118171 |
| Si | 1.79858748705340   | 2.63362587163841  | -1.31438455974844 |
| Si | -0.07794139965848  | 1.17313727391758  | -1.32630371940365 |
| Si | -4.31543005571405  | 7.78566618285763  | -1.17477121367791 |
| Si | -11.59610457371576 | -1.52428376756738 | -1.23790192411659 |
| Si | -3.80331071121971  | -7.41993713163631 | -1.31860066510241 |
| Si | -1.64576143292559  | -6.46337169487043 | -1.25883834973425 |
| Si | -1.07026913487559  | -4.49298372333677 | -2.33790538659697 |
| Si | 1.13650100548095   | -4.32438085578803 | -2.01429080586450 |
| Si | 1.92310553008948   | -2.25047666991915 | -2.61527906436115 |
| Si | 3.95532085228833   | -1.98075888554713 | -1.63455416378401 |
| Si | -8.00130586301683  | 2.31118645998672  | 1.20306107413632  |
| Si | -7.67399339944484  | -2.33645100468526 | 1.15535771344168  |
| Si | -10.31510269639071 | 2.75752835294562  | 1.19574401425231  |
| Si | -9.86176073186121  | -3.19825607175053 | 1.14127194102383  |
| Si | -11.75339835831243 | 0.84914910763724  | 1.17162898869530  |
| Si | 0.31577269261016   | -1.19240662727732 | 1.14968956345793  |
| Si | -1.96705136939357  | 2.56476831597015  | 1.15209865891747  |
| Si | -1.66595165885677  | -2.49895427362084 | 1.13829180305226  |
| Si | -4.29489999263481  | 2.39370116559970  | 1.16080117845098  |
| Si | -3.94121001068555  | -1.92574049202394 | 1.12772536993516  |
| Si | -6.16641866233437  | 3.86543905848136  | 1.18850356558452  |
| Si | -5.71246279602086  | -5.98129995153972 | 1.09482854914338  |
| Si | -5.00470054734630  | 0.17305622452648  | 1.09565620390130  |
| Si | -6.18756487819973  | 6.25128005281409  | 1.21841296013333  |
| Si | -5.64040002070798  | -3.59996682239874 | 1.11163856592064  |
| Si | -7.34316787372023  | 0.01831742714380  | 1.16409784307590  |
| Si | 0.23709594412633   | -7.91454802094447 | 1.12301278706730  |
| Si | 2.06094557985105   | -6.37331479086602 | 1.07878978603593  |
| Si | 4.21947451442302   | -7.32621697937376 | 0.99317023995639  |
| Si | 6.06670854132268   | -5.81002744236679 | 0.99317549478186  |



|    |                    |                   |                   |
|----|--------------------|-------------------|-------------------|
| Si | 5.83085197704247   | -3.45030909987561 | 1.04986557224738  |
| Si | 7.84953759995514   | -2.16617583595142 | 1.04876225607217  |
| Si | 10.06474939478993  | -2.94949729532472 | 1.03164533808735  |
| Si | 11.68393837858456  | -1.19296347754727 | 1.03913027052785  |
| Si | 11.68759528107291  | 1.20797619346539  | 1.07409406709925  |
| Si | 10.13288434785094  | 3.02106775966041  | 1.11542569698883  |
| Si | 7.84730862637294   | 2.44649462689211  | 1.11407465389858  |
| Si | 7.32468961556721   | 0.13557240867231  | 1.04771499922527  |
| Si | 4.97508668332427   | 0.04256817091043  | 0.97492237763822  |
| Si | 4.11386840610269   | 2.22308759496801  | 1.08410676702415  |
| Si | 5.88108761762233   | 3.82151188143352  | 1.11259449554465  |
| Si | 5.86823341517348   | 6.21462652192931  | 1.16418628503599  |
| Si | 4.04920318982947   | 7.78488729672702  | 1.19829864567274  |
| Si | 1.78398993907255   | 7.07490856305019  | 1.19878259460217  |
| Si | -0.15000575446081  | 8.50318633432010  | 1.23200695674720  |
| Si | -2.04086317969953  | 7.02394138283618  | 1.21924049715382  |
| Si | -1.25076010053383  | 4.79735039043624  | 1.17387774544418  |
| Si | 1.08844746430049   | 4.81999636254852  | 1.15144168294282  |
| Si | 1.81423223364148   | 2.58566718839684  | 1.11662098474181  |
| Si | -0.06096178148676  | 1.12897686731723  | 1.10642059328782  |
| Si | -4.30477849224545  | 7.75104378511541  | 1.23282071589473  |
| Si | -11.58711027004243 | -1.54693458259486 | 1.15002883887555  |
| Si | -3.82718395775755  | -7.45846990897479 | 1.08437368503934  |
| Si | -1.67092901719480  | -6.50830600181428 | 1.14434165370428  |
| Si | -1.00414468144975  | -4.50390960591623 | 2.07591193910663  |
| Si | 1.32666715479663   | -4.51255275608745 | 2.24496619712733  |
| Si | 1.98119503674133   | -2.28146835643685 | 2.37093861724975  |
| Si | 3.95129844001395   | -2.04219416292156 | 1.29121270578102  |
| C  | 0.47577431424984   | -5.07719162089343 | 3.97516633809488  |
| O  | -0.83616854094042  | -4.55461844781001 | 3.80811814113377  |
| O  | 0.35153269385615   | -6.50011621105722 | 4.04838135060007  |
| H  | -10.83442111407635 | 3.90780697380147  | -2.04347836154340 |
| H  | -10.18955299544669 | -4.35916740529714 | -2.12429624943633 |
| H  | -13.05001548813859 | 1.22193370880525  | -1.90320338038772 |
| H  | -6.84388266833277  | -6.53952683881449 | -2.09533174538972 |
| H  | -7.34052433562749  | 6.90929515843409  | -1.92839876380312 |
| H  | 0.28009774052171   | -9.08481632227709 | -2.21757367843069 |
| H  | 4.36753553368175   | -8.45641605743645 | -2.28155224550373 |
| H  | 7.20095381815415   | -6.24156380910452 | -2.23680104449508 |
| H  | 10.44842479952188  | -4.07861818812910 | -2.24949186908359 |
| H  | 12.92687440211639  | -1.58784897425419 | -2.06370259815476 |
| H  | 12.94775225102314  | 1.67294820868578  | -2.00131752747934 |
| H  | 10.59848833693073  | 4.23235369037335  | -2.10852079226223 |
| H  | 7.03063184678627   | 6.87523602350384  | -1.97142164009008 |

|   |                    |                   |                   |
|---|--------------------|-------------------|-------------------|
| H | 4.38847234334537   | 9.06220557010601  | -1.98922289084438 |
| H | -0.18677672289685  | 9.78850819543542  | -2.02129362198205 |
| H | -4.63772185915861  | 9.03291881250445  | -1.94098869374841 |
| H | -12.81290843077382 | -2.04255662889933 | -1.94673826485823 |
| H | -4.01451290210064  | -8.63216986458639 | -2.17251416830194 |
| H | -10.83685942184156 | 3.87904447469058  | 2.03941774515200  |
| H | -10.18432854188036 | -4.40713456500573 | 1.96376020722402  |
| H | -13.03351603754428 | 1.18455051726270  | 1.87947809622391  |
| H | -6.86459194854803  | -6.56536938186520 | 1.85692985579760  |
| H | -7.32721762420743  | 6.85658838473920  | 1.98232523846265  |
| H | 0.31621588910162   | -9.12408392803528 | 1.99860708732449  |
| H | 4.47831303229853   | -8.56816147256213 | 1.78960718825279  |
| H | 7.24235488352321   | -6.29696771852999 | 1.78533684344595  |
| H | 10.45023917050272  | -4.13698151227903 | 1.85817674787399  |
| H | 12.93110929352288  | -1.64578200317776 | 1.73931075669615  |
| H | 12.94866089778079  | 1.62139637102674  | 1.77459486535693  |
| H | 10.58625352512101  | 4.16685290929653  | 1.96597451964778  |
| H | 7.03660516595561   | 6.78478320767670  | 1.91280391298890  |
| H | 4.40411238347977   | 8.98910946032855  | 2.01672934668010  |
| H | -0.16214444243333  | 9.71276268460127  | 2.11573018319468  |
| H | -4.61396053299428  | 8.97669312475297  | 2.03821091682693  |
| H | -12.80055654529563 | -2.07353051991122 | 1.85843715815727  |
| H | -4.04944357618569  | -8.69701161014926 | 1.89512709727229  |
| H | 0.89960056200971   | -4.67370049878878 | 4.91658594632402  |
| H | 1.22872085575358   | -6.86522537407857 | 4.27168552144202  |

- **Hck-HOCHOH**

|    |                    |                   |                   |
|----|--------------------|-------------------|-------------------|
| Si | -7.87616657542188  | 2.24312806344328  | -1.30485738757262 |
| Si | -7.67294946414374  | -2.37215756408862 | -1.42481233991528 |
| Si | -10.17947293373622 | 2.73666728153669  | -1.27361670492369 |
| Si | -9.87062939817101  | -3.21269177106139 | -1.43920584286628 |
| Si | -11.66996607255082 | 0.87028316804521  | -1.31241203525534 |
| Si | 0.08166183866908   | -1.10988991765767 | -1.59674259356308 |
| Si | -1.88309266012674  | 2.62650799905525  | -1.33406067259150 |
| Si | -1.75685248420455  | -2.26700089397955 | -2.61608094849446 |
| Si | -4.17330304690432  | 2.19621892866731  | -1.29928048847271 |
| Si | -3.76737508845172  | -2.14490405951045 | -1.39230502216525 |
| Si | -5.99157656585231  | 3.73324958528428  | -1.23957240146678 |
| Si | -5.79694293075173  | -6.00731751919215 | -1.40154268476188 |
| Si | -4.88944767033853  | -0.04163496856113 | -1.25837026605220 |
| Si | -6.08814192562010  | 6.12518991820964  | -1.16924632922703 |
| Si | -5.63970945252833  | -3.63979318318102 | -1.41433501147135 |
| Si | -7.23799493788814  | -0.04750964192215 | -1.35664829916093 |

|    |                    |                   |                   |
|----|--------------------|-------------------|-------------------|
| Si | 0.11858241278010   | -7.59284088637165 | -1.17063408854963 |
| Si | 1.92453250062810   | -6.09651458034048 | -0.82133865073126 |
| Si | 3.96877332408036   | -7.17338965500192 | -1.30308798217748 |
| Si | 5.90152014706729   | -5.79719950254704 | -1.48087150365696 |
| Si | 5.68274552784821   | -3.41719490360048 | -1.53984225894691 |
| Si | 7.69977833520473   | -2.10697151435069 | -1.53284624770708 |
| Si | 9.91003299821359   | -2.91474477653188 | -1.52431208287276 |
| Si | 11.58587978459714  | -1.21509294582000 | -1.43887949056696 |
| Si | 11.66201445207105  | 1.18399956579595  | -1.35069601358355 |
| Si | 10.15286336550344  | 3.03647659632194  | -1.30245935705874 |
| Si | 7.85100508228253   | 2.52985521512165  | -1.36772538253742 |
| Si | 7.24731090539462   | 0.22514298292539  | -1.45787488606684 |
| Si | 4.90086014182990   | 0.22168761752762  | -1.44346093638421 |
| Si | 4.17248874859302   | 2.45322582154675  | -1.35642940157274 |
| Si | 5.96074663070448   | 4.02491628917060  | -1.29764779687620 |
| Si | 5.93040251356959   | 6.41737928730853  | -1.20890448011305 |
| Si | 4.05401968489167   | 7.92502967133242  | -1.13424684502438 |
| Si | 1.79029517319184   | 7.19914580080062  | -1.14049537599790 |
| Si | -0.15222562465338  | 8.61382056255910  | -1.07524242428456 |
| Si | -2.02641672876352  | 7.11492170988239  | -1.13430725459796 |
| Si | -1.25594869087057  | 4.88558544701502  | -1.21505716609293 |
| Si | 1.08505971984753   | 4.94932475273119  | -1.22157152885285 |
| Si | 1.85681834781215   | 2.74302869672326  | -1.34616880058294 |
| Si | 0.03130234618160   | 1.22786174144371  | -1.39930344878975 |
| Si | -4.31301587194766  | 7.74922217921316  | -1.10951142970146 |
| Si | -11.56420532102670 | -1.52830456125452 | -1.38062502716324 |
| Si | -3.79460346368130  | -7.28122940507660 | -1.32915532897121 |
| Si | -1.75532499921962  | -6.15015690306315 | -0.96995691402344 |
| Si | -0.98556364261945  | -4.02862677142687 | -1.44937177843332 |
| Si | 1.32597577666407   | -3.85143773707497 | -0.99328062792486 |
| Si | 1.79680736688531   | -2.33632788560331 | -2.75555413269835 |
| Si | 3.81486906894265   | -1.88387620605540 | -1.58223813961135 |
| Si | -7.86450373924764  | 2.17573578644991  | 1.12782270913177  |
| Si | -7.68444140042035  | -2.42228299472882 | 1.00774018893999  |
| Si | -10.17114118690319 | 2.66345258514577  | 1.13720896169023  |
| Si | -9.87753796782289  | -3.27486175111466 | 0.97789927160770  |
| Si | -11.66940752443515 | 0.80373273252747  | 1.07226861026750  |
| Si | -0.01432202029167  | -1.28691273557696 | 0.82239484905249  |
| Si | -1.84906233199362  | 2.51619748818759  | 1.09135579927124  |
| Si | -1.73637786498722  | -2.45062356240231 | 1.98865662191508  |
| Si | -4.15046800196077  | 2.14782713139322  | 1.12046114818653  |
| Si | -3.82501566564022  | -2.18816395364450 | 1.01749811091230  |
| Si | -5.98450364861130  | 3.67010353588488  | 1.17217954303155  |
| Si | -5.81511217318310  | -6.04654835052473 | 1.00575466027976  |

|    |                    |                   |                   |
|----|--------------------|-------------------|-------------------|
| Si | -4.85917935384986  | -0.07938188135174 | 1.14848934830353  |
| Si | -6.09513603175324  | 6.05758525041598  | 1.23938537792324  |
| Si | -5.65317433296869  | -3.68547663654909 | 0.98526963446106  |
| Si | -7.20144975114879  | -0.10766504529390 | 1.05819499884313  |
| Si | 0.11119208931080   | -8.09792595171020 | 1.15887534140525  |
| Si | 2.01571254937560   | -6.70860811903950 | 1.51666774858636  |
| Si | 4.21861273181545   | -7.45322226599039 | 1.05976294640041  |
| Si | 5.96398700648486   | -5.81468152014832 | 0.92974713348319  |
| Si | 5.70759835253533   | -3.47024596757655 | 0.85852195123313  |
| Si | 7.69462933821826   | -2.15904740882666 | 0.90251975826018  |
| Si | 9.89391341286150   | -2.98907291010259 | 0.89195989142564  |
| Si | 11.58015642450603  | -1.30021148282324 | 0.94746348174957  |
| Si | 11.65348927755472  | 1.09671208756532  | 1.03355353027928  |
| Si | 10.12742144335593  | 2.93108419590519  | 1.10595124333281  |
| Si | 7.82413647606680   | 2.43044812196794  | 1.06322036446150  |
| Si | 7.16992764788271   | 0.14361528888428  | 0.95735554532152  |
| Si | 4.81900986044253   | 0.17132249347211  | 0.95978027058086  |
| Si | 4.15627345528702   | 2.40959901219704  | 1.06168715003240  |
| Si | 5.96475739581188   | 3.94627478635589  | 1.11186258371603  |
| Si | 5.94802741159214   | 6.33409156976783  | 1.19844731270519  |
| Si | 4.07319793393682   | 7.84143991935786  | 1.27260253379287  |
| Si | 1.80688819603314   | 7.11471700156859  | 1.27652218513653  |
| Si | -0.14440341297235  | 8.52166831902624  | 1.33520589878477  |
| Si | -2.02618678157000  | 7.02345977253143  | 1.28543110690462  |
| Si | -1.24553247429858  | 4.79278001956700  | 1.18803934547412  |
| Si | 1.08981479034962   | 4.86706596882574  | 1.19321146355591  |
| Si | 1.85202174559390   | 2.65626441734915  | 1.09044066849471  |
| Si | 0.06352749386495   | 1.08032623272677  | 1.02173765139769  |
| Si | -4.31314836296801  | 7.67080066770092  | 1.29729696342973  |
| Si | -11.57329995288042 | -1.59428568769576 | 1.00551913151635  |
| Si | -3.94654295250000  | -7.54228441688375 | 1.04494003522966  |
| Si | -1.78284942668488  | -6.66349429203027 | 1.40343872022906  |
| Si | -1.03870498019807  | -4.67795592155940 | 2.30832257405300  |
| Si | 1.29670273776458   | -4.67457066756798 | 2.39689415055875  |
| Si | 1.75329109013442   | -2.78970946210850 | 1.14715668933368  |
| Si | 3.88376446970690   | -1.98716403168559 | 0.83977401532033  |
| C  | 0.90980427003866   | -4.64146127256062 | 4.33365101483252  |
| O  | -0.70722532356068  | -4.81777015717599 | 4.18445259390192  |
| O  | 1.37813622844452   | -5.62922724623037 | 5.12548088315891  |
| H  | -10.68078804585843 | 3.90276205053326  | -2.06804858565951 |
| H  | -10.21925279604502 | -4.38290963497348 | -2.30652068209797 |
| H  | -12.94562792733237 | 1.26047131812880  | -1.99996191719514 |
| H  | -6.86869980845032  | -6.64929203735029 | -2.22879463905187 |
| H  | -7.26915512471166  | 6.69983466973980  | -1.89421530030251 |

|   |                    |                   |                   |
|---|--------------------|-------------------|-------------------|
| H | 0.17337257838090   | -8.56030741707424 | -2.31001955796191 |
| H | 3.80651695773238   | -8.30667606414416 | -2.26740390777617 |
| H | 6.97606584938837   | -6.44867522313361 | -2.29949151150154 |
| H | 10.28823026178399  | -4.07685844997428 | -2.39026011303315 |
| H | 12.82122908149552  | -1.66492651328973 | -2.16247489566615 |
| H | 12.93626013253404  | 1.59579206194307  | -2.02854787397211 |
| H | 10.65834494536963  | 4.21531979568028  | -2.07544899955631 |
| H | 7.06783370842303   | 7.07707929767484  | -1.93121581608497 |
| H | 4.36420122214298   | 9.18943377290903  | -1.87736827418222 |
| H | -0.18238170618999  | 9.87243596871404  | -1.88699838860659 |
| H | -4.70041662120420  | 8.98377981881477  | -1.86601891201648 |
| H | -12.78728353244640 | -2.00446934623648 | -2.10776569562549 |
| H | -3.65386234457370  | -8.42375380726978 | -2.28491053075033 |
| H | -10.66412311489524 | 3.77992397968514  | 2.00511920656656  |
| H | -10.21051336834260 | -4.48942385832765 | 1.78897850514863  |
| H | -12.94142561041124 | 1.16403271453777  | 1.78280431826878  |
| H | -6.95576927029099  | -6.58987607628212 | 1.81341819753855  |
| H | -7.28187227097177  | 6.58271675185116  | 1.99197772625547  |
| H | 0.02422034375672   | -9.44144707806582 | 1.81192808319711  |
| H | 4.69118328373413   | -8.70363003011687 | 1.73773877217490  |
| H | 7.16720102712792   | -6.26216196070559 | 1.70550225136207  |
| H | 10.22436563337167  | -4.20482516850725 | 1.70246820417809  |
| H | 12.80566883926514  | -1.81329991968158 | 1.64530695871600  |
| H | 12.91636553510838  | 1.47063814135609  | 1.75342228422121  |
| H | 10.58850020655133  | 4.04490161400728  | 1.99468520127438  |
| H | 7.10095226528422   | 6.92605024316417  | 1.95388904437713  |
| H | 4.40419878322598   | 9.04756128613601  | 2.09913786236755  |
| H | -0.17175453871439  | 9.71459047684586  | 2.24141358283451  |
| H | -4.69541156246230  | 8.85463833303590  | 2.13350498381666  |
| H | -12.80047025816556 | -2.10942142474821 | 1.69852891619397  |
| H | -4.24638036905234  | -8.83558193175033 | 1.73747897370242  |
| H | 0.98572444092053   | -3.68077193521738 | 4.86633682260291  |
| H | 1.55551377261586   | -6.41915418022800 | 4.57024326975058  |
| H | -1.72197579108069  | -1.97320493103076 | 3.41808121837375  |
| H | -1.23779761711360  | -4.32774212690913 | 4.84893331633625  |

- **Hck-OCH-H<sub>2</sub>O**

|    |                    |                   |                   |
|----|--------------------|-------------------|-------------------|
| Si | -7.85789006745361  | 2.38461659258772  | -1.28779705243890 |
| Si | -7.71767285548049  | -2.23861169176685 | -1.44391918472916 |
| Si | -10.15348544810174 | 2.91326965453637  | -1.25870655261745 |
| Si | -9.92937966006614  | -3.04218145586277 | -1.46933866106469 |
| Si | -11.66889755939727 | 1.06721768655874  | -1.31579570126231 |
| Si | 0.07425476631153   | -1.08487305572601 | -1.57193302911997 |

|    |                    |                   |                   |
|----|--------------------|-------------------|-------------------|
| Si | -1.84529666820222  | 2.67138296110245  | -1.28385042971916 |
| Si | -1.77841014118094  | -2.23036406476717 | -2.58402635062773 |
| Si | -4.14647874210515  | 2.28831604715690  | -1.27422577090887 |
| Si | -3.81767474431133  | -2.05674138643268 | -1.41769814996424 |
| Si | -5.95030870742752  | 3.84597024842379  | -1.20396422336228 |
| Si | -5.86590998209160  | -5.90927684453148 | -1.41380311977258 |
| Si | -4.90175239459029  | 0.06335088998635  | -1.28973802234305 |
| Si | -6.01494270041037  | 6.23797564217647  | -1.10384374613486 |
| Si | -5.70397085335263  | -3.53952103331294 | -1.43844214673115 |
| Si | -7.24915586655968  | 0.08330025528651  | -1.36317194008686 |
| Si | 0.00210055496973   | -7.57031096905142 | -1.21066456914732 |
| Si | 1.85942079906060   | -6.12008448221584 | -0.92393534948153 |
| Si | 3.90736908559970   | -7.20135722966365 | -1.38214426252709 |
| Si | 5.85404043511736   | -5.83639321876965 | -1.50684054867653 |
| Si | 5.65428441043034   | -3.45695060090077 | -1.50675598510074 |
| Si | 7.68538163290767   | -2.17177993706098 | -1.46567125878254 |
| Si | 9.88549135826488   | -3.00710213254967 | -1.45897725472806 |
| Si | 11.58024150505265  | -1.32831017734599 | -1.33539288100048 |
| Si | 11.68105868948077  | 1.06799452659592  | -1.20865644986907 |
| Si | 10.19097242915170  | 2.93487219487765  | -1.14256551753956 |
| Si | 7.88388713026836   | 2.45504330049115  | -1.22614799862474 |
| Si | 7.25326195018211   | 0.16081464934232  | -1.35225179833951 |
| Si | 4.90689593803765   | 0.18411165228038  | -1.35553762337078 |
| Si | 4.20577793720931   | 2.42162040156560  | -1.24426841499579 |
| Si | 6.01137619786627   | 3.96996944559429  | -1.15132141667839 |
| Si | 6.01212774204022   | 6.36082632488001  | -1.03248069545639 |
| Si | 4.15640514003165   | 7.89366943245061  | -0.95600490656023 |
| Si | 1.88270398554513   | 7.19883716305002  | -0.99476738530601 |
| Si | -0.04465501414431  | 8.63358463883442  | -0.92625692305581 |
| Si | -1.93518348144901  | 7.15705531449317  | -1.02271429803438 |
| Si | -1.18932171768627  | 4.92041860191664  | -1.12843349208425 |
| Si | 1.15176767664071   | 4.95875297483309  | -1.11286328002085 |
| Si | 1.89554726548715   | 2.74477637710476  | -1.26039090984579 |
| Si | 0.05282069308618   | 1.25084156527309  | -1.34590225240049 |
| Si | -4.21076585180284  | 7.82855167840833  | -1.00918585700510 |
| Si | -11.59612423426095 | -1.33198572795463 | -1.40097708132479 |
| Si | -3.87641665464580  | -7.20122222796765 | -1.31533016376966 |
| Si | -1.83336092685597  | -6.09598860732984 | -0.90516700297005 |
| Si | -1.03659804813187  | -3.99226663462609 | -1.40641107091336 |
| Si | 1.28421360374390   | -3.86290069201269 | -1.00570500082759 |
| Si | 1.79126536048199   | -2.31580329935056 | -2.71871300778481 |
| Si | 3.80325667885079   | -1.90656055695012 | -1.52271826902843 |
| Si | -7.85806471803673  | 2.29471688636228  | 1.14433208479121  |
| Si | -7.73536323841483  | -2.30599847795705 | 0.98892475799282  |

|    |                    |                   |                  |
|----|--------------------|-------------------|------------------|
| Si | -10.15503758460787 | 2.82171723025721  | 1.15182380997303 |
| Si | -9.94153257965410  | -3.12338855046706 | 0.94719871760420 |
| Si | -11.67747951298413 | 0.98294682537849  | 1.06837379365738 |
| Si | -0.03625619318947  | -1.29444376014784 | 0.83916395923294 |
| Si | -1.82783702057427  | 2.52544584517233  | 1.14007710798165 |
| Si | -1.80097032317666  | -2.41744997779991 | 1.96910441015090 |
| Si | -4.13830092341184  | 2.21230337932385  | 1.14498956890856 |
| Si | -3.87436447355468  | -2.11247112995346 | 0.98717669543584 |
| Si | -5.95459348848946  | 3.75498601275449  | 1.20673938817681 |
| Si | -5.89387140565672  | -5.94682600239878 | 0.99418046141575 |
| Si | -4.89143121761418  | 0.00183162664633  | 1.12039819570892 |
| Si | -6.04028675781921  | 6.14034232551482  | 1.30371557780416 |
| Si | -5.71660304697026  | -3.58821123516312 | 0.96160360951623 |
| Si | -7.23423433871462  | 0.00288270587128  | 1.05229776094492 |
| Si | 0.00845443562400   | -8.10050971534336 | 1.11217310284002 |
| Si | 1.94831832581147   | -6.73666233864935 | 1.39356270586471 |
| Si | 4.14159857207296   | -7.52587553482650 | 0.97959849922411 |
| Si | 5.90685246351866   | -5.90669600504742 | 0.90339689164839 |
| Si | 5.66557408778920   | -3.55777435328900 | 0.88957248876048 |
| Si | 7.66583314106951   | -2.26692165759193 | 0.96844014499927 |
| Si | 9.85491780330689   | -3.12258456281240 | 0.95571763216267 |
| Si | 11.55646485179556  | -1.45094103575235 | 1.04930720205778 |
| Si | 11.65232044140855  | 0.94378333062294  | 1.17370859645784 |
| Si | 10.14933079139009  | 2.79693223230121  | 1.26413833430259 |
| Si | 7.84042865190706   | 2.32447016534622  | 1.20351847084603 |
| Si | 7.17153866938537   | 0.04275580101658  | 1.06131216579639 |
| Si | 4.82031423454816   | 0.09664309270148  | 1.04561253455432 |
| Si | 4.17267963528302   | 2.33888192302223  | 1.17302066085180 |
| Si | 5.99452912812966   | 3.85868600809569  | 1.25692962421372 |
| Si | 6.00758012693566   | 6.24618703926049  | 1.37398133631456 |
| Si | 4.15239398404883   | 7.77773338348047  | 1.44965676804841 |
| Si | 1.87755660449843   | 7.08047362842391  | 1.42073428787248 |
| Si | -0.05913624274329  | 8.50723238599964  | 1.48271878288897 |
| Si | -1.95675574658735  | 7.03169940570718  | 1.39556409340874 |
| Si | -1.19646837361329  | 4.79375925655146  | 1.27328815860069 |
| Si | 1.13940755292025   | 4.84222980828414  | 1.30066165280149 |
| Si | 1.87180841880672   | 2.62254130434735  | 1.17579281333348 |
| Si | 0.06877935388851   | 1.06792000696978  | 1.07469933228389 |
| Si | -4.23169514865153  | 7.72054894539246  | 1.39646229098717 |
| Si | -11.61055510138165 | -1.41572293472899 | 0.98443653640760 |
| Si | -4.05948167480077  | -7.48733392774943 | 1.05235066140675 |
| Si | -1.87992934294731  | -6.66412059184108 | 1.46492023935553 |
| Si | -1.12822139189649  | -4.64567420339496 | 2.29355230662380 |
| Si | 1.22282573235712   | -4.75649967043143 | 2.36340540970231 |

|    |                    |                   |                   |
|----|--------------------|-------------------|-------------------|
| Si | 1.71035680583731   | -2.83046857080058 | 1.16698019745089  |
| Si | 3.85843095848827   | -2.05035805295510 | 0.89979290793948  |
| C  | 0.56555959679658   | -4.75364597176599 | 4.18705822523634  |
| O  | -0.71439289491464  | -4.62674986660063 | 4.16540828673831  |
| O  | 0.70821154502809   | -7.14236297912627 | 4.56928147425081  |
| H  | -10.63679283463208 | 4.09117826220983  | -2.04679517919097 |
| H  | -10.29361364056751 | -4.19963605342037 | -2.34716526768790 |
| H  | -12.93663835269069 | 1.47956873598218  | -2.00497029974124 |
| H  | -6.93142005819064  | -6.55856579271670 | -2.24361303055477 |
| H  | -7.17814282199899  | 6.84230844070527  | -1.83330352107759 |
| H  | -0.04013892612902  | -8.53606339650761 | -2.35200295590008 |
| H  | 3.76344693047021   | -8.32474806448212 | -2.36068497264027 |
| H  | 6.92643523707480   | -6.47716311191853 | -2.33645877391093 |
| H  | 10.25301888221010  | -4.15867731985494 | -2.34330373662932 |
| H  | 12.81454638208927  | -1.78155651227516 | -2.05848767709213 |
| H  | 12.96486604329856  | 1.47688517588627  | -1.86988202404298 |
| H  | 10.71010242057613  | 4.11979569209567  | -1.89681699907100 |
| H  | 7.16564829872452   | 7.01238858062297  | -1.73626944629493 |
| H  | 4.49266456646496   | 9.16259165205023  | -1.67970417280910 |
| H  | -0.05494379695853  | 9.90353970419628  | -1.72055569819005 |
| H  | -4.56994897762403  | 9.07894733878910  | -1.75343865192966 |
| H  | -12.82527469663268 | -1.78405160011251 | -2.13323309868557 |
| H  | -3.71382515617799  | -8.33001013440330 | -2.28405921256768 |
| H  | -10.63152042838278 | 3.93926986447735  | 2.02727113233130  |
| H  | -10.29603034865394 | -4.33858751961523 | 1.74774377517271  |
| H  | -12.94717046452343 | 1.35310601155692  | 1.77777272753746  |
| H  | -7.05101284279595  | -6.46768883768153 | 1.79252731366441  |
| H  | -7.22395048603998  | 6.66902723067054  | 2.05822673666321  |
| H  | -0.04602234728039  | -9.44757198371031 | 1.76539602543392  |
| H  | 4.57312232458701   | -8.79784499157327 | 1.64411426588410  |
| H  | 7.09845078296897   | -6.38839048171702 | 1.67627184016669  |
| H  | 10.16923795331391  | -4.35519106854114 | 1.74677476338446  |
| H  | 12.77201217941388  | -1.98563680461189 | 1.74815093781659  |
| H  | 12.91417091358758  | 1.29108837476394  | 1.90846502285845  |
| H  | 10.62249214406255  | 3.89122190861325  | 2.17047003165753  |
| H  | 7.16142058710294   | 6.81381001134678  | 2.14635996676092  |
| H  | 4.49023882381655   | 8.96824970214562  | 2.29561972883404  |
| H  | -0.08034549993489  | 9.68722352198666  | 2.40569805966460  |
| H  | -4.59827353821823  | 8.90069861666330  | 2.24464131101620  |
| H  | -12.84656836142285 | -1.91903442861687 | 1.67025230183948  |
| H  | -4.41476318892463  | -8.77779400331068 | 1.72373443658702  |
| H  | 1.03360865100556   | -4.71629268621422 | 5.18613297685239  |
| H  | 1.32440073131650   | -7.50136135006556 | 3.89684046758952  |
| H  | -1.79798963272028  | -1.94666554169416 | 3.39399438192721  |



H -0.16883626993547 -7.39916278358664 4.22117580498007

• **Hck-OCH**

Si -7.85658976466492 2.38000437562575 -1.27772690106591  
Si -7.71873151429358 -2.23781199618143 -1.44739813656672  
Si -10.15170472649538 2.91053742152544 -1.24507932493307  
Si -9.93157165267594 -3.03846490307716 -1.47249745272871  
Si -11.67184106495445 1.06875636435107 -1.30581069327149  
Si 0.04595274114814 -1.08415714714910 -1.58122229814586  
Si -1.84417434947986 2.67098162735704 -1.28540495896327  
Si -1.78942948276295 -2.23256945894617 -2.61607186140791  
Si -4.14410734988810 2.27901357992350 -1.27079521646769  
Si -3.81172654445739 -2.06300799722422 -1.41993811945405  
Si -5.94641088045383 3.83704569932322 -1.19429062830544  
Si -5.87352197864255 -5.90528098832026 -1.43229343700440  
Si -4.89896423435821 0.05449154107111 -1.28076391263053  
Si -6.01003600015731 6.22900745418903 -1.09118289943235  
Si -5.70404708204920 -3.53679569810992 -1.44753575893902  
Si -7.24555983127092 0.08092764597534 -1.35973047657111  
Si -0.00394199400866 -7.58355517878949 -1.19709808288538  
Si 1.84728954350356 -6.12885879249937 -0.89710018289866  
Si 3.89371537226090 -7.20844318882244 -1.35358615764269  
Si 5.84280461830397 -5.84736577695448 -1.48756348924128  
Si 5.65574745768784 -3.46536012649516 -1.50204376098772  
Si 7.68374432579832 -2.17377441404855 -1.46239851321354  
Si 9.88441226435082 -3.00776723551030 -1.44770754307825  
Si 11.58002323040706 -1.33015587920014 -1.32338584366400  
Si 11.68424998964681 1.06611180212312 -1.20116767459285  
Si 10.19643935325461 2.93511028368005 -1.14124592908919  
Si 7.88880379458007 2.45802286885887 -1.22947669193585  
Si 7.25956340841313 0.16220286922777 -1.35479922237175  
Si 4.91405496673464 0.19468768644746 -1.36710378896725  
Si 4.20906943716091 2.43100160244123 -1.25648800671931  
Si 6.01784021946381 3.97654465626287 -1.15898303966401  
Si 6.01543867090558 6.36769118061644 -1.04065068235500  
Si 4.15610951212785 7.89686488955185 -0.96204526557636  
Si 1.88359549478914 7.19822395403060 -0.99752419369732  
Si -0.04391655280545 8.63255951131587 -0.92351868480090  
Si -1.93413693242864 7.15570986948634 -1.01853254822220  
Si -1.18800151575597 4.91966746759705 -1.12915551960043  
Si 1.15330590361508 4.95774676942758 -1.11766878908031  
Si 1.89699306103376 2.74339247531320 -1.27025665215005  
Si 0.05284712606477 1.25104774414930 -1.35220148475991

|    |                    |                   |                   |
|----|--------------------|-------------------|-------------------|
| Si | -4.21041062662209  | 7.82449125702794  | -0.99868971105628 |
| Si | -11.59973593222419 | -1.33003839452578 | -1.39788902965888 |
| Si | -3.88564538168368  | -7.20045941449627 | -1.33690402418229 |
| Si | -1.84010394793154  | -6.10135153066633 | -0.92790304107553 |
| Si | -1.04809114833542  | -3.99824571707395 | -1.44093750677255 |
| Si | 1.27232355488384   | -3.87937807980591 | -1.04645690701683 |
| Si | 1.79361363223922   | -2.29202140229049 | -2.71241352259760 |
| Si | 3.81933624200518   | -1.89797635218895 | -1.53283580522552 |
| Si | -7.85281766784358  | 2.28426829562734  | 1.15309525601102  |
| Si | -7.73407501526180  | -2.31067067857983 | 0.98471163507422  |
| Si | -10.14997026275450 | 2.81175309107770  | 1.16532627812682  |
| Si | -9.94129388843160  | -3.12574232495526 | 0.94411735542226  |
| Si | -11.67764683212490 | 0.97756463936601  | 1.07840019151485  |
| Si | -0.05674859984082  | -1.30035218577201 | 0.82774353366881  |
| Si | -1.82180949736076  | 2.51942009148340  | 1.13782202208361  |
| Si | -1.79636737630420  | -2.43904968815660 | 1.98592179712427  |
| Si | -4.13185354885340  | 2.19753228725903  | 1.14861316152067  |
| Si | -3.86367792930351  | -2.12976969353578 | 0.98793322668792  |
| Si | -5.94702185101459  | 3.74214065137556  | 1.21635817105778  |
| Si | -5.90563631214138  | -5.95143255249728 | 0.97524399308518  |
| Si | -4.88031156863413  | -0.01462856783088 | 1.13245071309876  |
| Si | -6.03101306051315  | 6.12828148591141  | 1.31613953504003  |
| Si | -5.71625822353766  | -3.59367364192937 | 0.95193795432708  |
| Si | -7.22213220755827  | -0.00540564504402 | 1.05794377785499  |
| Si | -0.01366436239973  | -8.11230832959288 | 1.12908714576727  |
| Si | 1.92750718073497   | -6.76013308156411 | 1.42735433619855  |
| Si | 4.12641881365179   | -7.52703377676936 | 1.01021476870217  |
| Si | 5.88955791620958   | -5.90506313299439 | 0.92295185817283  |
| Si | 5.65863601262173   | -3.55519010113456 | 0.89511986990147  |
| Si | 7.65787791472924   | -2.26371418004401 | 0.97244549559699  |
| Si | 9.84729684928609   | -3.11846489600796 | 0.96675413535545  |
| Si | 11.55040626151484  | -1.44824241696614 | 1.06157657515697  |
| Si | 11.65128433478937  | 0.94647790896323  | 1.18152272538714  |
| Si | 10.15053789201425  | 2.80150756714974  | 1.26544670251671  |
| Si | 7.84188686368349   | 2.32961684323007  | 1.20062877875007  |
| Si | 7.17308628294856   | 0.04793512924340  | 1.05960139601491  |
| Si | 4.82230297962558   | 0.11153990905873  | 1.03375745257736  |
| Si | 4.17455878769501   | 2.35208272053690  | 1.16169731768087  |
| Si | 5.99917351868251   | 3.86693685945341  | 1.24901373090443  |
| Si | 6.01331112947523   | 6.25368483387560  | 1.36561680784108  |
| Si | 4.15543923878320   | 7.78122174942024  | 1.44365492862780  |
| Si | 1.88269004189935   | 7.07722331501148  | 1.41790405883117  |
| Si | -0.05408272205995  | 8.50266007350286  | 1.48536512173025  |
| Si | -1.95132695518323  | 7.02625439209224  | 1.39957780806653  |

|    |                    |                   |                   |
|----|--------------------|-------------------|-------------------|
| Si | -1.19247289047341  | 4.78851826922006  | 1.27253879887290  |
| Si | 1.14318604646942   | 4.83929879428611  | 1.29437192142631  |
| Si | 1.87278312745526   | 2.61910370738503  | 1.16694830496472  |
| Si | 0.07264403787331   | 1.06053034397383  | 1.06909178942189  |
| Si | -4.22639301577663  | 7.71301695933581  | 1.40707787817056  |
| Si | -11.61236279818355 | -1.42060958711041 | 0.98733241190049  |
| Si | -4.07294838849130  | -7.49187933104709 | 1.03167058316753  |
| Si | -1.89558625981742  | -6.66612471393472 | 1.43807873117694  |
| Si | -1.12500779150201  | -4.67266143197832 | 2.30113392530982  |
| Si | 1.22866761045712   | -4.73133766210675 | 2.32839765955799  |
| Si | 1.71063696358216   | -2.82115092798516 | 1.10604948246556  |
| Si | 3.86277123222979   | -2.03512634046945 | 0.88682387348354  |
| C  | 0.61781994426699   | -4.63581838401367 | 4.13671140744140  |
| O  | -0.67616091966262  | -4.66367987839483 | 4.15895608300612  |
| H  | -10.63295167633422 | 4.09254360114498  | -2.02826335676907 |
| H  | -10.29659985628430 | -4.19403205169813 | -2.35243668500128 |
| H  | -12.93881557519807 | 1.48545536955327  | -1.99364008068564 |
| H  | -6.94002463119707  | -6.54409439971480 | -2.26896714136090 |
| H  | -7.17681641978143  | 6.83059533179216  | -1.81718091684116 |
| H  | -0.01661029956484  | -8.54173847391385 | -2.34594159827634 |
| H  | 3.74631028347721   | -8.33684082393915 | -2.32599325397391 |
| H  | 6.91595647995959   | -6.49671738991159 | -2.30958802244321 |
| H  | 10.25310356744973  | -4.16137439598869 | -2.32879595087908 |
| H  | 12.81576188256504  | -1.78623264817107 | -2.04222202747144 |
| H  | 12.96934500376150  | 1.47264725349918  | -1.86128464066090 |
| H  | 10.71887516377609  | 4.11783462927813  | -1.89666035678816 |
| H  | 7.16607264270126   | 7.02220942717986  | -1.74641123926663 |
| H  | 4.48981275365187   | 9.16608836493027  | -1.68641322310442 |
| H  | -0.05570977422387  | 9.90340094586611  | -1.71633477446252 |
| H  | -4.57380002270398  | 9.07466936500919  | -1.74122883038140 |
| H  | -12.82876079547527 | -1.78061742681484 | -2.13117347041151 |
| H  | -3.73203133824632  | -8.32899566789374 | -2.30734710936002 |
| H  | -10.62325730885346 | 3.92817220219613  | 2.04396055159419  |
| H  | -10.29379888209210 | -4.34357722283118 | 1.74146354638671  |
| H  | -12.94478140004559 | 1.34868081864612  | 1.79172661814952  |
| H  | -7.06741614894858  | -6.46645751086760 | 1.77048879188592  |
| H  | -7.21485326713375  | 6.65406328036281  | 2.07242723117758  |
| H  | -0.08474154949556  | -9.46499436928647 | 1.76249979396584  |
| H  | 4.57674388442054   | -8.79493182993222 | 1.66905153042773  |
| H  | 7.08383728270993   | -6.37987693674650 | 1.69589716685181  |
| H  | 10.15818407083634  | -4.34988059855742 | 1.76088136894986  |
| H  | 12.76361972018664  | -1.98401886117324 | 1.76363657929313  |
| H  | 12.91216794632629  | 1.29323040666944  | 1.91813320851787  |
| H  | 10.62131735675357  | 3.89736053034220  | 2.17109633049094  |

|   |                    |                   |                  |
|---|--------------------|-------------------|------------------|
| H | 7.16786670883664   | 6.82048506334712  | 2.13741258423641 |
| H | 4.49076600276059   | 8.97260383048370  | 2.28936714692449 |
| H | -0.07474827094820  | 9.68104207846384  | 2.41038877877195 |
| H | -4.59301518918899  | 8.89099286787646  | 2.25820477563357 |
| H | -12.84736356274604 | -1.92633130053344 | 1.67306581522736 |
| H | -4.42794364888582  | -8.78365690634482 | 1.69967618033340 |
| H | 1.09933912231990   | -4.53219021245047 | 5.12816195158621 |
| H | -1.79755472277473  | -1.94562603181926 | 3.40268363255625 |

• **Hck-CH<sub>2</sub>O**

|    |                   |                   |                   |
|----|-------------------|-------------------|-------------------|
| Si | 27.34228015831011 | 2.22954578418788  | 2.37618164922349  |
| Si | 27.14251507529232 | -2.38306668891113 | 2.70768680134808  |
| Si | 29.61528288584083 | 2.77963609448051  | 2.65873176070442  |
| Si | 29.34588914437753 | -3.12661234393841 | 3.07708151172816  |
| Si | 31.12494638289079 | 0.96372798780757  | 3.00887743775944  |
| Si | 19.50474558796106 | -1.17445763017656 | 1.48579025908747  |
| Si | 21.42598062450868 | 2.64189966839373  | 1.47683038722633  |
| Si | 21.21248932985317 | -2.79183237352889 | 1.83580910895297  |
| Si | 23.69478236360109 | 2.24404860680268  | 1.83770076211404  |
| Si | 23.45571812256662 | -2.16873904838054 | 2.12311144111951  |
| Si | 25.52658317518020 | 3.75548363297615  | 1.97577084043691  |
| Si | 25.15263371735736 | -6.13480370623185 | 2.68964940192258  |
| Si | 24.35204755955354 | 0.01112315918489  | 2.12507101493527  |
| Si | 25.63423665443990 | 6.13946128525124  | 1.80385058447768  |
| Si | 25.18579760497654 | -3.75609952752421 | 2.50793348288751  |
| Si | 26.67740471829200 | -0.06037880630851 | 2.45305927602611  |
| Si | 19.28687061221015 | -8.14987324249288 | 1.91302109285124  |
| Si | 17.49147782375533 | -6.62463688365922 | 1.55857230166486  |
| Si | 15.26197413321887 | -7.39161050472553 | 1.34822528941931  |
| Si | 13.40908494675280 | -5.92120702556790 | 0.97088588383732  |
| Si | 13.52773438160579 | -3.55111563056646 | 0.80876601018635  |
| Si | 11.67619852019587 | -2.07666437432167 | 0.42830458355810  |
| Si | 9.42796951278365  | -2.71395019162351 | 0.14050933910746  |
| Si | 7.87602157056879  | -0.93933042341698 | -0.23396223290021 |
| Si | 7.94298233257345  | 1.45282512527877  | -0.40443410369921 |
| Si | 9.57370908218512  | 3.19233224684552  | -0.28393210605508 |
| Si | 11.80327868632178 | 2.53233049121302  | 0.09461935520255  |
| Si | 12.31590308725695 | 0.21644163277871  | 0.34017541880785  |
| Si | 14.63322074992114 | 0.18212670397013  | 0.72592108689162  |
| Si | 15.45581551496702 | 2.37699635549780  | 0.64925039281956  |
| Si | 13.72549526351673 | 3.96685894429752  | 0.25645317077985  |
| Si | 13.74659535302356 | 6.35209583238339  | 0.07379063315269  |
| Si | 15.59135306058398 | 7.89052086953488  | 0.21882206979316  |

|                      |                   |                   |
|----------------------|-------------------|-------------------|
| Si 17.82365702308779 | 7.17642265015439  | 0.60225135111547  |
| Si 19.75365066605002 | 8.59813841857241  | 0.75892222475428  |
| Si 21.59942259522634 | 7.10927400391207  | 1.14704359961084  |
| Si 20.80156186296816 | 4.88866658871065  | 1.20304319823276  |
| Si 18.48560371961110 | 4.92338955079812  | 0.86332618263174  |
| Si 17.74880182034935 | 2.69120806688597  | 0.95115080286244  |
| Si 19.55472349439971 | 1.17891596605491  | 1.32232508196903  |
| Si 23.87469498656271 | 7.73669542514413  | 1.42125694576104  |
| Si 31.02036667482011 | -1.42761219394689 | 3.17901326070640  |
| Si 23.22713637960723 | -7.55533791005615 | 2.49923184379219  |
| Si 21.10260349720148 | -6.60855401181553 | 2.05710039990442  |
| Si 20.41792341163458 | -4.61236176909435 | 3.04643432763980  |
| Si 18.33684055991595 | -4.58736315023128 | 2.21550130619888  |
| Si 17.60771184682119 | -2.59170299548429 | 1.36582458324208  |
| Si 15.36408546762900 | -2.04759065411379 | 0.96153878939946  |
| Si 27.69807013555936 | 2.04523537784887  | -0.02613592912598 |
| Si 27.49962095800070 | -2.56903269856706 | 0.30185153514122  |
| Si 29.96765862983109 | 2.59785314895276  | 0.27942939195221  |
| Si 29.69891452656437 | -3.31152374843816 | 0.69504529628130  |
| Si 31.47217599488953 | 0.78216466371165  | 0.65434300699503  |
| Si 19.82295308613031 | -1.36997769187606 | -0.89569038858576 |
| Si 21.77250915271366 | 2.44960448135353  | -0.92490900306042 |
| Si 21.58712290779759 | -2.92948794497626 | -0.55628321424926 |
| Si 24.04418641392716 | 2.05832350583495  | -0.55688302391089 |
| Si 23.82536751735852 | -2.34569913872057 | -0.27449588048451 |
| Si 25.87462446608399 | 3.56932896143415  | -0.39796841498396 |
| Si 25.52475772491298 | -6.32290986210588 | 0.31579785874881  |
| Si 24.71623252972569 | -0.16782359383807 | -0.25178627007063 |
| Si 25.98009612518454 | 5.95227728518608  | -0.57217185969347 |
| Si 25.53922221917065 | -3.94162666908428 | 0.13938183774683  |
| Si 27.04362191793847 | -0.24515786817647 | 0.06823266205526  |
| Si 19.61524246730102 | -8.34237778037135 | -0.44248707488673 |
| Si 17.80227660284607 | -6.82996237614342 | -0.83673789813808 |
| Si 15.58190688584491 | -7.62987422874181 | -1.01851421379216 |
| Si 13.76289903216146 | -6.10855978652178 | -1.40723900851648 |
| Si 13.88669777133579 | -3.72990387617217 | -1.55991575153260 |
| Si 12.02743973892913 | -2.26752928530466 | -1.97563604480488 |
| Si 9.77520952455221  | -2.89821226990558 | -2.24258365248380 |
| Si 8.22321076375408  | -1.11652314365677 | -2.59017623151637 |
| Si 8.28611582921134  | 1.27672789640765  | -2.75973106329426 |
| Si 9.91561874163053  | 3.01932716270672  | -2.66589180892636 |
| Si 12.14589576042681 | 2.35288796348601  | -2.30947009936337 |
| Si 12.63388231105824 | 0.03446287290343  | -2.05304809034865 |
| Si 14.94856041046173 | 0.00344768394889  | -1.65743985215360 |

|    |                   |                   |                   |
|----|-------------------|-------------------|-------------------|
| Si | 15.79816595496171 | 2.18686768304379  | -1.75076557040401 |
| Si | 14.06988369467603 | 3.78122727925572  | -2.11708306793563 |
| Si | 14.09177535588321 | 6.16458869047044  | -2.30270964354819 |
| Si | 15.93432300278335 | 7.70508138579183  | -2.15804886103319 |
| Si | 18.16794344372804 | 6.98778880925990  | -1.78808600684729 |
| Si | 20.09639832248730 | 8.41073173297713  | -1.61973127225020 |
| Si | 21.94361029406916 | 6.92020481986942  | -1.24315296591420 |
| Si | 21.14477071603103 | 4.69865380728672  | -1.17829004256233 |
| Si | 18.82770728874191 | 4.73461722750324  | -1.51631415706334 |
| Si | 18.09189307646776 | 2.50186495526147  | -1.45232442940350 |
| Si | 19.89398041414807 | 0.98776133685332  | -1.07543610999953 |
| Si | 24.21851958098226 | 7.54787207883600  | -0.95536581858506 |
| Si | 31.36844331947952 | -1.60953958098129 | 0.82361686998136  |
| Si | 23.62135907005628 | -7.77446718745045 | 0.13901329369801  |
| Si | 21.49076957059046 | -6.86526653885658 | -0.31577092805348 |
| Si | 21.00909352273672 | -4.95022793682648 | -1.50528807268616 |
| Si | 18.69329489711045 | -4.89449404078982 | -1.76238983603481 |
| Si | 17.93614158004334 | -2.81831911938168 | -1.03618650328311 |
| Si | 15.71484043789522 | -2.20916748365741 | -1.43511637016537 |
| C  | 20.59023899504342 | -4.98846953531317 | -3.42863705162011 |
| O  | 19.13408062792223 | -4.94067284924623 | -3.42965348485091 |
| H  | 29.95986448851392 | 3.99546354320172  | 3.46207182891906  |
| H  | 29.58076308200173 | -4.24654793884756 | 4.04283730499652  |
| H  | 32.27387966960912 | 1.41660973122582  | 3.86119486631469  |
| H  | 26.14959325326820 | -6.69673813004248 | 3.65910143170094  |
| H  | 26.69823029935884 | 6.76191004060783  | 2.65848941776940  |
| H  | 19.13431849003373 | -9.25610665896357 | 2.90681827634996  |
| H  | 14.91353218277929 | -8.54154963741628 | 2.24201759785092  |
| H  | 12.16464335681581 | -6.46196422945683 | 1.60921400163158  |
| H  | 8.87684270072968  | -3.81684113475227 | 0.99012323878816  |
| H  | 6.53086184437252  | -1.30947269761593 | 0.31789814083560  |
| H  | 6.61916095442415  | 1.96626068959450  | 0.08072727276563  |
| H  | 9.06982218697604  | 4.42602500672786  | 0.39880527109051  |
| H  | 12.50076927988382 | 7.00953802877779  | 0.58916421965692  |
| H  | 15.16185688316749 | 9.17450038279722  | 0.86122473237492  |
| H  | 19.66821944487819 | 9.88722741165623  | 1.51652634968666  |
| H  | 24.14630807924935 | 9.01143376914624  | 2.16105124550177  |
| H  | 32.12842794822048 | -1.85450398064645 | 4.09633792445966  |
| H  | 23.29898724557408 | -8.71533113661647 | 3.44456497894431  |
| H  | 30.55698301940822 | 3.68729535157849  | -0.56203013991936 |
| H  | 30.17505038857884 | -4.55922480986109 | 0.01778265334929  |
| H  | 32.82736438748537 | 1.12686502715651  | 0.11008584566789  |
| H  | 26.75840122354596 | -6.98928650308854 | -0.21768702734599 |
| H  | 27.25550472106125 | 6.46143891925983  | -1.17554298225993 |

|   |                   |                   |                   |
|---|-------------------|-------------------|-------------------|
| H | 19.70926173753807 | -9.61406234277293 | -1.22483226099071 |
| H | 15.38629574741508 | -8.93202511483227 | -1.73106322396093 |
| H | 12.72340085733053 | -6.73804037537905 | -2.28597971582982 |
| H | 9.45380200167552  | -4.12567808104459 | -3.03750664330647 |
| H | 7.08473444323283  | -1.59146984603629 | -3.44426227118937 |
| H | 7.16340539491062  | 1.67960299798200  | -3.67003200966916 |
| H | 9.64595340422022  | 4.13255579260151  | -3.63024795707666 |
| H | 13.05532091476069 | 6.70458833755370  | -3.24296142606356 |
| H | 15.72745051182764 | 8.86550656324579  | -3.08344751590400 |
| H | 20.24960422577205 | 9.56547808780489  | -2.56103198993809 |
| H | 24.71871836782725 | 8.69789785494061  | -1.77596735551857 |
| H | 32.68351875518541 | -2.14487340182987 | 0.33820683110382  |
| H | 23.95581303651338 | -9.08054271855480 | -0.51297009968810 |
| H | 20.93423982491711 | -5.90998151836035 | -3.93483489578248 |
| H | 20.99220759346786 | -4.11551785982168 | -3.97604450494062 |

• **Hck-H-CH<sub>2</sub>OH**

|    |                   |                   |                   |
|----|-------------------|-------------------|-------------------|
| Si | 27.31433193108118 | 2.24512579026790  | 2.39103955513298  |
| Si | 27.05063064427516 | -2.37033480748014 | 2.63880506349166  |
| Si | 29.58666856710128 | 2.76113054383668  | 2.73335817171314  |
| Si | 29.22867927287008 | -3.16146670678350 | 3.04625092044027  |
| Si | 31.05678640916322 | 0.91368796409441  | 3.08731049823598  |
| Si | 19.42078040623026 | -1.25803053103299 | 1.08184509179214  |
| Si | 21.41973944631746 | 2.60284156028659  | 1.37621836725658  |
| Si | 21.15210700654913 | -2.78795279162502 | 1.60464592317005  |
| Si | 23.69394271887813 | 2.27942154675884  | 1.74978756723982  |
| Si | 23.36515962035192 | -2.09768203410938 | 1.91789334793183  |
| Si | 25.51850679568818 | 3.78540948852292  | 1.97789893931605  |
| Si | 25.09053108365260 | -6.05634067987918 | 2.59561008235364  |
| Si | 24.34176694999570 | 0.04593979356093  | 1.97945955950611  |
| Si | 25.63820418361511 | 6.16918865556651  | 1.87438210931083  |
| Si | 25.07082792275561 | -3.68850584618495 | 2.36389547147225  |
| Si | 26.64958497898195 | -0.04192097452469 | 2.40863742658146  |
| Si | 19.24024098682105 | -8.13117689840821 | 2.06648032914202  |
| Si | 17.37337502709611 | -6.67099633140070 | 2.01860573831396  |
| Si | 15.17414008041982 | -7.34505280539903 | 1.43072556698337  |
| Si | 13.45599445973006 | -5.76377749599478 | 0.89910098139293  |
| Si | 13.74088812865378 | -3.45169227902387 | 0.57407022785660  |
| Si | 11.82242737567219 | -2.07352626813255 | 0.31024457697034  |
| Si | 9.59162312743068  | -2.79640620970071 | 0.11906658428060  |
| Si | 7.99096622100130  | -1.04348427949700 | -0.14332433288992 |
| Si | 8.02190274522195  | 1.35259361403894  | -0.25348734747884 |
| Si | 9.62973818723859  | 3.11246830431215  | -0.15596274704956 |

|                      |                   |                   |
|----------------------|-------------------|-------------------|
| Si 11.89226421681403 | 2.49938090090157  | 0.08269429331060  |
| Si 12.46739439833848 | 0.19655150339517  | 0.25512477814744  |
| Si 14.80558214122946 | 0.12711696208157  | 0.53884815085730  |
| Si 15.52914434161777 | 2.35175265122100  | 0.49466923121492  |
| Si 13.79346567792005 | 3.94684152146815  | 0.21797215872766  |
| Si 13.78636481402316 | 6.33544143742367  | 0.11596734024935  |
| Si 15.60708427288944 | 7.89238959921343  | 0.29128738673689  |
| Si 17.83909946029881 | 7.17334343650452  | 0.65095418017058  |
| Si 19.76026154423179 | 8.59417209118500  | 0.87263677048504  |
| Si 21.60822360520881 | 7.10029379242663  | 1.22266367934752  |
| Si 20.82295915622914 | 4.87039356364952  | 1.18828639780517  |
| Si 18.51597660281352 | 4.92002353910568  | 0.82137192984417  |
| Si 17.79684768135035 | 2.68909833853462  | 0.80626446636607  |
| Si 19.55328700111291 | 1.12209637750975  | 1.13029838357822  |
| Si 23.87052237769669 | 7.75948623701840  | 1.52169841130636  |
| Si 30.91678237892518 | -1.47941515322076 | 3.21554777078024  |
| Si 23.19102754059922 | -7.51496374665688 | 2.45545084531036  |
| Si 21.03546653578692 | -6.54451824904220 | 2.23812024905508  |
| Si 20.51266497652879 | -4.45598794465711 | 3.16537434627576  |
| Si 18.33365153039538 | -4.63995972748168 | 2.59711824867857  |
| Si 17.75040457282968 | -2.89380848832558 | 1.22185999791298  |
| Si 15.66254177199147 | -2.09017133978200 | 0.60375788838997  |
| Si 27.71602801686602 | 2.10340949672755  | -0.00649757748105 |
| Si 27.45948911337794 | -2.51980444222777 | 0.23940908999236  |
| Si 29.98801550219412 | 2.61210995250887  | 0.35994169935104  |
| Si 29.63665981903717 | -3.30690895520378 | 0.66929750622596  |
| Si 31.45550302239160 | 0.76591952058815  | 0.73846451517719  |
| Si 19.76089330578275 | -1.26383128567976 | -1.30470871607892 |
| Si 21.81554290101411 | 2.52470261140059  | -1.02634312682554 |
| Si 21.55291077333476 | -2.76758640493413 | -0.83184508083853 |
| Si 24.08638335997786 | 2.15559774643136  | -0.63988264988915 |
| Si 23.80296104607563 | -2.25776876297145 | -0.46634809171509 |
| Si 25.91844172629868 | 3.65744109906466  | -0.39198483833387 |
| Si 25.46341132705032 | -6.25183302136240 | 0.22036295739429  |
| Si 24.72380033944150 | -0.08720926098430 | -0.39753793788339 |
| Si 26.00842753946165 | 6.04633926309341  | -0.50172050361388 |
| Si 25.49309826228497 | -3.87696881931920 | 0.00865994149739  |
| Si 27.03251506749025 | -0.18594456969416 | 0.02508335564586  |
| Si 19.49425546626204 | -8.03632753000805 | -0.30840518499018 |
| Si 17.73617397518566 | -6.43871381752267 | -0.38964674520349 |
| Si 15.66489923251560 | -7.41031928040836 | -0.92052131521220 |
| Si 13.79168237680536 | -6.03883231547010 | -1.47313379981260 |
| Si 13.97939487197227 | -3.67184489552190 | -1.80181849245376 |
| Si 12.06941793081029 | -2.23403768328451 | -2.10920781019996 |



|    |                   |                   |                   |
|----|-------------------|-------------------|-------------------|
| Si | 9.82639411776906  | -2.92434139827770 | -2.28368585924104 |
| Si | 8.23963493792415  | -1.15485493893866 | -2.51586264007707 |
| Si | 8.27288484416084  | 1.24420920461508  | -2.62418454050520 |
| Si | 9.86287599243044  | 3.02804736648177  | -2.55531244015028 |
| Si | 12.12791790622591 | 2.41193015037459  | -2.33765520890013 |
| Si | 12.61401288517269 | 0.08792303375722  | -2.15762744394783 |
| Si | 14.93764093455440 | 0.04921983018762  | -1.85743623169986 |
| Si | 15.81497926010143 | 2.23117116526826  | -1.90809278033606 |
| Si | 14.06995644421380 | 3.83635516413809  | -2.17346285499129 |
| Si | 14.10382897527307 | 6.22855594087290  | -2.27057772552645 |
| Si | 15.94449139442811 | 7.77337704379157  | -2.09042754467638 |
| Si | 18.18913259728899 | 7.06927514099360  | -1.74582752477630 |
| Si | 20.11330974947326 | 8.49317211346248  | -1.51063400501719 |
| Si | 21.96137580343727 | 6.99540187593094  | -1.17089721141038 |
| Si | 21.16842812576512 | 4.77147150044722  | -1.19732814044867 |
| Si | 18.85282594636699 | 4.80791749687280  | -1.56217461281865 |
| Si | 18.11672134642653 | 2.57161006687786  | -1.60082034025601 |
| Si | 19.94773871464561 | 1.07747578326168  | -1.26012977280830 |
| Si | 24.22962636999978 | 7.63316436197484  | -0.85618628439152 |
| Si | 31.32155000710351 | -1.62702485467210 | 0.86667816773748  |
| Si | 23.48365011063229 | -7.58359233895394 | 0.06820124702870  |
| Si | 21.35529001018690 | -6.59424623418744 | -0.12125708768783 |
| Si | 20.64359719884419 | -4.78729825814551 | -1.35799981177294 |
| Si | 18.42420469659862 | -4.23621736320663 | -0.69341508258577 |
| Si | 18.06002418444763 | -2.59076793284311 | -2.32455486564649 |
| Si | 15.83175986515324 | -2.13133999103354 | -1.79979933619188 |
| C  | 20.34954395959162 | -5.40728544272248 | -3.16051440174474 |
| O  | 19.31500497375961 | -6.40052825153514 | -3.04643271359593 |
| H  | 29.93009855356425 | 3.95816605398249  | 3.56489436025658  |
| H  | 29.43226197987154 | -4.29923681072992 | 3.99829292037480  |
| H  | 32.19395398049114 | 1.33344113382748  | 3.97194125773304  |
| H  | 26.11284780282873 | -6.55141629250468 | 3.57468411802822  |
| H  | 26.69391064807181 | 6.76119509967127  | 2.76003158935745  |
| H  | 19.24198171258016 | -9.33731180021528 | 2.95102144203799  |
| H  | 14.59597268219104 | -8.51007091193381 | 2.17540585931840  |
| H  | 12.15452489291151 | -6.10866818103178 | 1.55814228745389  |
| H  | 9.11613261075508  | -3.92670227018552 | 0.97856445814438  |
| H  | 6.67809203697823  | -1.45215781404384 | 0.45698537158074  |
| H  | 6.71163586541032  | 1.83667997125857  | 0.29477846627573  |
| H  | 9.14929009860253  | 4.31560844621575  | 0.59493501286586  |
| H  | 12.53275603002686 | 6.94602474286596  | 0.66869511916318  |
| H  | 15.17037623607131 | 9.15430168432884  | 0.97129092899361  |
| H  | 19.65928071949309 | 9.85572973352912  | 1.67357693426771  |
| H  | 24.11922727592119 | 9.01862592812505  | 2.29532587836492  |

|   |                   |                   |                   |
|---|-------------------|-------------------|-------------------|
| H | 31.99842909450448 | -1.93346538318339 | 4.15134187308825  |
| H | 23.38665118553127 | -8.72094146536574 | 3.32319088627809  |
| H | 30.61620785982071 | 3.70403445336530  | -0.44973013397323 |
| H | 30.11233388418570 | -4.54734888172319 | -0.02186224434158 |
| H | 32.82774683223469 | 1.10216298776512  | 0.23260930035929  |
| H | 26.65419087978266 | -6.98086155654665 | -0.32839017003628 |
| H | 27.27985427520735 | 6.59029067384482  | -1.08311835642638 |
| H | 19.42125814223013 | -9.18615777503251 | -1.26313236404651 |
| H | 15.79022741456738 | -8.68967930854312 | -1.68941755432144 |
| H | 12.80968154580476 | -6.77615067854108 | -2.33472411367817 |
| H | 9.48409934529352  | -4.13921466773111 | -3.08952417542901 |
| H | 7.06891044833855  | -1.61378333753200 | -3.33453026343289 |
| H | 7.10370848779248  | 1.64884612325426  | -3.47370178318775 |
| H | 9.50120815693205  | 4.16174076157029  | -3.46426152322599 |
| H | 13.06243531202620 | 6.81782391526803  | -3.17571284094646 |
| H | 15.72316478952362 | 8.95636657824268  | -2.98365432471718 |
| H | 20.27978327841461 | 9.68028903515907  | -2.40854675412890 |
| H | 24.72544087227794 | 8.80683470733271  | -1.64566030678506 |
| H | 32.64345912242003 | -2.16751903072353 | 0.40581154704835  |
| H | 23.66988288703699 | -8.85644559019034 | -0.69944065936867 |
| H | 21.28978368232466 | -5.83987679963606 | -3.56237508149847 |
| H | 20.04548010564357 | -4.57067345634141 | -3.82130555096744 |
| H | 18.34565770565992 | -2.95254953189306 | -3.74757759220525 |
| H | 19.13371736344242 | -6.77304499053469 | -3.92865054360483 |

• **Hck-CH<sub>3</sub>OH**

|    |                   |                   |                   |
|----|-------------------|-------------------|-------------------|
| C  | 19.77868394220170 | -5.95228048908543 | -3.45639921669099 |
| H  | 19.79473843791153 | -4.85062479906351 | -3.42219463546038 |
| Si | 27.30158792235108 | 2.19756236042464  | 2.33268121612517  |
| Si | 27.05763978946286 | -2.38155239839583 | 2.45223491035437  |
| Si | 29.57507171964156 | 2.65543787675932  | 2.75398425373692  |
| Si | 29.20288992325385 | -3.25334534355059 | 2.86838524438211  |
| Si | 31.04110648404659 | 0.79665331483048  | 3.05144425852669  |
| Si | 19.55069487846764 | -1.25191732116398 | 1.06662470369625  |
| Si | 21.39652496933588 | 2.53312165542140  | 1.34438885169180  |
| Si | 21.05279138466594 | -2.90620327098039 | 1.84607232972332  |
| Si | 23.66345740158186 | 2.21302248736502  | 1.72926610787210  |
| Si | 23.23681300753966 | -2.09965136970103 | 1.75167968861952  |
| Si | 25.49063822224829 | 3.71928698949330  | 1.98515401446607  |
| Si | 25.09478546954753 | -5.90956931680096 | 2.51018563843822  |
| Si | 24.26752429861954 | -0.01598389936841 | 2.05806896037159  |
| Si | 25.61716701358867 | 6.10553016796616  | 1.93340194054362  |
| Si | 25.02321361650290 | -3.57708818024689 | 2.16534663774690  |

|    |                   |                   |                   |
|----|-------------------|-------------------|-------------------|
| Si | 26.60372967582314 | -0.07453799891049 | 2.29777047095881  |
| Si | 19.26402573408187 | -7.95365443751975 | 2.14100726505427  |
| Si | 17.42762808945360 | -6.46465320717582 | 2.01172655909717  |
| Si | 15.28672028459005 | -7.22554104263521 | 1.35261221498412  |
| Si | 13.53271097223281 | -5.68250210966686 | 0.83438265564174  |
| Si | 13.81287493453391 | -3.35723096941839 | 0.59827613551940  |
| Si | 11.85443591060747 | -2.04743560976469 | 0.27901848996364  |
| Si | 9.65938423118104  | -2.85103188375321 | 0.03117472577855  |
| Si | 8.01719486526406  | -1.14452442987581 | -0.26683790144636 |
| Si | 7.98480668688380  | 1.25291793501624  | -0.37096790451091 |
| Si | 9.52551674277576  | 3.07243449032862  | -0.23848288892401 |
| Si | 11.80078404427918 | 2.53758689808112  | 0.06886683097684  |
| Si | 12.40843907949827 | 0.24278312641579  | 0.23778337457075  |
| Si | 14.73784193418978 | 0.23036858434602  | 0.54252820402686  |
| Si | 15.44275352979551 | 2.45219716889086  | 0.52796350417274  |
| Si | 13.68059489956802 | 4.01713075801421  | 0.24605622387069  |
| Si | 13.72338266467490 | 6.40287610037058  | 0.16553710408333  |
| Si | 15.58613902733151 | 7.90492950292311  | 0.38906640320416  |
| Si | 17.81191561102380 | 7.14656860570741  | 0.74521975028716  |
| Si | 19.75582990944130 | 8.53554506329397  | 1.00600885432470  |
| Si | 21.60083132863824 | 7.02837202258268  | 1.30710418478767  |
| Si | 20.80544268543082 | 4.80526791529250  | 1.20886045550256  |
| Si | 18.50049473927441 | 4.88878979025831  | 0.85623359694385  |
| Si | 17.73532084453673 | 2.67132716451022  | 0.81172374595881  |
| Si | 19.50893365455652 | 1.10280238721807  | 1.13462008816699  |
| Si | 23.85404249689474 | 7.70462278657812  | 1.62189867294883  |
| Si | 30.90794020497248 | -1.59763161565737 | 3.09788984249079  |
| Si | 23.22324978981110 | -7.40766219456197 | 2.51566158117153  |
| Si | 21.06062841490343 | -6.42493239092749 | 2.50324002166999  |
| Si | 20.45119780946736 | -4.39109319566390 | 3.57698198285211  |
| Si | 18.32020670158579 | -4.46101185157391 | 2.75403801261134  |
| Si | 17.73691973021138 | -2.70325643261276 | 1.37081616224038  |
| Si | 15.67816425787248 | -1.93104332971570 | 0.69510026887569  |
| Si | 27.75309971492252 | 2.15152213572672  | -0.05259776534495 |
| Si | 27.47894616784004 | -2.50308114419831 | 0.06227330522892  |
| Si | 30.01997031632495 | 2.61988874651632  | 0.38216104676464  |
| Si | 29.63168077404000 | -3.34742071035590 | 0.48919325717550  |
| Si | 31.45060466508586 | 0.73240714664358  | 0.70096076498305  |
| Si | 19.68023599935189 | -1.18331736994270 | -1.39509091731113 |
| Si | 21.79076892627774 | 2.48141764442392  | -1.05045646571555 |
| Si | 21.68297567985742 | -2.40304402556794 | -1.64925438216457 |
| Si | 24.07553814291333 | 2.12355616296338  | -0.64744538871641 |
| Si | 23.77009678226915 | -2.13112111263759 | -0.66889502696593 |
| Si | 25.89708008986014 | 3.64279229465294  | -0.38855513644250 |

|    |                   |                   |                   |
|----|-------------------|-------------------|-------------------|
| Si | 25.45480783675316 | -6.14420457515631 | 0.14028220374291  |
| Si | 24.84209744133528 | -0.07081432560721 | -0.34363806548778 |
| Si | 25.98047385163107 | 6.03419691690444  | -0.44643164377024 |
| Si | 25.45257476334242 | -3.77436385029549 | -0.18558656455302 |
| Si | 27.16210921856691 | -0.15211016113124 | -0.05456904400457 |
| Si | 19.59115199304961 | -7.70097283091202 | -0.20915085467010 |
| Si | 17.84995937305003 | -6.13377684103747 | -0.40034800386522 |
| Si | 15.83301749918730 | -7.18296759614446 | -0.97906425834198 |
| Si | 13.93095033842419 | -5.86874283348537 | -1.53739297556119 |
| Si | 14.16150548633113 | -3.50567920466885 | -1.77896517635557 |
| Si | 12.18276723518985 | -2.18773647528933 | -2.13660498910069 |
| Si | 9.96942061516880  | -2.95868497626643 | -2.36390402816791 |
| Si | 8.32843382896120  | -1.24355195003158 | -2.63223737380362 |
| Si | 8.28790834558797  | 1.15495255067105  | -2.73521077476694 |
| Si | 9.82397703717509  | 2.98158839220485  | -2.62976408664932 |
| Si | 12.10136690457935 | 2.44166240722287  | -2.34096255475366 |
| Si | 12.68525967977617 | 0.13344927901840  | -2.16384421979073 |
| Si | 15.00978506065434 | 0.09751158950443  | -1.84662503881343 |
| Si | 15.74724932101893 | 2.32832795550924  | -1.86716398159909 |
| Si | 13.99594475284496 | 3.91734288735681  | -2.14516456145905 |
| Si | 14.07106514461769 | 6.31170416977398  | -2.21571559374142 |
| Si | 15.93348340558245 | 7.82666044887770  | -1.99332455126311 |
| Si | 18.17028577892097 | 7.09858155655380  | -1.64545969206455 |
| Si | 20.11001476892401 | 8.49265006093669  | -1.38253628268998 |
| Si | 21.95240966877350 | 6.97985002159986  | -1.08685543109154 |
| Si | 21.16578012901567 | 4.75200362516781  | -1.16599967610730 |
| Si | 18.85019919613332 | 4.84354863726858  | -1.52852132779518 |
| Si | 18.04438473111688 | 2.65047231382577  | -1.60122792401152 |
| Si | 19.84479936015800 | 1.14594982488679  | -1.31313804222428 |
| Si | 24.21134180108745 | 7.63551483049154  | -0.76041891313721 |
| Si | 31.31007750405615 | -1.66561137969407 | 0.74585439511389  |
| Si | 23.43223514229540 | -7.38708244879031 | 0.11814699893375  |
| Si | 21.39773935556607 | -6.22977023342724 | 0.12911262273672  |
| Si | 20.82554388496735 | -4.03332322976732 | -0.24895354696945 |
| Si | 18.47025770950687 | -3.89741919230682 | -0.60444428092311 |
| Si | 18.16850533674494 | -2.62944772360463 | -2.58602554955302 |
| Si | 16.06341843478156 | -2.02086829874928 | -1.69832240428097 |
| O  | 18.47286456315554 | -6.35054950804167 | -3.02687141366512 |
| H  | 29.89830499333063 | 3.81431499364425  | 3.64522906869239  |
| H  | 29.35204927760810 | -4.41603388125362 | 3.79954860624556  |
| H  | 32.17303471304312 | 1.19528960362106  | 3.95200560736813  |
| H  | 26.14353938114256 | -6.27495511180379 | 3.51728790474829  |
| H  | 26.67635335318704 | 6.66040297767044  | 2.83859683526286  |
| H  | 19.17404470499856 | -9.25031437683010 | 2.88030174828072  |

|   |                   |                   |                   |
|---|-------------------|-------------------|-------------------|
| H | 14.74840884217340 | -8.43612157218186 | 2.05303094973490  |
| H | 12.23216784597404 | -6.06455755386177 | 1.47508274778240  |
| H | 9.19947808150870  | -4.00034697938414 | 0.87400968331203  |
| H | 6.69911988831135  | -1.58390538403307 | 0.29978827211439  |
| H | 6.64798039556117  | 1.69558136666581  | 0.14794602856540  |
| H | 8.97305023246675  | 4.25979151846863  | 0.48774792712574  |
| H | 12.48124784924010 | 7.04729240315220  | 0.70541246930920  |
| H | 15.17751143842731 | 9.16735540049139  | 1.08562102627751  |
| H | 19.68042965959029 | 9.77616786423010  | 1.84222137890920  |
| H | 24.10247919377634 | 8.94081647666784  | 2.43144938489089  |
| H | 31.98564082912403 | -2.09030734169038 | 4.01789434010512  |
| H | 23.57551386731283 | -8.59894310103177 | 3.35692222696736  |
| H | 30.68893603990155 | 3.73993567717415  | -0.35225351428992 |
| H | 30.11855665064474 | -4.56982672435204 | -0.22494551597243 |
| H | 32.83233298483295 | 1.06580943103556  | 0.22009532084040  |
| H | 26.61340245626510 | -6.88721696115314 | -0.45481975173185 |
| H | 27.25667362275192 | 6.57335241631937  | -1.02137392638772 |
| H | 19.71218627579650 | -8.78946155141632 | -1.23752223891628 |
| H | 16.04911843903931 | -8.42198501013731 | -1.79743520759224 |
| H | 12.98896994569068 | -6.59652495899842 | -2.44980892236032 |
| H | 9.68586825589709  | -4.17943757375303 | -3.18388689487403 |
| H | 7.19398869198242  | -1.73909538877515 | -3.48026912512683 |
| H | 7.12473593968944  | 1.52920096677456  | -3.60664961689158 |
| H | 9.46316968502505  | 4.10332692680675  | -3.55385045529380 |
| H | 13.04990933822996 | 6.92703954370950  | -3.12653627158157 |
| H | 15.73139598180866 | 9.03330332756721  | -2.85927758456870 |
| H | 20.27764481777547 | 9.70201665636699  | -2.25018009566921 |
| H | 24.71267259513532 | 8.82243898512945  | -1.52587613250513 |
| H | 32.63389370233413 | -2.18456176976281 | 0.26696351379283  |
| H | 23.40034965796890 | -8.60478801628891 | -0.75305579184413 |
| H | 20.57268211648296 | -6.34099379852821 | -2.78632145281383 |
| H | 19.97835726801395 | -6.28026199813169 | -4.49393945437984 |
| H | 18.41775026476223 | -7.32259114801673 | -3.08267536650999 |

- **Hck-H-H-CH<sub>3</sub>OH**

|    |                   |                   |                   |
|----|-------------------|-------------------|-------------------|
| C  | 21.10857391270108 | -6.03702210286885 | -3.60884582137207 |
| O  | 19.97592274620775 | -5.47080849051728 | -2.95363541049788 |
| H  | 20.84624322956619 | -6.45476832706125 | -4.60048038301348 |
| H  | 21.93187746196680 | -5.30592451611442 | -3.72736293741530 |
| H  | 21.46789293707706 | -6.85806962212039 | -2.96646904970841 |
| H  | 19.64773334899188 | -4.71466272289422 | -3.47660692833881 |
| Si | 27.31680249070262 | 2.31896779184303  | 2.44208418400067  |
| Si | 27.09659126607885 | -2.26644821362236 | 2.50839973673249  |

|                      |                   |                   |
|----------------------|-------------------|-------------------|
| Si 29.58168606468289 | 2.80894663913786  | 2.87194646165574  |
| Si 29.24778811442317 | -3.11547353279340 | 2.93451854481126  |
| Si 31.05262245645814 | 0.95354247060700  | 3.17467277878045  |
| Si 19.64187266304958 | -1.24327775975731 | 0.94153751977756  |
| Si 21.44684107919323 | 2.65874760542900  | 1.36994548386666  |
| Si 21.15491590753891 | -2.88848955941365 | 1.73075243438386  |
| Si 23.70834185764690 | 2.32849708683851  | 1.75188339685317  |
| Si 23.31219127854766 | -2.04639364567670 | 1.69086776750105  |
| Si 25.50623227301264 | 3.84516364256045  | 2.06936719241510  |
| Si 25.19244018857193 | -5.84799496778005 | 2.46696295265345  |
| Si 24.32222159714373 | 0.08446070498922  | 1.93546231269166  |
| Si 25.59585471803129 | 6.23184048706643  | 2.06421845624460  |
| Si 25.10159078427726 | -3.51210365712825 | 2.15167738621291  |
| Si 26.63596217660019 | 0.04208881916244  | 2.35997615252810  |
| Si 19.37679212659770 | -8.00843820766343 | 1.92182866512288  |
| Si 17.51287478242620 | -6.53156199608817 | 1.84571993592075  |
| Si 15.36144095860400 | -7.25429522201247 | 1.15417085492842  |
| Si 13.62146947143941 | -5.68959057539724 | 0.64809358459544  |
| Si 13.86894392050136 | -3.35838397744621 | 0.41326937354703  |
| Si 11.90659244746447 | -2.03716327985894 | 0.15015675864792  |
| Si 9.70068069280449  | -2.81224960645157 | -0.10301080848087 |
| Si 8.07385853741163  | -1.08051375770457 | -0.34378230679448 |
| Si 8.05201672375842  | 1.31905924429961  | -0.38777054436301 |
| Si 9.60447507720912  | 3.12501331885461  | -0.21932148103941 |
| Si 11.87420823668167 | 2.55528656612894  | 0.05584020013493  |
| Si 12.46534630743957 | 0.25484741673072  | 0.16233451473077  |
| Si 14.79846594585231 | 0.22574375422945  | 0.46089233851599  |
| Si 15.53661139468377 | 2.43946774843971  | 0.49802558364755  |
| Si 13.76893832273627 | 4.00849555228458  | 0.26252077866521  |
| Si 13.73936151162157 | 6.39604141779046  | 0.24298094825095  |
| Si 15.56444373698687 | 7.93446061858378  | 0.50119302515998  |
| Si 17.79235795860075 | 7.19078223563526  | 0.84928010235754  |
| Si 19.69546394581038 | 8.62590719393417  | 1.14498722891494  |
| Si 21.56647824226896 | 7.14754154889053  | 1.43186777232746  |
| Si 20.80700952363219 | 4.91517467087770  | 1.28873329015452  |
| Si 18.50089902576219 | 4.93745146699290  | 0.92653032193904  |
| Si 17.82142880217065 | 2.69001125257172  | 0.81441113513035  |
| Si 19.62931701175485 | 1.14529294574798  | 1.05514380589923  |
| Si 23.81961973661762 | 7.82118385396125  | 1.76843617492122  |
| Si 30.93216478633416 | -1.44315244421130 | 3.20320900891567  |
| Si 23.33995340857209 | -7.37331158970634 | 2.42204715061070  |
| Si 21.14519960726210 | -6.46207161707989 | 2.36066336314488  |
| Si 20.49888428812523 | -4.42761091377670 | 3.41193881584839  |
| Si 18.38779458793941 | -4.50326587872453 | 2.59755034296752  |

|    |                   |                   |                   |
|----|-------------------|-------------------|-------------------|
| Si | 17.81613458510817 | -2.70138050776477 | 1.25124589434468  |
| Si | 15.75280805381243 | -1.94603883550694 | 0.53297675079735  |
| Si | 27.78009804210350 | 2.29062116496342  | 0.05414768044045  |
| Si | 27.54753832145377 | -2.35353406831531 | 0.11520057085733  |
| Si | 30.04185662450984 | 2.77801462910222  | 0.50497708995058  |
| Si | 29.70682467713837 | -3.17610709204566 | 0.56107334513893  |
| Si | 31.49246146632219 | 0.90672262422467  | 0.82982527862863  |
| Si | 19.98978286042504 | -1.08821475168242 | -1.46623691569161 |
| Si | 21.86775250491629 | 2.67566263771082  | -1.02276597266821 |
| Si | 21.85504246265279 | -2.48576409868917 | -1.87278521232328 |
| Si | 24.14039550397734 | 2.28847458024391  | -0.62853234988258 |
| Si | 23.82715533511064 | -2.06343434687948 | -0.67518728814752 |
| Si | 25.94318536047417 | 3.81279662375671  | -0.30127526637052 |
| Si | 25.58671133150951 | -6.04606981904061 | 0.09837136563365  |
| Si | 24.84034876346818 | 0.05597875536200  | -0.41264401476714 |
| Si | 25.98307143096968 | 6.20850232922559  | -0.31362290043372 |
| Si | 25.55835745654556 | -3.67007944332446 | -0.19747696714577 |
| Si | 27.15019615494458 | -0.00969386666469 | -0.00159056553089 |
| Si | 19.73229930133045 | -7.70828697997904 | -0.42337536221047 |
| Si | 17.94852492811125 | -6.18002877700188 | -0.51883957786786 |
| Si | 15.92440438234311 | -7.17994909087113 | -1.17802828607910 |
| Si | 14.01361435191560 | -5.86553955823381 | -1.72331312868331 |
| Si | 14.15688053401205 | -3.49317626546121 | -1.96444145028448 |
| Si | 12.20620278989804 | -2.11487986715851 | -2.26543087342277 |
| Si | 9.98596075863718  | -2.86053053367696 | -2.50408402185752 |
| Si | 8.36231083397631  | -1.12085208688721 | -2.71353952078354 |
| Si | 8.33875280369598  | 1.27992093276156  | -2.75599612225200 |
| Si | 9.88465880766533  | 3.09673851707043  | -2.61472132260776 |
| Si | 12.15855201798558 | 2.52930362736821  | -2.36014907398062 |
| Si | 12.71160960415175 | 0.21211834340120  | -2.24188286767752 |
| Si | 15.03475875994488 | 0.19875103075499  | -1.92944694722146 |
| Si | 15.84372067796134 | 2.40323926661260  | -1.90229895828218 |
| Si | 14.06962590197275 | 3.98084294287154  | -2.12988451343942 |
| Si | 14.08391527645673 | 6.37598352153383  | -2.14188354418290 |
| Si | 15.92003606742985 | 7.91432677307918  | -1.88071827343187 |
| Si | 18.16149089409747 | 7.20052046892964  | -1.54542384397001 |
| Si | 20.06285682778246 | 8.63820311571665  | -1.23905079493177 |
| Si | 21.93199867036087 | 7.15292761314304  | -0.96288585944239 |
| Si | 21.17915325852654 | 4.91946335909952  | -1.09228864320715 |
| Si | 18.86296872279013 | 4.94711425963091  | -1.45601441523946 |
| Si | 18.14029198861052 | 2.71808619462696  | -1.59530431100346 |
| Si | 19.99106740503888 | 1.25111761347575  | -1.33657333596089 |
| Si | 24.19287905497153 | 7.79617055928168  | -0.61041929705197 |
| Si | 31.37426407572082 | -1.49193569228383 | 0.85750794991732  |

|    |                   |                   |                   |
|----|-------------------|-------------------|-------------------|
| Si | 23.58324518079136 | -7.32594801528243 | 0.02630695862032  |
| Si | 21.51226120573138 | -6.22888661483331 | 0.00537883623625  |
| Si | 20.96926603257537 | -4.02454478205402 | -0.36101187841228 |
| Si | 18.61925209738513 | -3.96802010307116 | -0.62747674839034 |
| Si | 18.25056961082312 | -2.42668984168582 | -2.35345021377560 |
| Si | 16.00606670877013 | -1.95403653503873 | -1.87184060176539 |
| H  | 29.89514414654672 | 3.96659526993410  | 3.76865175933956  |
| H  | 29.41027254108601 | -4.28790332864175 | 3.85177241765624  |
| H  | 32.17314906085063 | 1.34700140304827  | 4.09212004000230  |
| H  | 26.23174133159117 | -6.24524282737617 | 3.47206721446342  |
| H  | 26.64150553573589 | 6.79287659194986  | 2.98149536913205  |
| H  | 19.27841888139406 | -9.30911941791629 | 2.65308981869849  |
| H  | 14.78569503239731 | -8.46544889483303 | 1.82332922650133  |
| H  | 12.31439246520714 | -6.07272880733036 | 1.27390752030970  |
| H  | 9.23231508877488  | -3.97825957880587 | 0.71142327207000  |
| H  | 6.75770505056565  | -1.52783529611922 | 0.22081643775248  |
| H  | 6.72000777410287  | 1.75137394578597  | 0.15136542503072  |
| H  | 9.06887399603358  | 4.29635586770018  | 0.54425889648070  |
| H  | 12.47986773186935 | 6.98297203054818  | 0.80737966829110  |
| H  | 15.12815101557246 | 9.16919419568072  | 1.22962729901788  |
| H  | 19.57537679958884 | 9.84710773329120  | 2.00391703048356  |
| H  | 24.05173609630293 | 9.04899429091880  | 2.59559497688940  |
| H  | 31.99932214471296 | -1.93260643705209 | 4.13761025732297  |
| H  | 23.68754236078390 | -8.57205617848405 | 3.25446952866074  |
| H  | 30.70169559163542 | 3.90491729271972  | -0.22792882414956 |
| H  | 30.20795787283729 | -4.38882900283529 | -0.16063613860587 |
| H  | 32.87592680990488 | 1.26161623848622  | 0.36877495854671  |
| H  | 22.00528024662650 | -2.90227379641617 | -3.30248440898962 |
| H  | 26.75598674734995 | -6.79388441665892 | -0.47086600755355 |
| H  | 27.24853637811955 | 6.80055878699238  | -0.86056603851469 |
| H  | 19.85688657907454 | -8.76448911826571 | -1.47721422881419 |
| H  | 16.13818482463738 | -8.40409994106963 | -2.01349317815474 |
| H  | 13.08453267508735 | -6.60169683755543 | -2.64202480407590 |
| H  | 9.68882161811426  | -4.05657197206293 | -3.35477787820395 |
| H  | 7.21577486310552  | -1.58657285283477 | -3.56200529674775 |
| H  | 7.17197188914824  | 1.68102405756245  | -3.61036094497501 |
| H  | 9.52015749628196  | 4.24233146567436  | -3.50738349334556 |
| H  | 13.05275566753404 | 6.99061467388123  | -3.04168979838652 |
| H  | 15.70473356846283 | 9.13258735177715  | -2.72675381036122 |
| H  | 20.20611925741722 | 9.86667586933959  | -2.08376797653954 |
| H  | 24.68446744407562 | 9.00515690089840  | -1.34748483949486 |
| H  | 32.70945909466060 | -1.99845352379159 | 0.39644321600960  |
| H  | 23.58705069454365 | -8.54386416124859 | -0.84659097709610 |
| H  | 18.53316348981332 | -2.95021335712319 | -3.73441733392335 |



- **Hck-H-CH<sub>3</sub>-H<sub>2</sub>O**

|    |                   |                   |                   |
|----|-------------------|-------------------|-------------------|
| C  | 20.67392159381997 | -5.43910981176538 | -3.15873191381875 |
| H  | 20.43620612293049 | -4.79851991301972 | -4.03139717499216 |
| H  | 21.62708260857807 | -5.94486905857694 | -3.39910507383335 |
| H  | 19.88721158818687 | -6.21176630453183 | -3.06974274683757 |
| Si | 27.29017895438918 | 2.29836972957317  | 2.49185353462341  |
| Si | 27.10272212058010 | -2.29047488080065 | 2.61880032576812  |
| Si | 29.55467585926440 | 2.80830656568968  | 2.89048789010043  |
| Si | 29.25532950980099 | -3.13775072198504 | 3.03919637364188  |
| Si | 31.02605719655824 | 0.95482546258079  | 3.21615719549046  |
| Si | 19.73428926856469 | -1.18409870560932 | 1.14365838710880  |
| Si | 21.41125110067433 | 2.64818974211205  | 1.41386158096214  |
| Si | 21.14069073630285 | -2.08359069640089 | 2.79745322034388  |
| Si | 23.66571302918838 | 2.20649921576092  | 1.78355848719001  |
| Si | 23.23600863240672 | -2.10261258817484 | 1.82029430433916  |
| Si | 25.43893239135967 | 3.76499843151602  | 2.08554226714821  |
| Si | 25.25569934610659 | -5.84349679849283 | 2.54548666057284  |
| Si | 24.39966299795391 | -0.02296133829057 | 1.84252939145674  |
| Si | 25.54948553450135 | 6.15270184966067  | 2.08352722341801  |
| Si | 25.08476507061501 | -3.51063521752836 | 2.26887439770648  |
| Si | 26.67892132887070 | 0.01323347142552  | 2.42314324679444  |
| Si | 19.36927447531465 | -7.76889888513383 | 1.99854619542920  |
| Si | 17.56432381112828 | -6.23681644321725 | 1.79139958540759  |
| Si | 15.45563127779393 | -7.18667914703711 | 1.23710294011752  |
| Si | 13.75218471521961 | -5.59802413300472 | 0.68898395603937  |
| Si | 14.10022701943329 | -3.29625142456001 | 0.34484541625415  |
| Si | 12.08213143323123 | -2.05587364597508 | 0.14597075347706  |
| Si | 9.89739713280303  | -2.90851415685631 | -0.03099554982387 |
| Si | 8.20458046629433  | -1.23172983236227 | -0.21980676670891 |
| Si | 8.10188032373237  | 1.16492940858023  | -0.26666415697661 |
| Si | 9.60549348933813  | 3.01177573223853  | -0.14209734019011 |
| Si | 11.90132297721200 | 2.51912334415535  | 0.04936819674893  |
| Si | 12.58541035648318 | 0.24313810173957  | 0.14726083984969  |
| Si | 14.92933527529795 | 0.25483628446337  | 0.39600110963970  |
| Si | 15.53459788626739 | 2.51115909425838  | 0.41447193606969  |
| Si | 13.73775060993487 | 4.04039839676346  | 0.21388832359418  |
| Si | 13.73375797734718 | 6.42901644867690  | 0.21323593787201  |
| Si | 15.56683361634041 | 7.96041916244856  | 0.46620533185397  |
| Si | 17.80329754932665 | 7.24150938849170  | 0.81532522449433  |
| Si | 19.70880260731366 | 8.66953612238351  | 1.12271484101242  |
| Si | 21.56791287201274 | 7.18026827252892  | 1.43594440494070  |
| Si | 20.83520002919374 | 4.93438603308541  | 1.31344290340425  |
| Si | 18.53377046940346 | 5.00193249280753  | 0.91891438777471  |

|                      |                   |                   |
|----------------------|-------------------|-------------------|
| Si 17.79309388690324 | 2.79019386415420  | 0.79385521910490  |
| Si 19.53675061034826 | 1.20531391299756  | 1.06789172219487  |
| Si 23.83135642277834 | 7.80574943587418  | 1.77999611579994  |
| Si 30.92372064920094 | -1.44388202272220 | 3.27879363075355  |
| Si 23.32682702219025 | -7.24168142547127 | 2.45460573390438  |
| Si 21.17564187542472 | -6.24618886583746 | 2.33602651907796  |
| Si 20.19604208163434 | -4.16921937748422 | 2.71681401083407  |
| Si 17.89003827872544 | -4.23823085878643 | 3.04541956649043  |
| Si 18.00203369986932 | -2.80249723783717 | 1.16646985844624  |
| Si 15.99159700656775 | -1.87633396661833 | 0.37017952650301  |
| Si 27.73242845116895 | 2.23111229418020  | 0.09976954940343  |
| Si 27.54149195539616 | -2.39313233950381 | 0.22734642543651  |
| Si 29.99790399158059 | 2.73086915849736  | 0.52112685340374  |
| Si 29.70257447040202 | -3.21696288574701 | 0.66349027204858  |
| Si 31.46308838141254 | 0.87614475071501  | 0.87191220846300  |
| Si 20.11614842240302 | -1.01481870413415 | -1.24102890126953 |
| Si 21.85786402426665 | 2.69153657027750  | -0.97542120311315 |
| Si 21.88962591549482 | -2.42360720080163 | -1.92354728960749 |
| Si 24.10093863437124 | 2.19256986655936  | -0.59627270500042 |
| Si 23.76238058952242 | -2.15245311085644 | -0.55527002288850 |
| Si 25.89114258311409 | 3.73358091459393  | -0.28208063276690 |
| Si 25.60132857059542 | -6.04875530433718 | 0.17331093720415  |
| Si 24.81220664814928 | -0.04427554759163 | -0.53236078437140 |
| Si 25.95409533240548 | 6.12967351838417  | -0.29251436768233 |
| Si 25.54554485381933 | -3.68336995649898 | -0.08451439055628 |
| Si 27.08394386014541 | -0.06778547347483 | 0.04496557646043  |
| Si 19.73426420940464 | -7.67585283254809 | -0.34983585190218 |
| Si 17.90105062571295 | -6.18127316390808 | -0.59701826324372 |
| Si 15.89283540887759 | -7.25161504432235 | -1.12738701670123 |
| Si 14.02724727513036 | -5.88308881451347 | -1.69044765960408 |
| Si 14.23854212687943 | -3.51788463697752 | -2.03052440479540 |
| Si 12.28522130147974 | -2.13198228142370 | -2.27685190317711 |
| Si 10.08985087016359 | -2.95578975565575 | -2.44285696697785 |
| Si 8.41183850305639  | -1.26544459675400 | -2.59883872914638 |
| Si 8.32681292967622  | 1.13414748720021  | -2.64162154408747 |
| Si 9.81149801095136  | 3.00726828968097  | -2.54466791283674 |
| Si 12.11529127597063 | 2.52761515207966  | -2.37553297954568 |
| Si 12.69934155465157 | 0.21845014343651  | -2.26786731726732 |
| Si 15.02440746843665 | 0.28321471057563  | -2.00082883906555 |
| Si 15.81799805992895 | 2.49236836237942  | -1.98911330713027 |
| Si 14.00270304065482 | 4.02947199892115  | -2.18271812004161 |
| Si 14.05871294278900 | 6.42528323669339  | -2.17445563398595 |
| Si 15.92254713097085 | 7.93606034495665  | -1.91580587589734 |
| Si 18.17433998348235 | 7.24012408361091  | -1.57513477494182 |

|    |                   |                   |                   |
|----|-------------------|-------------------|-------------------|
| Si | 20.08695082713619 | 8.66854290200522  | -1.26021946321898 |
| Si | 21.94356031575423 | 7.17308738229186  | -0.95753729064046 |
| Si | 21.19180485988695 | 4.93925733005712  | -1.06566833938453 |
| Si | 18.88091735206173 | 4.98702132544620  | -1.47013083404000 |
| Si | 18.11580138423126 | 2.77047317067446  | -1.61837094270740 |
| Si | 19.97480004927836 | 1.31233653951544  | -1.30772882861499 |
| Si | 24.21416379090952 | 7.77091137568205  | -0.59666316044068 |
| Si | 31.36349183171696 | -1.52204245326137 | 0.93453931270145  |
| Si | 23.58133479277176 | -7.30921591913498 | 0.06999330748220  |
| Si | 21.53731558261881 | -6.16027957285228 | -0.05179667159895 |
| Si | 20.86275938713939 | -4.48042794637669 | -1.49184881325918 |
| Si | 18.65592456595995 | -4.01665097705920 | -0.80634400204920 |
| Si | 18.26953800200584 | -2.20536817984676 | -2.17284842341995 |
| Si | 15.99520714763081 | -1.86389714991284 | -2.08525903254102 |
| O  | 19.07745882854665 | -2.56188575766970 | -3.99511173522794 |
| H  | 29.88211327382114 | 3.98094562251763  | 3.76241986950169  |
| H  | 29.43684260447555 | -4.30024860222054 | 3.96575245231360  |
| H  | 32.14893469102686 | 1.36210737586275  | 4.12490531359992  |
| H  | 26.26753537528963 | -6.27812986455070 | 3.56164336868127  |
| H  | 26.60589554810500 | 6.68933945358458  | 3.00374539674238  |
| H  | 19.31209496428505 | -9.00557211261721 | 2.83748613999773  |
| H  | 14.84483413584243 | -8.33358754094915 | 1.98585702251287  |
| H  | 12.43654960971230 | -5.85517100763559 | 1.35970962175599  |
| H  | 9.49026885481277  | -4.08455300449247 | 0.80163180907385  |
| H  | 6.92539982542706  | -1.72445457156983 | 0.39021673648769  |
| H  | 6.77176564488517  | 1.55747777794699  | 0.30604398874271  |
| H  | 9.07459462460541  | 4.16667399130273  | 0.64905827532124  |
| H  | 12.47882959263673 | 7.01691943967975  | 0.78664994825416  |
| H  | 15.12278270875657 | 9.19957495605360  | 1.18268543963189  |
| H  | 19.57718465860210 | 9.89731757992027  | 1.97055060776116  |
| H  | 24.10075591829203 | 9.02228201927133  | 2.61245507246990  |
| H  | 31.99817280889433 | -1.90760521153664 | 4.21792367471982  |
| H  | 23.42284664036392 | -8.45785862881489 | 3.32269421795478  |
| H  | 30.64416086918468 | 3.84518686165213  | -0.24288734969052 |
| H  | 30.19902617253820 | -4.43341691595401 | -0.05575423118224 |
| H  | 32.84305375342159 | 1.23601721240155  | 0.40399365248409  |
| H  | 22.11684644168152 | -2.32762322447067 | -3.41822115091913 |
| H  | 26.76088142771103 | -6.77235998278195 | -0.44326560529872 |
| H  | 27.23920524287767 | 6.69424346119892  | -0.82348380629426 |
| H  | 19.87040821126152 | -8.81232520851638 | -1.31623888122425 |
| H  | 16.09105684133877 | -8.49357148587696 | -1.94052839058253 |
| H  | 13.03895488607343 | -6.59920369406326 | -2.56299696612940 |
| H  | 9.80503322567697  | -4.16407703841500 | -3.28036188286023 |
| H  | 7.24929961030993  | -1.75794597167242 | -3.40951206280956 |

|   |                   |                   |                   |
|---|-------------------|-------------------|-------------------|
| H | 7.12484411337010  | 1.50133776111119  | -3.46200479376419 |
| H | 9.36320126749932  | 4.13917532913774  | -3.41644255506036 |
| H | 13.03229504062618 | 7.07403169578158  | -3.05575214820682 |
| H | 15.70534495057158 | 9.15898407942766  | -2.75504068217273 |
| H | 20.25349567882596 | 9.89310131017681  | -2.10668053687550 |
| H | 24.73935975897792 | 8.96354596403360  | -1.33714905219672 |
| H | 32.69995317939384 | -2.03080262493520 | 0.47965036943658  |
| H | 23.64017840929657 | -8.56895465297687 | -0.73798806610502 |
| H | 19.06949143519862 | -3.52600362453642 | -4.18978421536333 |
| H | 20.03575998948989 | -2.31398673161262 | -3.94298805913681 |

• **Hck-H<sub>2</sub>O-CH<sub>4</sub>**

|    |                   |                   |                  |
|----|-------------------|-------------------|------------------|
| Si | 26.91121030842263 | 2.11094197603312  | 3.42007220310427 |
| Si | 26.77523812906104 | -2.50981359944307 | 3.40481242103833 |
| Si | 29.17224502486099 | 2.66317093864188  | 3.78626737442548 |
| Si | 28.97964719943683 | -3.25616817481550 | 3.76175316312215 |
| Si | 30.70276914537448 | 0.84721669852104  | 4.03023729183373 |
| Si | 19.17701650728748 | -1.28897825616362 | 2.14046707587919 |
| Si | 21.02192003736840 | 2.54521675949523  | 2.43795496106560 |
| Si | 20.87764957411518 | -2.91370371623153 | 2.35413924557085 |
| Si | 23.28419807387751 | 2.11797714035140  | 2.79748193230054 |
| Si | 23.09515056771739 | -2.31690978301137 | 2.76616316864031 |
| Si | 25.08467581566705 | 3.64090370524077  | 3.09233249260801 |
| Si | 24.82361017133840 | -6.27442007192283 | 3.08008068822370 |
| Si | 23.96820599045119 | -0.12683968842035 | 2.88471738176896 |
| Si | 25.14510730689627 | 6.03303647041163  | 3.10260977590668 |
| Si | 24.84923592048441 | -3.89302771580725 | 3.05685495333514 |
| Si | 26.28017690367771 | -0.18474503701230 | 3.31259468319546 |
| Si | 18.96306145596058 | -8.26113997806640 | 2.11896184396964 |
| Si | 17.10184807495617 | -6.79068055704570 | 1.82380918333944 |
| Si | 14.86609715779682 | -7.49928334837525 | 1.44778746344250 |
| Si | 12.99878420646404 | -6.02737210694476 | 1.13228880793589 |
| Si | 13.09674405705391 | -3.65411419411336 | 1.12367995297656 |
| Si | 11.23287243709593 | -2.17580774749590 | 0.82615840326818 |
| Si | 8.98362381460548  | -2.76693601161456 | 0.45515642496654 |
| Si | 7.45618547414603  | -0.95077277513507 | 0.19131506177326 |
| Si | 7.53943683207937  | 1.44747658803227  | 0.19875169227385 |
| Si | 9.17811034943409  | 3.16222776380266  | 0.47325333865581 |
| Si | 11.39011199747630 | 2.44542948591105  | 0.84153246759475 |
| Si | 11.87373672522529 | 0.11426344895683  | 0.91464894236216 |
| Si | 14.18855296734032 | 0.03712656065623  | 1.30317072741188 |
| Si | 15.05615102607403 | 2.21147016963954  | 1.44426710038198 |
| Si | 13.32870551847396 | 3.82709524846505  | 1.14598878162928 |

|    |                   |                   |                   |
|----|-------------------|-------------------|-------------------|
| Si | 13.30690285530284 | 6.21642363965108  | 1.14373394648996  |
| Si | 15.11605087838111 | 7.77157037621018  | 1.44131328276655  |
| Si | 17.34453928485031 | 7.04687557597172  | 1.81448863730302  |
| Si | 19.23646595098819 | 8.49300742381370  | 2.12476657301340  |
| Si | 21.10420650738848 | 7.01448135071194  | 2.44067215334504  |
| Si | 20.33878527035919 | 4.78541637047852  | 2.31480785522496  |
| Si | 18.03038094361901 | 4.78581226542115  | 1.91715479307767  |
| Si | 17.33980813224569 | 2.53375885174884  | 1.82579787563732  |
| Si | 19.19192018405938 | 1.06009536899975  | 2.11273397759741  |
| Si | 23.37061163817884 | 7.63328287655470  | 2.80749363659511  |
| Si | 30.63084129249808 | -1.55097040789987 | 4.02163056470246  |
| Si | 22.88885323838777 | -7.65831147597941 | 2.77232111054526  |
| Si | 20.75016967106847 | -6.70814206980547 | 2.43654583681943  |
| Si | 19.97089874680370 | -4.75961313024486 | 3.42119472726494  |
| Si | 17.99277024774879 | -4.70793178379120 | 2.32641120969142  |
| Si | 17.23239692387993 | -2.59580024658081 | 1.77164804323095  |
| Si | 14.94862507848751 | -2.18698025366308 | 1.43790384976657  |
| Si | 27.31296225154172 | 2.10771834550922  | 1.01895685503748  |
| Si | 27.17693760572596 | -2.51462695325042 | 1.00040694622949  |
| Si | 29.56965483275422 | 2.66173648070363  | 1.40742771548026  |
| Si | 29.37767628182006 | -3.25927364037696 | 1.37993985178652  |
| Si | 31.09450607619765 | 0.84474442256358  | 1.67548681680192  |
| Si | 19.57045705055204 | -1.28202923676818 | -0.27684368827030 |
| Si | 21.42039194588161 | 2.54651524347088  | 0.03394785859296  |
| Si | 21.28160235974202 | -2.89971210430991 | -0.05664086108930 |
| Si | 23.68253829747550 | 2.11975267203607  | 0.40009409588811  |
| Si | 23.50359936063784 | -2.31901312635186 | 0.36190816349670  |
| Si | 25.48265632633373 | 3.63947857614426  | 0.71925578703981  |
| Si | 25.21534206237152 | -6.28862200361015 | 0.70095816474884  |
| Si | 24.36112208167777 | -0.12511434300401 | 0.51137056615278  |
| Si | 25.54049161095773 | 6.03177891666406  | 0.72657080613309  |
| Si | 25.24751801196969 | -3.90400054777229 | 0.68926321499831  |
| Si | 26.67564751154696 | -0.18866464566759 | 0.92438544828158  |
| Si | 19.35532081893190 | -8.26516219849238 | -0.23398555808570 |
| Si | 17.49603000183177 | -6.79360976314434 | -0.55721855299429 |
| Si | 15.25998955568871 | -7.51082834600892 | -0.92254521582865 |
| Si | 13.39029623013252 | -6.04291000258713 | -1.24818213907181 |
| Si | 13.48132677563132 | -3.66690167992165 | -1.25030458296020 |
| Si | 11.62240576517717 | -2.18494843722145 | -1.57606494848742 |
| Si | 9.36873896713334  | -2.77184651520813 | -1.92833657688538 |
| Si | 7.83647658752793  | -0.95560694636648 | -2.16540050317634 |
| Si | 7.92027785318626  | 1.44272763142919  | -2.15724270187560 |
| Si | 9.56412451141568  | 3.15757385995663  | -1.90870096179905 |
| Si | 11.78041367691953 | 2.44123007648250  | -1.56047308596220 |

|    |                   |                   |                   |
|----|-------------------|-------------------|-------------------|
| Si | 12.25835117727010 | 0.10744376681554  | -1.47448094296253 |
| Si | 14.57141893444308 | 0.03532889748358  | -1.07891099730990 |
| Si | 15.44985342844914 | 2.20849178176221  | -0.95678571015914 |
| Si | 13.71636476331630 | 3.82456265312644  | -1.22878460488718 |
| Si | 13.69811637983600 | 6.21504057044727  | -1.23398923030997 |
| Si | 15.50688860493249 | 7.77194479889089  | -0.93599755014092 |
| Si | 17.73873908349384 | 7.05022390767962  | -0.57517511354997 |
| Si | 19.63127412833841 | 8.49397846931230  | -0.25361588323945 |
| Si | 21.49793331000514 | 7.01240607408308  | 0.05285119224276  |
| Si | 20.72839856552193 | 4.78529118935993  | -0.06816449384626 |
| Si | 18.41906220748661 | 4.78800593387516  | -0.46160105376439 |
| Si | 17.73440814523240 | 2.53583809257466  | -0.57621109465778 |
| Si | 19.58749400937208 | 1.06428813142844  | -0.28427486841485 |
| Si | 23.76315954093329 | 7.62949987763383  | 0.43071004595769  |
| Si | 31.02298455565578 | -1.55345414761365 | 1.66618706688862  |
| Si | 23.27266971482387 | -7.66444481058573 | 0.39761476771660  |
| Si | 21.14224871713084 | -6.70640419379067 | 0.04209020319313  |
| Si | 20.72150782482135 | -4.81434273476354 | -1.22881376512893 |
| Si | 18.50549272075756 | -4.72155106165469 | -0.82520195219791 |
| Si | 17.62170603591843 | -2.59538017690633 | -0.61909054583771 |
| Si | 15.33507636212766 | -2.19113078959550 | -0.96865018033471 |
| H  | 29.48532116618970 | 3.82061234753288  | 4.68341202416737  |
| H  | 29.20970304230283 | -4.44117761188911 | 4.64784554854991  |
| H  | 31.82909723493471 | 1.25203979564761  | 4.93539629586971  |
| H  | 25.80854464960063 | -6.90027278593074 | 4.02237894753156  |
| H  | 26.18382264251079 | 6.60659346750155  | 4.02046186157989  |
| H  | 18.82690284450353 | -9.45844179891553 | 3.00505139285494  |
| H  | 14.47795979491450 | -8.74570858428408 | 2.18312991105202  |
| H  | 11.75037436218971 | -6.61731258490871 | 1.71670428989625  |
| H  | 8.40636929152359  | -3.92471077430889 | 1.20899905717409  |
| H  | 6.09943173811597  | -1.34880780667460 | 0.69319959211194  |
| H  | 6.20982745971491  | 1.92997770361928  | 0.69964957027213  |
| H  | 8.67206618758450  | 4.34786163712288  | 1.23494508617037  |
| H  | 12.03734435273049 | 6.80532429174905  | 1.68369863507436  |
| H  | 14.65477639459771 | 8.99434780948329  | 2.17463138807725  |
| H  | 19.10104596264763 | 9.71767050439779  | 2.97622723963525  |
| H  | 23.61769060066706 | 8.85147581756526  | 3.64494414699595  |
| H  | 31.72687001224164 | -2.03221470702955 | 4.92644022281504  |
| H  | 22.95953734612440 | -8.91177011541306 | 3.59035311991479  |
| H  | 30.15818616332810 | 3.81856514297022  | 0.66067013577276  |
| H  | 29.88155130143595 | -4.44737838468586 | 0.62068143784660  |
| H  | 32.45404149514790 | 1.24665031714224  | 1.18371091101426  |
| H  | 26.44084225288490 | -6.94012474755172 | 0.13201682929258  |
| H  | 26.81846266546175 | 6.60976172608100  | 0.19443667112533  |

|   |                   |                   |                   |
|---|-------------------|-------------------|-------------------|
| H | 19.51083242290654 | -9.46453382917788 | -1.11475136783776 |
| H | 15.12843638723061 | -8.76666727140374 | -1.72925424404431 |
| H | 12.39467421526813 | -6.65031361128767 | -2.19042522813395 |
| H | 9.05538359076853  | -3.93228932488004 | -2.82121425003146 |
| H | 6.70656085911676  | -1.35733998151159 | -3.06707353295185 |
| H | 6.81707375168199  | 1.92352355187741  | -3.05343744387294 |
| H | 9.32045427707313  | 4.33864810258325  | -2.79629804906332 |
| H | 12.66884249346803 | 6.80524901291991  | -2.15182960990575 |
| H | 15.30304352733589 | 8.99407791387669  | -1.77888875404668 |
| H | 19.78155003126844 | 9.71883818838296  | -1.10225980350633 |
| H | 24.26637860561882 | 8.84598050453452  | -0.28577342346412 |
| H | 32.35396145028218 | -2.03408127842898 | 1.16705749350734  |
| H | 23.59186030422696 | -8.92523645290803 | -0.34624872450232 |
| O | 18.84975071285740 | -1.59112352082389 | 4.73244551313238  |
| H | 19.78235143426268 | -1.48211646026102 | 5.00266066893647  |
| H | 18.74481322783820 | -2.56797364340826 | 4.71842428249584  |
| C | 18.22872435923765 | -7.35986728308411 | 5.65349917043874  |
| H | 18.22107658113882 | -6.60141991035340 | 6.45222796412439  |
| H | 17.81502279044149 | -8.30863517954704 | 6.03076033447561  |
| H | 19.26409659456972 | -7.51694356440846 | 5.31053892610367  |
| H | 17.61863218694758 | -7.00071551050947 | 4.80786448284085  |

- **Hck-CO**

|    |                   |                   |                  |
|----|-------------------|-------------------|------------------|
| Si | 27.44982717930822 | 2.36745002750328  | 2.49707110210793 |
| Si | 27.35122373132117 | -2.26254874317823 | 2.76720611071727 |
| Si | 29.70198725824681 | 2.99049151314717  | 2.79174739139494 |
| Si | 29.57833075603494 | -2.93522428450063 | 3.13716760472856 |
| Si | 31.25355476294205 | 1.20720663258752  | 3.12773263266175 |
| Si | 19.54105039151732 | -1.02312409817011 | 1.47528301744962 |
| Si | 21.50579791876033 | 2.72620009821964  | 1.55158977546598 |
| Si | 21.39283341568542 | -2.46761878061344 | 1.85335308948528 |
| Si | 23.77470069939559 | 2.29813125850018  | 1.92675693555089 |
| Si | 23.67786188230295 | -2.09939751862198 | 2.18880985329775 |
| Si | 25.58623346568362 | 3.83487746294787  | 2.09617614271716 |
| Si | 25.38263808042233 | -6.06973742639938 | 2.68288657585402 |
| Si | 24.53787802616456 | 0.08730727981768  | 2.15726171910042 |
| Si | 25.65819346219719 | 6.22218776759178  | 1.95835480004259 |
| Si | 25.42294563189250 | -3.68218521302569 | 2.53868001379064 |
| Si | 26.85192465814649 | 0.05900155237350  | 2.54068168394326 |
| Si | 19.37986335211584 | -8.35969299385280 | 1.88749319277070 |
| Si | 17.5269022224899  | -6.87300818790626 | 1.51060926874074 |
| Si | 15.25868089870411 | -7.50762285512655 | 1.18430549808180 |
| Si | 13.48560936854759 | -5.92132460178832 | 0.81175089976349 |

|    |                   |                   |                   |
|----|-------------------|-------------------|-------------------|
| Si | 13.54905643929621 | -3.53368385083380 | 0.67749803636294  |
| Si | 11.68657562461077 | -2.05912188914865 | 0.30016312471988  |
| Si | 9.43803958227293  | -2.68123419142158 | -0.02700610597562 |
| Si | 7.89193645056076  | -0.89984790991212 | -0.39240271527855 |
| Si | 7.94801226488586  | 1.49550950702867  | -0.52950339573567 |
| Si | 9.57024803149915  | 3.23939765316846  | -0.36661115520453 |
| Si | 11.79203851269038 | 2.56591313102237  | 0.03387496583503  |
| Si | 12.30078398807710 | 0.24616183218151  | 0.24944916265424  |
| Si | 14.61180996250347 | 0.21730372904474  | 0.65114210509758  |
| Si | 15.45994630380748 | 2.40817188076688  | 0.63160856800473  |
| Si | 13.72032643140462 | 3.98790678488992  | 0.24026133747491  |
| Si | 13.76088118530997 | 6.37585363247227  | 0.09940617500459  |
| Si | 15.59671622735969 | 7.92285802736601  | 0.28994011391777  |
| Si | 17.83967520467318 | 7.24228502975093  | 0.68556348353840  |
| Si | 19.76355698258182 | 8.67031943132769  | 0.88898025867965  |
| Si | 21.62141489747924 | 7.19326136971596  | 1.27733089538245  |
| Si | 20.84044864501297 | 4.96590627490882  | 1.29590338514154  |
| Si | 18.52349024711523 | 4.99595667075707  | 0.92513537214678  |
| Si | 17.74531502282493 | 2.77890768946706  | 0.96439861633899  |
| Si | 19.59237211223154 | 1.32819987563168  | 1.34498462110994  |
| Si | 23.89381332319877 | 7.81846671999147  | 1.58473005306561  |
| Si | 31.20088240683642 | -1.18838879030840 | 3.26706301627236  |
| Si | 23.54887896517537 | -7.62013940856495 | 2.49297740059540  |
| Si | 21.30532322070459 | -6.93687784672315 | 2.10645699587443  |
| Si | 20.61155116920941 | -4.68342562986516 | 1.93746928461847  |
| Si | 18.30357749276803 | -4.64930102782299 | 1.55106105965360  |
| Si | 17.62161742208471 | -2.41942715303238 | 1.30637966938721  |
| Si | 15.35744696871309 | -1.99798230696534 | 0.88857752575465  |
| Si | 27.82073463316489 | 2.21711307330719  | 0.09296036919794  |
| Si | 27.72200772163535 | -2.40965757622274 | 0.36329163562348  |
| Si | 30.06863025555520 | 2.84355455807620  | 0.41261059165886  |
| Si | 29.94514300313601 | -3.08108645387828 | 0.75801542806678  |
| Si | 31.61660638290939 | 1.06236603790294  | 0.77299813175763  |
| Si | 19.91502425652066 | -1.17272996889269 | -0.92340006755057 |
| Si | 21.87914549337122 | 2.57275282675011  | -0.84972597502694 |
| Si | 21.76374321535409 | -2.61446874198812 | -0.54975324773161 |
| Si | 24.14780754025691 | 2.14744811605503  | -0.47381451719297 |
| Si | 24.04753661133791 | -2.25157375558432 | -0.21464702475501 |
| Si | 25.95348484285481 | 3.68687951761089  | -0.27524934602115 |
| Si | 25.75486892675917 | -6.21626203526858 | 0.30758515475917  |
| Si | 24.90107882261502 | -0.06313487815875 | -0.22148016630294 |
| Si | 26.02646152123013 | 6.07329644152312  | -0.41780761357383 |
| Si | 25.79108783198844 | -3.82919023449594 | 0.16722600310912  |
| Si | 27.21784515095994 | -0.09006509005349 | 0.14735742183757  |



|    |                   |                   |                   |
|----|-------------------|-------------------|-------------------|
| Si | 19.75501615752815 | -8.49487071906211 | -0.49072730000803 |
| Si | 17.90355625069126 | -7.01180887358917 | -0.87758280637604 |
| Si | 15.63455064324400 | -7.64519485606959 | -1.19192618639582 |
| Si | 13.85996115030679 | -6.06219149507551 | -1.56384931030484 |
| Si | 13.92458061665049 | -3.67628408786050 | -1.69297554028983 |
| Si | 12.06354955340290 | -2.20895488551780 | -2.10289956776653 |
| Si | 9.81171349312180  | -2.82927297187526 | -2.40491608815969 |
| Si | 8.26431960746774  | -1.04314981196706 | -2.74563020389094 |
| Si | 8.31929134007366  | 1.35270759135256  | -2.88265016750930 |
| Si | 9.94284191947924  | 3.09795747283043  | -2.74516330937360 |
| Si | 12.16741091741408 | 2.42115127917304  | -2.36957127833501 |
| Si | 12.65854468281622 | 0.09893790038100  | -2.14540170133138 |
| Si | 14.96702383373139 | 0.06867824980149  | -1.72849187047904 |
| Si | 15.83292260023063 | 2.25341495461189  | -1.76956089995665 |
| Si | 14.09441896355171 | 3.83999070282540  | -2.13016579341421 |
| Si | 14.13340779140651 | 6.22690428903420  | -2.27600614221272 |
| Si | 15.96733801868318 | 7.77525947226737  | -2.08709576238240 |
| Si | 18.21036343444209 | 7.09035563481590  | -1.70014568300189 |
| Si | 20.13383190750420 | 8.51784406420137  | -1.48935946695393 |
| Si | 21.99073753366135 | 7.03819493991220  | -1.10904726174550 |
| Si | 21.20622262014153 | 4.81180575157639  | -1.07854918153971 |
| Si | 18.88913178818411 | 4.84249006600833  | -1.44963333183309 |
| Si | 18.11802673310045 | 2.62286406587550  | -1.43791290289377 |
| Si | 19.96602219054620 | 1.17614802190314  | -1.05163693233648 |
| Si | 24.26116583426753 | 7.66731843150277  | -0.79267212397514 |
| Si | 31.56389237717725 | -1.33319374314245 | 0.91287071072835  |
| Si | 23.91695789433505 | -7.75858783592813 | 0.11496398648204  |
| Si | 21.67731587870976 | -7.07181389431848 | -0.28081388453163 |
| Si | 20.98520734274432 | -4.82351074010525 | -0.43193320583896 |
| Si | 18.67244793193881 | -4.79197993297453 | -0.84112865788955 |
| Si | 17.99578614387592 | -2.55790560651195 | -1.09064882014645 |
| Si | 15.73447118746733 | -2.14234433229379 | -1.51252193155374 |
| H  | 30.00778754915228 | 4.20535894655635  | 3.61183725467082  |
| H  | 29.83830110887852 | -4.05774050369718 | 4.09339508743512  |
| H  | 32.38674420610293 | 1.67454117752009  | 3.99313291956737  |
| H  | 26.40973524095477 | -6.62972472139567 | 3.62207516844048  |
| H  | 26.71208574024326 | 6.84283898519882  | 2.82703253360963  |
| H  | 19.21685113962213 | -9.53021885796601 | 2.80796807269908  |
| H  | 14.75164268442767 | -8.67811030330543 | 1.97152650537290  |
| H  | 12.20846247201455 | -6.45763853382826 | 1.38775801807818  |
| H  | 8.87787080010026  | -3.79488640853849 | 0.80233143391211  |
| H  | 6.54042164159214  | -1.28089242299853 | 0.13632141867483  |
| H  | 6.61593220738420  | 1.99536401123748  | -0.05271861248035 |
| H  | 9.05844173758133  | 4.46325569726174  | 0.32771188803689  |

|   |                   |                   |                   |
|---|-------------------|-------------------|-------------------|
| H | 12.50914564958639 | 7.02964175222287  | 0.60561415042500  |
| H | 15.14224879734083 | 9.19601253876622  | 0.93727260388333  |
| H | 19.66004226433527 | 9.94935329751346  | 1.66166987026401  |
| H | 24.16188248961947 | 9.08238285555733  | 2.34439512915852  |
| H | 32.31746080170955 | -1.59982525278531 | 4.18115067774530  |
| H | 23.77150820355133 | -8.79707244500308 | 3.39417467401433  |
| H | 30.62630478237972 | 3.95747752459869  | -0.41805820842511 |
| H | 30.45658331689993 | -4.30557505370031 | 0.06452673664202  |
| H | 32.96571759016477 | 1.44380336784034  | 0.23843986537956  |
| H | 27.00629270945356 | -6.86823121838017 | -0.20157932464083 |
| H | 27.30534036712795 | 6.60118776186684  | -0.99768982993864 |
| H | 19.85914021704128 | -9.76864865017140 | -1.27131116999616 |
| H | 15.37981387269717 | -8.90888985606582 | -1.95627255968921 |
| H | 12.81141556671356 | -6.68404904512929 | -2.43802668127534 |
| H | 9.50607289743710  | -4.04347113268767 | -3.22604859213981 |
| H | 7.13418044320805  | -1.50868592159851 | -3.61596728528669 |
| H | 7.20661795136569  | 1.76528079808302  | -3.80097554205651 |
| H | 9.68728781013617  | 4.22254240071574  | -3.70015674068477 |
| H | 13.10592654689440 | 6.78576464011387  | -3.21541612713404 |
| H | 15.75352435819818 | 8.95142523103518  | -2.99114897965382 |
| H | 20.29433680770694 | 9.68727020528518  | -2.41144715649536 |
| H | 24.76805729100019 | 8.83300074073341  | -1.58681339506679 |
| H | 32.89544071264348 | -1.83061958413100 | 0.43204569242624  |
| H | 24.36281754989790 | -9.03153303333354 | -0.53834317970471 |
| C | 19.70277270742762 | -4.37504501651835 | -3.44922712679801 |
| O | 20.35438597333147 | -3.50327603373475 | -3.80469851371127 |

- **Hck-HCO-H**

|    |                   |                    |                  |
|----|-------------------|--------------------|------------------|
| Si | 23.07199759659025 | -3.30893814561805  | 4.31938917209486 |
| Si | 22.76423022895795 | -7.92774187474243  | 4.61446867876508 |
| Si | 25.36790347135155 | -2.86513636561390  | 4.61284671851807 |
| Si | 24.91047398295813 | -8.81121952937008  | 4.98495526761825 |
| Si | 26.78520739865971 | -4.75945569357508  | 4.94973625075484 |
| Si | 15.28478619710188 | -6.67463469603961  | 4.04920979160746 |
| Si | 17.13269378335585 | -2.97178007115758  | 3.41007762874670 |
| Si | 16.85178192519668 | -8.02964552747368  | 4.92839927596340 |
| Si | 19.40860153047550 | -3.32371201972803  | 3.76107288170647 |
| Si | 18.93113927165671 | -7.59169035073847  | 3.97764169217884 |
| Si | 21.23432683021985 | -1.80876778265328  | 3.91226236545959 |
| Si | 20.85923655059885 | -11.49499628581475 | 4.55193033487416 |
| Si | 20.11447301026320 | -5.54867393310795  | 3.94057984407617 |
| Si | 21.26646916813250 | 0.57786058327614   | 3.73020900587360 |
| Si | 20.71736201463213 | -9.13232849408404  | 4.34397788914095 |

|    |                   |                    |                   |
|----|-------------------|--------------------|-------------------|
| Si | 22.41911325437880 | -5.59806330463818  | 4.38252023618431  |
| Si | 15.02660836357817 | -13.72575000490173 | 3.83907285190786  |
| Si | 13.15769660664591 | -12.29543503278101 | 3.44563530411565  |
| Si | 10.93226138736165 | -13.06239105260399 | 3.17635244518388  |
| Si | 9.15782056048219  | -11.50294413107706 | 2.77713009210172  |
| Si | 9.37586349776298  | -9.14008830567312  | 2.62255590405697  |
| Si | 7.45108782385243  | -7.77163059545879  | 2.21239926868971  |
| Si | 5.23086582558668  | -8.47933289666412  | 1.89201539239352  |
| Si | 3.66968257667236  | -6.71760527522936  | 1.47767647504787  |
| Si | 3.67461952252604  | -4.32300264370602  | 1.28064090798825  |
| Si | 5.22428526237957  | -2.50915120792865  | 1.40693770046205  |
| Si | 7.45715026965042  | -3.11334818794523  | 1.84235031610580  |
| Si | 7.93205063443538  | -5.43795740917208  | 2.10013888777610  |
| Si | 10.24291856898851 | -5.41280565127273  | 2.46349290747586  |
| Si | 11.13726908851973 | -3.25916065605590  | 2.47211186052301  |
| Si | 9.38453906548642  | -1.69782917541669  | 2.03487793574106  |
| Si | 9.36885271669275  | 0.67852477870645   | 1.83092280675711  |
| Si | 11.22320868002453 | 2.19988608062869   | 2.00613011174214  |
| Si | 13.42797152044840 | 1.43697635843372   | 2.43980763056953  |
| Si | 15.32789661976022 | 2.89430648787255   | 2.60068121327950  |
| Si | 17.20711123807625 | 1.45670090499710   | 3.03136004994951  |
| Si | 16.42025223910292 | -0.76306346075291  | 3.11738206096441  |
| Si | 14.11079860756904 | -0.80738262770586  | 2.74975330784698  |
| Si | 13.44020252442858 | -3.06224611083666  | 2.83629373769086  |
| Si | 15.30328938117455 | -4.48659936717523  | 3.32988356923925  |
| Si | 19.46897310153872 | 2.12886341500454   | 3.32500684525052  |
| Si | 26.62395790844878 | -7.15113341021502  | 5.10379960921235  |
| Si | 19.05128831046869 | -13.05507347391738 | 4.39685003193080  |
| Si | 16.87885944856254 | -12.22566567754892 | 3.97430874399878  |
| Si | 16.30296049023436 | -9.95123317980302  | 3.71924757496869  |
| Si | 13.97751638145782 | -10.08710063952661 | 3.41515383509775  |
| Si | 13.45082382772910 | -7.82271160228680  | 3.20509498975587  |
| Si | 11.15816954988556 | -7.54366694294674  | 2.77141970356051  |
| Si | 23.42475830572107 | -3.48908247857550  | 1.91872321974514  |
| Si | 23.12420557529065 | -8.09971881894098  | 2.20842052818802  |
| Si | 25.71892438628779 | -3.04372947906729  | 2.23253214230418  |
| Si | 25.26738989322107 | -8.98543035923105  | 2.60026390199821  |
| Si | 27.13631776990639 | -4.93335018981807  | 2.59648438255636  |
| Si | 15.71264776134410 | -6.84376637296341  | -0.07150698681551 |
| Si | 17.48246839424094 | -3.19369337704608  | 1.01676935942937  |
| Si | 17.53834113477835 | -8.35548680982297  | 0.14547183820242  |
| Si | 19.75939920740340 | -3.50200299380287  | 1.38243237629150  |
| Si | 19.29797689537085 | -7.77558660532324  | 1.56921096412697  |
| Si | 21.58753394007815 | -1.98686634502735  | 1.53139940758137  |

|    |                   |                    |                   |
|----|-------------------|--------------------|-------------------|
| Si | 21.22031401817372 | -11.67829289485841 | 2.18012808552841  |
| Si | 20.44883332665306 | -5.72567385598855  | 1.55904737377764  |
| Si | 21.63989168318070 | 0.39671879268517   | 1.35657063475668  |
| Si | 21.07255915949739 | -9.31209905296948  | 1.98279139304181  |
| Si | 22.75090253240197 | -5.77379834114848  | 1.99523495497371  |
| Si | 15.38090609303759 | -13.92016017938314 | 1.45934253820613  |
| Si | 13.51474410764866 | -12.48714564927560 | 1.06224194929314  |
| Si | 11.29070893959048 | -13.26197680082726 | 0.79846391490966  |
| Si | 9.52708330242561  | -11.69196127520833 | 0.40027353587444  |
| Si | 9.75833006681245  | -9.32898920681956  | 0.25951084725683  |
| Si | 7.84436116610534  | -7.95721110974693  | -0.18171761974788 |
| Si | 5.62276444452041  | -8.66943372939720  | -0.48313325691710 |
| Si | 4.05482228319047  | -6.90944734919708  | -0.86985615065008 |
| Si | 4.06815280283153  | -4.51534010321232  | -1.06393949939169 |
| Si | 5.62666652064954  | -2.70636086945692  | -0.96430260496693 |
| Si | 7.86491550319236  | -3.30876282849201  | -0.55005757311146 |
| Si | 8.35018017085538  | -5.62952777584720  | -0.27310308603515 |
| Si | 10.66030875892393 | -5.61900717811606  | 0.07407764111550  |
| Si | 11.54682225611079 | -3.46617596965951  | 0.09395079576221  |
| Si | 9.79247143029821  | -1.89592820059356  | -0.33215899603097 |
| Si | 9.75687908673986  | 0.47986404623869   | -0.53713247793316 |
| Si | 11.60885823370124 | 1.99923724341732   | -0.36159355214854 |
| Si | 13.80836856045984 | 1.21627029237345   | 0.05506652218787  |
| Si | 15.70454150701366 | 2.67586399996583   | 0.22675853358142  |
| Si | 17.58381468559420 | 1.24044666943590   | 0.65293789435799  |
| Si | 16.78804147297313 | -0.97833546953730  | 0.73919730641714  |
| Si | 14.48182365869284 | -1.02925666218370  | 0.38207079502194  |
| Si | 13.85119341379493 | -3.29768189717390  | 0.45760582300907  |
| Si | 15.68219726508542 | -4.73845755552864  | 0.93661475046706  |
| Si | 19.83842608324624 | 1.93550077115763   | 0.95070769327691  |
| Si | 26.97881462387502 | -7.32544852764829  | 2.74988203067329  |
| Si | 19.43054935921407 | -13.26037713210370 | 2.02827788805324  |
| Si | 17.25667250110363 | -12.44920048860043 | 1.60151368102614  |
| Si | 16.68407922833232 | -10.18969128046701 | 1.32822772900862  |
| Si | 14.35401960315536 | -10.28221585571765 | 1.07391828792299  |
| Si | 13.84987966897341 | -8.01695388580867  | 0.78563173663248  |
| Si | 11.55678826393760 | -7.75353394303887  | 0.39410204717549  |
| H  | 25.77663745731796 | -1.67541030867497  | 5.42508346586964  |
| H  | 25.09966099376170 | -9.94175294668163  | 5.94836440106689  |
| H  | 27.95454789698888 | -4.35671884439300  | 5.80004873375247  |
| H  | 21.89360979651224 | -11.94905241713628 | 5.53895587315609  |
| H  | 22.30168481586981 | 1.23553366180974   | 4.59395463807797  |
| H  | 14.91628828397958 | -14.86904840306577 | 4.80112302364262  |
| H  | 10.47949168577903 | -14.21132513021298 | 4.02525167277978  |

|   |                   |                    |                   |
|---|-------------------|--------------------|-------------------|
| H | 7.87616969349067  | -11.97516793730796 | 3.39534732944664  |
| H | 4.67650788505049  | -9.58077828012024  | 2.74126183510711  |
| H | 2.31934030415478  | -7.10532594442493  | 2.00482882022027  |
| H | 2.31965834781138  | -3.85694992540536  | 1.72654018918833  |
| H | 4.65946301682250  | -1.28725267013997  | 2.06240264355811  |
| H | 8.11645311059971  | 1.32862255119234   | 2.33859988083415  |
| H | 10.79989354449553 | 3.48827984689243   | 2.64391222355748  |
| H | 15.20244326454911 | 4.19266738807306   | 3.33719604667703  |
| H | 19.71425716676949 | 3.41214452069277   | 4.05969855063280  |
| H | 27.72088489776442 | -7.60430415649845  | 6.02177309331530  |
| H | 19.18577670197296 | -14.19161556427952 | 5.36432676529914  |
| H | 26.36443346405967 | -1.97594507495110  | 1.40463204917547  |
| H | 25.69554414433797 | -10.23936218786962 | 1.90285699291085  |
| H | 28.50955476830140 | -4.62796858797160  | 2.07357054311810  |
| H | 22.49508360064955 | -12.23323619750648 | 1.61640837565350  |
| H | 22.90840696885217 | 0.93206169310224   | 0.76160742516315  |
| H | 15.50828157836517 | -15.20243283807413 | 0.69551918817817  |
| H | 11.07826241853950 | -14.54430077201969 | 0.05278022653332  |
| H | 8.47446444417290  | -12.26832372869318 | -0.49846782363189 |
| H | 5.35137144657154  | -9.90574700702364  | -1.28281390616054 |
| H | 2.93206654052948  | -7.40802986530825  | -1.73145889573098 |
| H | 2.94581693549904  | -4.15472570064298  | -1.99256468547699 |
| H | 5.34088878131974  | -1.62045394627361  | -1.95469057811100 |
| H | 8.74299696374100  | 0.99493021357429   | -1.51451953928205 |
| H | 11.45283771129908 | 3.15727856041121   | -1.29959040845698 |
| H | 15.84219215410994 | 3.81955178349241   | -0.73060409493079 |
| H | 20.30718374063157 | 3.09743685866105   | 0.12826526337823  |
| H | 28.28586025225507 | -7.88360729788307  | 2.26867586241665  |
| H | 19.84616726521990 | -14.52993889559499 | 1.34911666096056  |
| C | 15.30236242698895 | -6.41559304327709  | -1.93565117759744 |
| O | 14.85532429593459 | -5.32654974304378  | -2.25421303096348 |
| H | 15.45304059602144 | -7.21475737022242  | -2.71651741935166 |
| H | 18.03965577920881 | -8.68880702681470  | -1.22780001890624 |

- **Hck-H-CO<sub>2</sub>**

|    |                    |                   |                   |
|----|--------------------|-------------------|-------------------|
| Si | -7.81139390804850  | 2.31551623351424  | -1.30287254149573 |
| Si | -7.78093037247713  | -2.28764360255961 | -1.34813940377868 |
| Si | -10.09426078985440 | 2.89481882056853  | -1.32174535404508 |
| Si | -10.00385818689707 | -3.05730343488772 | -1.37619110303717 |
| Si | -11.65545402263234 | 1.08754634930249  | -1.34877337458437 |
| Si | -0.35477370217432  | -1.22785438991670 | -1.39715587387291 |
| Si | -1.83266850166944  | 2.58682491461287  | -1.26475389315936 |
| Si | -2.01259685159859  | -2.22117508991331 | -2.77108591113824 |

|    |                    |                   |                   |
|----|--------------------|-------------------|-------------------|
| Si | -4.11847671510372  | 2.13197548808709  | -1.25107028658069 |
| Si | -3.81468862897704  | -2.20067128998584 | -1.27882367171404 |
| Si | -5.87772119629270  | 3.73844979737679  | -1.24788331463772 |
| Si | -5.98432986754175  | -5.93765108621282 | -1.31569415843875 |
| Si | -4.90106082817296  | -0.08510588672077 | -1.16819977048066 |
| Si | -5.92355589798865  | 6.13359823746610  | -1.23489029159887 |
| Si | -5.76713178934080  | -3.57928474660219 | -1.29213944024557 |
| Si | -7.24695155406229  | 0.00967959589114  | -1.29440000547295 |
| Si | -0.12800378930748  | -7.79260872275689 | -1.39207593833112 |
| Si | 1.70706019821769   | -6.28292435064238 | -1.41291050776400 |
| Si | 3.83299491209934   | -7.32792436187203 | -1.44498495897502 |
| Si | 5.76918723750679   | -5.91418852172174 | -1.43714384030405 |
| Si | 5.65581692768699   | -3.53866403849727 | -1.37407519149705 |
| Si | 7.67125341066066   | -2.24499793175916 | -1.33434402835375 |
| Si | 9.87228659528340   | -3.07784836443299 | -1.32628867063365 |
| Si | 11.58034880031781  | -1.41068931478597 | -1.26118565463562 |
| Si | 11.70324185098555  | 0.98622628233003  | -1.21034225822700 |
| Si | 10.22112491232772  | 2.85998120269268  | -1.19446746140544 |
| Si | 7.91264362013205   | 2.38174205379562  | -1.22871176846780 |
| Si | 7.24466047016836   | 0.09273136998606  | -1.27840428935126 |
| Si | 4.90263320899185   | 0.18760377016747  | -1.34091749249638 |
| Si | 4.21106347484019   | 2.41412302401609  | -1.24562831968351 |
| Si | 6.05902347245642   | 3.91391973259220  | -1.20111723504021 |
| Si | 6.08423933348164   | 6.30262649764671  | -1.16170037748408 |
| Si | 4.20902216118400   | 7.80964723596552  | -1.14692092740623 |
| Si | 1.94707359035205   | 7.07905271269523  | -1.17393675447154 |
| Si | 0.04404992625365   | 8.54485787044766  | -1.16057800212549 |
| Si | -1.86949145246196  | 7.09355716976858  | -1.19859098003052 |
| Si | -1.16095265567287  | 4.84096637254718  | -1.21685858682491 |
| Si | 1.17903166294498   | 4.84512722069544  | -1.21460915039971 |
| Si | 1.88958010788985   | 2.61314318529770  | -1.26422487114637 |
| Si | 0.03349222084321   | 1.11452648791901  | -1.28197696878175 |
| Si | -4.14723631814546  | 7.75637954793010  | -1.19962648682358 |
| Si | -11.63726549908743 | -1.31378899076973 | -1.37170247551961 |
| Si | -4.01037821053821  | -7.26815970188448 | -1.33512942137656 |
| Si | -1.89803453729220  | -6.20652761783876 | -1.39705095190352 |
| Si | -1.02957664025606  | -4.21794672832076 | -2.22817316614079 |
| Si | 1.18183760133737   | -4.48256008977581 | -2.79881150170068 |
| Si | 1.62061769631203   | -2.62122994623727 | -1.46512332796451 |
| Si | 3.88258944596498   | -1.93821792457515 | -1.35389852828853 |
| Si | -7.83992260963421  | 2.29882423791476  | 1.13023058763205  |
| Si | -7.82476903059119  | -2.30192179295644 | 1.08597710517716  |
| Si | -10.12623556802941 | 2.87176055661295  | 1.09033645189256  |
| Si | -10.04630656647303 | -3.07637608969973 | 1.04209005152302  |

|    |                    |                   |                  |
|----|--------------------|-------------------|------------------|
| Si | -11.68956341851625 | 1.06545899867968  | 1.03677892229913 |
| Si | -0.34069413330976  | -1.23199036288860 | 1.03180193499535 |
| Si | -1.84829137274958  | 2.56646291485249  | 1.16475949114837 |
| Si | -1.92878236454688  | -2.35298707649816 | 2.36627953397907 |
| Si | -4.13573675595821  | 2.13995336270246  | 1.17135920287328 |
| Si | -3.91815419484761  | -2.20821252838813 | 1.16056398779960 |
| Si | -5.90961114243289  | 3.73026399003466  | 1.16264589208420 |
| Si | -5.97241075621464  | -5.97088534708340 | 1.09067204387434 |
| Si | -4.91152804140385  | -0.06875869746743 | 1.23453097828128 |
| Si | -5.95450125436261  | 6.12241285435631  | 1.17551462570752 |
| Si | -5.82661445914407  | -3.61335908158759 | 1.10851487213336 |
| Si | -7.25366715196640  | -0.00695345306303 | 1.12063244178182 |
| Si | -0.15045025515505  | -7.87762945303710 | 0.98549254504013 |
| Si | 1.77350490762735   | -6.50770447036404 | 0.99507256154889 |
| Si | 3.93042482514332   | -7.43717070833149 | 0.95217103018077 |
| Si | 5.81685251208590   | -5.97742027294690 | 0.97349553076382 |
| Si | 5.65415200025226   | -3.60745237153181 | 1.02338281819987 |
| Si | 7.65687471657844   | -2.29842484385838 | 1.09999557590649 |
| Si | 9.85610399557747   | -3.13192391077116 | 1.09058658356061 |
| Si | 11.56054913438696  | -1.45932950648604 | 1.12680952291346 |
| Si | 11.68733534217247  | 0.93784336675922  | 1.17469482561106 |
| Si | 10.20932258975976  | 2.81358734340990  | 1.21668198391248 |
| Si | 7.90195063783328   | 2.33570205948885  | 1.20553352348306 |
| Si | 7.25106517261775   | 0.04185322695227  | 1.13703903355261 |
| Si | 4.90697346588601   | 0.15284483957021  | 1.07158625985870 |
| Si | 4.20664429382357   | 2.37666774841924  | 1.18067983904991 |
| Si | 6.05343576555434   | 3.87345614740429  | 1.20675361108510 |
| Si | 6.07226281376933   | 6.26294198458668  | 1.24634616691428 |
| Si | 4.19754415555599   | 7.77230364714379  | 1.26157095227030 |
| Si | 1.93494815835115   | 7.04513747053141  | 1.24535716573117 |
| Si | 0.03007556106464   | 8.51098665982028  | 1.25219026602463 |
| Si | -1.88657342694204  | 7.06185736744029  | 1.22572574612815 |
| Si | -1.16688490849778  | 4.81332784526466  | 1.18587923871745 |
| Si | 1.17188232435079   | 4.80924017259500  | 1.19815671124413 |
| Si | 1.88811950914259   | 2.57533630555871  | 1.17558493405774 |
| Si | 0.01402871446547   | 1.09573447015545  | 1.13959526024902 |
| Si | -4.16555343942679  | 7.72975117494039  | 1.20897545491491 |
| Si | -11.67995669321996 | -1.33525874776357 | 1.01421764328889 |
| Si | -3.98245987884083  | -7.28525225455680 | 1.05738021114615 |
| Si | -1.86437539036656  | -6.22844837240483 | 1.02750769930191 |
| Si | -1.24829748493511  | -4.58981810379065 | 2.59984259443071 |
| Si | 1.08586023572640   | -4.53735114444576 | 2.02607033876803 |
| Si | 1.62789526092059   | -2.54375208887707 | 0.92492253441832 |
| Si | 3.90533178613480   | -1.98788868858069 | 1.06744933850413 |

|   |                    |                   |                   |
|---|--------------------|-------------------|-------------------|
| C | 2.08349919557468   | -4.37790698440823 | 3.56966410408828  |
| O | -1.57621290443539  | -5.14743052206895 | 4.16331571849974  |
| O | 2.74472191976734   | -4.26647371293282 | 4.51038590197648  |
| H | -10.53283367024508 | 4.06368728466915  | -2.14857222012267 |
| H | -10.38044316095075 | -4.23025215794250 | -2.22784677197392 |
| H | -12.90490492166973 | 1.51396623442209  | -2.06241945085788 |
| H | -7.09333010976432  | -6.50758840080139 | -2.14678499839145 |
| H | -7.09527680464054  | 6.70355505602188  | -1.97869700651502 |
| H | -0.18967162705432  | -8.96764641918041 | -2.31368036217742 |
| H | 4.00784313523492   | -8.54325892967263 | -2.30217311195920 |
| H | 6.89228698657175   | -6.48949447077851 | -2.24702065435569 |
| H | 10.21655319096526  | -4.25586835991356 | -2.18400575272394 |
| H | 12.80759313467974  | -1.90111267358114 | -1.97140790345002 |
| H | 12.98378005444835  | 1.36831291113833  | -1.89294926228547 |
| H | 10.72592181406626  | 4.01514680944842  | -2.00216351964142 |
| H | 7.23896381377357   | 6.92194191189329  | -1.89101068180900 |
| H | 4.53195770912408   | 9.05579310000098  | -1.91448181694447 |
| H | 0.05918365570330   | 9.78287877808352  | -2.00360255829797 |
| H | -4.51982790693503  | 8.97518436307417  | -1.98786384234929 |
| H | -12.86707302940115 | -1.75870619037220 | -2.10717009508250 |
| H | -4.07063689654357  | -8.51510256950392 | -2.16049801477527 |
| H | -10.59448368136645 | 4.02140665996250  | 1.92806991980549  |
| H | -10.43900804984311 | -4.26285665971209 | 1.86747794295211  |
| H | -12.95685117206714 | 1.48482536291522  | 1.72273599592257  |
| H | -7.04717087284347  | -6.58617852953430 | 1.93493660865394  |
| H | -7.14019383078464  | 6.69105602194465  | 1.89779959678972  |
| H | -0.23526366683690  | -9.06652559687217 | 1.89015630564447  |
| H | 4.08756872066633   | -8.69827881183228 | 1.74289149425954  |
| H | 6.95966649591553   | -6.56126916621276 | 1.74901102460626  |
| H | 10.19046464043440  | -4.34480916390896 | 1.90286354117510  |
| H | 12.77497182399812  | -1.97996771624492 | 1.83771900490844  |
| H | 12.95918704933489  | 1.28631783565946  | 1.89078401500547  |
| H | 10.70600542256399  | 3.93517580204961  | 2.07508829127740  |
| H | 7.21763940118906   | 6.85929903510616  | 2.00892074554814  |
| H | 4.51716961669536   | 8.99194205135145  | 2.07194277141338  |
| H | 0.03753208987739   | 9.72455725155191  | 2.13038402211845  |
| H | -4.53934907198159  | 8.93380304296810  | 2.01916446506642  |
| H | -12.93471387413756 | -1.79118615781047 | 1.69892509655353  |
| H | -4.03357133972520  | -8.53053389710298 | 1.88873995778197  |
| H | -2.00937070509597  | -1.76610131967233 | 3.74097323360286  |
| H | -1.66311107812341  | -6.11524052065966 | 4.23658512993894  |



- **Hck-CO+H<sub>2</sub>O**

|    |                    |                   |                   |
|----|--------------------|-------------------|-------------------|
| Si | -7.88647170586605  | 2.46105062879534  | -1.22884852396292 |
| Si | -7.82758321051376  | -2.15787507041118 | -1.32225928323793 |
| Si | -10.17771987548844 | 3.01075425763173  | -1.18691255399582 |
| Si | -10.03656296632143 | -2.95936372200751 | -1.31592601730946 |
| Si | -11.70953263707611 | 1.17692782246550  | -1.20119165453886 |
| Si | -0.20351612393922  | -1.19849175997782 | -1.34971359729377 |
| Si | -1.82747004974221  | 2.59283272467903  | -1.23820587853164 |
| Si | -1.89127260394117  | -2.42233835609132 | -2.36645518668449 |
| Si | -4.13798030667696  | 2.28072182462420  | -1.22600231884589 |
| Si | -3.95763413760237  | -1.97258679327176 | -1.55972947073121 |
| Si | -5.92775679709871  | 3.85256822042270  | -1.19245559212320 |
| Si | -5.97864254500430  | -5.79693174055029 | -1.39427397314652 |
| Si | -4.99302741198712  | 0.09987399815220  | -1.22375749380569 |
| Si | -5.92559072141488  | 6.24424200548292  | -1.15898773139178 |
| Si | -5.80129194908116  | -3.43179494383374 | -1.35253075935518 |
| Si | -7.34055256881515  | 0.15477677233128  | -1.26014738069623 |
| Si | -0.02076266011712  | -7.98684769274941 | -1.35808882583985 |
| Si | 1.68743393741619   | -6.30906824080071 | -1.23699058209308 |
| Si | 3.81979614080005   | -7.34920134157276 | -1.27305940253479 |
| Si | 5.79304607298308   | -5.98735199389049 | -1.29854714665327 |
| Si | 5.73241824664318   | -3.61003982071888 | -1.28733353464637 |
| Si | 7.74092811249866   | -2.30569991159029 | -1.28972800680962 |
| Si | 9.95638429986722   | -3.10182073614555 | -1.29307278949831 |
| Si | 11.64983981752925  | -1.41889809177336 | -1.27171514806988 |
| Si | 11.75305424513722  | 0.97890175713001  | -1.25935617963822 |
| Si | 10.24689150234006  | 2.83248771386248  | -1.25835133383143 |
| Si | 7.94583061921671   | 2.32235323292380  | -1.25847879327704 |
| Si | 7.28118884272690   | 0.02796116462484  | -1.27009013916760 |
| Si | 4.93717738625652   | 0.10158517101125  | -1.33173278113384 |
| Si | 4.25718707357921   | 2.33551245470817  | -1.25547820692885 |
| Si | 6.09376306387467   | 3.85423401802658  | -1.23566702081322 |
| Si | 6.11712451016161   | 6.24469536756290  | -1.21428046370333 |
| Si | 4.25904463156105   | 7.77538380951610  | -1.18805268788053 |
| Si | 1.99531076887762   | 7.05694836500814  | -1.18823006032003 |
| Si | 0.09537229557523   | 8.52285421470047  | -1.15815314545989 |
| Si | -1.82518155926615  | 7.07703947162169  | -1.17001352027480 |
| Si | -1.10429787031940  | 4.82849554911520  | -1.18647695594378 |
| Si | 1.23507058048650   | 4.82070676869557  | -1.20475281347182 |
| Si | 1.94206175298287   | 2.58545827423937  | -1.24559853864446 |
| Si | 0.05542394473109   | 1.13208716896394  | -1.26530588801240 |
| Si | -4.08991373642841  | 7.79430995490926  | -1.14543579616041 |
| Si | -11.67598710260223 | -1.22382561820732 | -1.24953621508112 |

|    |                    |                   |                   |
|----|--------------------|-------------------|-------------------|
| Si | -4.17949954071659  | -7.37587521246041 | -1.44148534351571 |
| Si | -1.94889897545692  | -6.60002275759818 | -1.47320265911026 |
| Si | -1.07907469416317  | -4.41239804149691 | -1.50199436906920 |
| Si | 1.01198509132868   | -4.54563244790760 | -2.62307070580067 |
| Si | 1.66430854263846   | -2.69526532250247 | -1.34352175220022 |
| Si | 3.93134657519038   | -2.03406400469938 | -1.29404338972791 |
| Si | -7.86800964834402  | 2.40843812636448  | 1.20659709242623  |
| Si | -7.80261041856864  | -2.20674741851979 | 1.10731180850873  |
| Si | -10.15978773348465 | 2.95785599481261  | 1.22627437930527  |
| Si | -10.01331896120570 | -3.00782948314209 | 1.10361135529404  |
| Si | -11.69396194210978 | 1.12810760617939  | 1.18481259294978  |
| Si | -0.29370291612447  | -1.21941747240895 | 1.14983168778926  |
| Si | -1.82226165335194  | 2.57158622541731  | 1.19439546819532  |
| Si | -1.86543334330916  | -2.51749128705415 | 2.30578613566746  |
| Si | -4.12792591372224  | 2.24366336672561  | 1.19228090622362  |
| Si | -3.88842630985637  | -2.03823718941014 | 1.33318623885395  |
| Si | -5.91966945220674  | 3.81494072658518  | 1.21986597107739  |
| Si | -5.97729952178928  | -5.83654119778853 | 1.00563503784653  |
| Si | -4.94670884227845  | 0.04777485197864  | 1.21226006544544  |
| Si | -5.91631919135799  | 6.20890406156403  | 1.25173861314288  |
| Si | -5.76746452263821  | -3.46816947196048 | 1.06107076955017  |
| Si | -7.29427240589786  | 0.10417114978621  | 1.14516145958511  |
| Si | -0.11070191030733  | -8.06805581789870 | 1.03222052019584  |
| Si | 1.73299832681905   | -6.58784915081234 | 1.18236874752742  |
| Si | 3.92544077880136   | -7.43384226487062 | 1.12483184637408  |
| Si | 5.83661424219721   | -5.99991221765528 | 1.11360722996140  |
| Si | 5.74840573611081   | -3.62889849776842 | 1.11292921905790  |
| Si | 7.75471532203976   | -2.32213590413078 | 1.14626136541931  |
| Si | 9.96727795243667   | -3.12162295563670 | 1.12385407276403  |
| Si | 11.65417050671021  | -1.43066110919547 | 1.11626411933425  |
| Si | 11.76038682179908  | 0.96806122913010  | 1.12622241602367  |
| Si | 10.26130416620799  | 2.82754369500146  | 1.15278650466759  |
| Si | 7.96245024106207   | 2.31433652273266  | 1.17576057354103  |
| Si | 7.33692046518507   | 0.01484062483490  | 1.14650905744964  |
| Si | 4.99283936008515   | 0.10695423469764  | 1.08410650359935  |
| Si | 4.26711623482063   | 2.32334792077829  | 1.17294636893483  |
| Si | 6.10330818473399   | 3.83661430327127  | 1.17230447800729  |
| Si | 6.13017167886679   | 6.22413941633262  | 1.19344856718963  |
| Si | 4.27153029935314   | 7.75224699645810  | 1.22048901430115  |
| Si | 2.00796803676243   | 7.02908503223532  | 1.23483479807517  |
| Si | 0.10677207197380   | 8.49438073697997  | 1.25650612614873  |
| Si | -1.81489606841627  | 7.04932096264711  | 1.25018532145463  |
| Si | -1.09641676323397  | 4.80296222164850  | 1.22058096360904  |
| Si | 1.24259441241511   | 4.79230748665084  | 1.20264845428691  |

|    |                    |                   |                   |
|----|--------------------|-------------------|-------------------|
| Si | 1.94817319290826   | 2.55272586659044  | 1.18734892551882  |
| Si | 0.04988933785372   | 1.10550489157576  | 1.17293667078610  |
| Si | -4.08068690122960  | 7.76097384474123  | 1.26569893865902  |
| Si | -11.65503123984660 | -1.27226227186398 | 1.13661185871174  |
| Si | -4.18260030975769  | -7.41206964987416 | 0.96454314591765  |
| Si | -1.97639842648790  | -6.58774257537442 | 0.93943951350016  |
| Si | -1.29513287051657  | -4.33963854655975 | 0.94109392917638  |
| Si | 0.88728975899635   | -4.54046002519686 | 1.80279797297038  |
| Si | 1.70366265661266   | -2.50320409237300 | 1.05911864484525  |
| Si | 3.98931653181797   | -2.02159632187444 | 1.13259495250132  |
| C  | 0.85317910396492   | -4.27059471348347 | 3.67644438395164  |
| O  | -1.08797544313532  | -5.77426840644694 | 4.10041538247950  |
| O  | 1.07874568463430   | -3.96178292864188 | 4.76136402848782  |
| H  | -10.65650843222171 | 4.18209414964902  | -1.98721871268980 |
| H  | -10.41458647037362 | -4.12234044181143 | -2.17955312729753 |
| H  | -12.97917720590162 | 1.59856257993000  | -1.88085018304062 |
| H  | -7.16227613881369  | -6.25796778014864 | -2.19062338030333 |
| H  | -7.09062839232894  | 6.84448608309442  | -1.88857094707711 |
| H  | 0.14823516586001   | -9.17281601453234 | -2.25516669601126 |
| H  | 3.98337910051531   | -8.58160214028304 | -2.10944858393587 |
| H  | 6.90477673589917   | -6.60119859217010 | -2.09577822962666 |
| H  | 10.30586041759868  | -4.28871170783257 | -2.13645424889799 |
| H  | 12.87485081764368  | -1.90966290596678 | -1.98573184732717 |
| H  | 13.02105411131199  | 1.36562461786277  | -1.96254098096300 |
| H  | 10.72324663210466  | 3.98019803086341  | -2.09374475044406 |
| H  | 7.26477316764425   | 6.85809533087323  | -1.96004178940090 |
| H  | 4.58235023515931   | 9.01315741481595  | -1.96871930913771 |
| H  | 0.09992736508380   | 9.75809126042081  | -2.00552715854157 |
| H  | -4.43494881105294  | 9.02845644001390  | -1.92246686166061 |
| H  | -12.92359746061823 | -1.66531813212386 | -1.95600257985905 |
| H  | -4.52363785529440  | -8.56610875045221 | -2.28402189507369 |
| H  | -10.62037384925426 | 4.09439655026144  | 2.08526891424884  |
| H  | -10.38010716100444 | -4.20344087080538 | 1.92691325913554  |
| H  | -12.95489057160141 | 1.51970803098549  | 1.89781027577103  |
| H  | -7.15650137730014  | -6.32048680285176 | 1.79509498934852  |
| H  | -7.07347215103261  | 6.79088697999621  | 2.00832178312995  |
| H  | -0.17934557982536  | -9.25386144883427 | 1.94424522741995  |
| H  | 4.13241478826079   | -8.69128145179956 | 1.91174019396128  |
| H  | 6.96677958809222   | -6.59561970466242 | 1.89875759867918  |
| H  | 10.32783463128077  | -4.31882634621658 | 1.94798144063872  |
| H  | 12.88172016700100  | -1.92726614297438 | 1.82196017189652  |
| H  | 13.03404454923914  | 1.34185757368987  | 1.82628168603901  |
| H  | 10.75112973295943  | 3.96957486997595  | 1.98813650680707  |
| H  | 7.28804356410845   | 6.81946155947907  | 1.93790773165428  |

|   |                    |                   |                  |
|---|--------------------|-------------------|------------------|
| H | 4.60218360191754   | 8.97454772735675  | 2.02221928959952 |
| H | 0.11512693264774   | 9.70926684748440  | 2.13287089615108 |
| H | -4.42233936348512  | 8.97206643988822  | 2.07975774696743 |
| H | -12.88899571036248 | -1.74683063991411 | 1.84576678628210 |
| H | -4.44958151249926  | -8.63466839093505 | 1.78829381764249 |
| H | -1.74676175423466  | -5.13121013672402 | 3.76215634145621 |
| H | -1.11645720787819  | -6.48237130232815 | 3.42299403813178 |

### Transition states

- **TS1'' (Hck...H<sub>2</sub> → Hck-H<sub>2</sub>) in 55**

|    |            |            |           |
|----|------------|------------|-----------|
| Si | 26.9292914 | 2.4708135  | 3.2061685 |
| Si | 26.8708473 | -2.1395963 | 3.4623246 |
| Si | 29.1684722 | 3.1328589  | 3.5068453 |
| Si | 29.1067200 | -2.7757924 | 3.8384520 |
| Si | 30.7475850 | 1.3743490  | 3.8432123 |
| Si | 19.1965430 | -0.8484490 | 2.2404306 |
| Si | 21.0250364 | 3.1407784  | 2.2474510 |
| Si | 20.9750910 | -2.3906255 | 2.5841365 |
| Si | 23.2260053 | 2.4113780  | 2.6101519 |
| Si | 23.2521865 | -2.0238835 | 2.8889279 |
| Si | 25.0581751 | 3.9152501  | 2.8049182 |
| Si | 24.9846740 | -5.9999848 | 3.3833926 |
| Si | 24.0082286 | 0.1966204  | 2.8563495 |
| Si | 25.1779012 | 6.2909968  | 2.7060312 |
| Si | 24.9839212 | -3.6113301 | 3.2401489 |
| Si | 26.3287738 | 0.1707277  | 3.2365521 |
| Si | 19.0055823 | -8.3022561 | 2.6263224 |
| Si | 17.1546414 | -6.8098927 | 2.2775980 |
| Si | 14.8856678 | -7.4421172 | 1.9634675 |
| Si | 13.1216741 | -5.8444102 | 1.6071040 |
| Si | 13.2274831 | -3.4582141 | 1.4963786 |
| Si | 11.4005564 | -1.9354444 | 1.1362755 |
| Si | 9.1357213  | -2.4842021 | 0.7856792 |
| Si | 7.6296092  | -0.6662278 | 0.4276334 |
| Si | 7.7222901  | 1.7279501  | 0.3124639 |
| Si | 9.3821995  | 3.4319462  | 0.5087203 |
| Si | 11.5756928 | 2.6805179  | 0.9174439 |
| Si | 12.0520817 | 0.3572557  | 1.1065211 |
| Si | 14.3750542 | 0.2912485  | 1.4600978 |

|    |            |            |            |
|----|------------|------------|------------|
| Si | 15.2431748 | 2.4832916  | 1.5535418  |
| Si | 13.5209580 | 4.0635914  | 1.1365755  |
| Si | 13.5003998 | 6.4414553  | 1.0094439  |
| Si | 15.3974985 | 7.8809786  | 1.2365069  |
| Si | 17.5679507 | 7.0424547  | 1.6054287  |
| Si | 19.4542268 | 8.4748497  | 1.7295322  |
| Si | 21.1328641 | 6.8185703  | 2.0716095  |
| Si | 20.4681257 | 5.0572112  | 3.4685896  |
| Si | 18.2135013 | 5.0660503  | 2.6010740  |
| Si | 17.4978659 | 3.0175836  | 1.8206969  |
| Si | 19.3016383 | 1.5124073  | 2.0779626  |
| Si | 23.3048548 | 7.7401003  | 2.3162280  |
| Si | 30.7170694 | -1.0204629 | 3.9762947  |
| Si | 23.1681962 | -7.5675705 | 3.1996926  |
| Si | 20.9267154 | -6.8755337 | 2.8326071  |
| Si | 20.2547804 | -4.6249524 | 2.5945852  |
| Si | 17.9379413 | -4.5819991 | 2.2705405  |
| Si | 17.3235227 | -2.3225708 | 2.0648448  |
| Si | 15.0492893 | -1.9407033 | 1.7070432  |
| H  | 29.4638623 | 4.3527119  | 4.3235038  |
| H  | 29.3768297 | -3.8992904 | 4.7906215  |
| H  | 31.8701688 | 1.8530221  | 4.7159082  |
| H  | 26.0251416 | -6.5438446 | 4.3170784  |
| H  | 26.1875856 | 6.9181348  | 3.6206408  |
| H  | 18.8541597 | -9.4784963 | 3.5406520  |
| H  | 14.3848700 | -8.6108700 | 2.7563771  |
| H  | 11.8437452 | -6.3729292 | 2.1875163  |
| H  | 8.5347264  | -3.5919048 | 1.5941824  |
| H  | 6.2682746  | -1.0304276 | 0.9427913  |
| H  | 6.3976278  | 2.2475662  | 0.7879364  |
| H  | 8.8923124  | 4.6606825  | 1.2099640  |
| H  | 12.2678770 | 7.0970111  | 1.5571540  |
| H  | 15.0887624 | 9.1614664  | 1.9487293  |
| H  | 19.3959471 | 9.7118764  | 2.5674133  |
| H  | 23.4299156 | 9.0245846  | 3.0767516  |
| H  | 31.8338496 | -1.4253555 | 4.8927381  |
| H  | 23.3836935 | -8.7430319 | 4.1038975  |
| Si | 27.3122746 | 2.3241038  | 0.8043388  |
| Si | 27.2440659 | -2.2830338 | 1.0607853  |
| Si | 29.5460208 | 2.9930871  | 1.1247585  |
| Si | 29.4782018 | -2.9140139 | 1.4587738  |
| Si | 31.1214075 | 1.2381324  | 1.4884362  |
| Si | 19.5368713 | -0.9864855 | -0.1586228 |
| Si | 21.4233345 | 2.8552366  | -0.2014150 |

|    |            |            |            |
|----|------------|------------|------------|
| Si | 21.3309193 | -2.5203897 | 0.1800300  |
| Si | 23.6376560 | 2.2708653  | 0.2246925  |
| Si | 23.6140728 | -2.1693960 | 0.4900210  |
| Si | 25.4510960 | 3.7884896  | 0.4382002  |
| Si | 25.3460127 | -6.1408963 | 1.0062865  |
| Si | 24.3788285 | 0.0467706  | 0.4850389  |
| Si | 25.5814807 | 6.1602437  | 0.3307511  |
| Si | 25.3480966 | -3.7524571 | 0.8660475  |
| Si | 26.6998531 | 0.0268157  | 0.8486665  |
| Si | 19.3581203 | -8.4364557 | 0.2460212  |
| Si | 17.5127151 | -6.9417807 | -0.1144467 |
| Si | 15.2437121 | -7.5751370 | -0.4137974 |
| Si | 13.4864658 | -5.9720811 | -0.7701453 |
| Si | 13.5971037 | -3.5855462 | -0.8794011 |
| Si | 11.7808287 | -2.0609305 | -1.2651193 |
| Si | 9.5169957  | -2.6146607 | -1.5923383 |
| Si | 8.0114290  | -0.7938377 | -1.9249175 |
| Si | 8.1098836  | 1.6011196  | -2.0407572 |
| Si | 9.7717715  | 3.3066407  | -1.8723029 |
| Si | 11.9687331 | 2.5574958  | -1.4858355 |
| Si | 12.4295212 | 0.2320057  | -1.2792293 |
| Si | 14.7486677 | 0.1700851  | -0.9168720 |
| Si | 15.6484981 | 2.3459702  | -0.8408684 |
| Si | 13.9187893 | 3.9310762  | -1.2286277 |
| Si | 13.9072914 | 6.3133832  | -1.3631857 |
| Si | 15.8117539 | 7.7562104  | -1.1282993 |
| Si | 17.9504327 | 6.7959895  | -0.7807090 |
| Si | 19.7662364 | 8.3330270  | -0.6272648 |
| Si | 21.5346187 | 6.7803230  | -0.3527409 |
| Si | 20.7163061 | 4.7989912  | -1.1503292 |
| Si | 18.5728593 | 4.8235099  | -1.8548501 |
| Si | 17.8862649 | 2.9986691  | -0.5910702 |
| Si | 19.5954930 | 1.3706819  | -0.3074140 |
| Si | 23.7160092 | 7.6075289  | -0.0421847 |
| Si | 31.0855178 | -1.1566131 | 1.6215350  |
| Si | 23.5247599 | -7.7036875 | 0.8221731  |
| Si | 21.2842870 | -7.0132327 | 0.4395778  |
| Si | 20.6169486 | -4.7585650 | 0.2131946  |
| Si | 18.3003075 | -4.7169819 | -0.1117531 |
| Si | 17.6799779 | -2.4641898 | -0.3401065 |
| Si | 15.4134551 | -2.0655179 | -0.6882810 |
| H  | 30.0900567 | 4.1179719  | 0.2998617  |
| H  | 30.0087013 | -4.1316889 | 0.7678096  |
| H  | 32.4671538 | 1.6344059  | 0.9565040  |

|   |            |            |            |
|---|------------|------------|------------|
| H | 26.6022692 | -6.7782712 | 0.4914035  |
| H | 26.8332767 | 6.7125249  | -0.2827107 |
| H | 19.4429818 | -9.7077372 | -0.5403714 |
| H | 14.9813399 | -8.8321696 | -1.1863728 |
| H | 12.4260501 | -6.5668723 | -1.6484077 |
| H | 9.1888770  | -3.8149748 | -2.4249762 |
| H | 6.8753882  | -1.2269823 | -2.8039362 |
| H | 7.0151322  | 2.0422948  | -2.9668032 |
| H | 9.5469434  | 4.4485265  | -2.8141218 |
| H | 12.9100436 | 6.8726980  | -2.3337476 |
| H | 15.7034387 | 8.9523031  | -2.0235066 |
| H | 19.8903935 | 9.4688682  | -1.5899211 |
| H | 24.0486587 | 8.7983292  | -0.8867779 |
| H | 32.4195567 | -1.6467907 | 1.1407100  |
| H | 23.9758896 | -8.9690094 | 0.1582131  |
| H | 17.5700918 | 5.1541817  | 4.1464769  |
| H | 18.5789946 | 5.1450802  | 4.2741515  |

- **TS1 (Hck-CO<sub>2</sub> → Hck-COOH)**

|    |                    |                   |                   |
|----|--------------------|-------------------|-------------------|
| Si | -7.94076868513584  | 2.36613408475388  | -1.25784292322211 |
| Si | -7.70983707984750  | -2.26578918986941 | -1.35891476535498 |
| Si | -10.24106979513447 | 2.87182077613816  | -1.29856226312289 |
| Si | -9.91859442434716  | -3.07568407590743 | -1.42020460094498 |
| Si | -11.73087490125494 | 1.00652617246134  | -1.36154263047439 |
| Si | 0.32809795566991   | -1.27519338217143 | -1.18560108441383 |
| Si | -1.91930575499582  | 2.54799070892493  | -1.14856283236394 |
| Si | -1.65916085033960  | -2.61307053556254 | -1.17951859542350 |
| Si | -4.24262350288944  | 2.38459149622118  | -1.16638797755677 |
| Si | -3.92705669050692  | -1.95184991822357 | -1.23348365585596 |
| Si | -6.08633237749806  | 3.88911601303008  | -1.18301112301561 |
| Si | -5.78951993572172  | -5.93410312594874 | -1.42795133247137 |
| Si | -4.95386672601289  | 0.16598685414479  | -1.25591210951237 |
| Si | -6.11371522025146  | 6.27461415715602  | -1.15703117188562 |
| Si | -5.69281544469290  | -3.55856435144347 | -1.33469630763123 |
| Si | -7.29546216112470  | 0.07056760337207  | -1.28129679036318 |
| Si | 0.11506638038252   | -7.93206060346144 | -1.34419963420153 |
| Si | 1.91074944070736   | -6.35985958898939 | -1.28337803931274 |
| Si | 4.06806066631732   | -7.33021734464617 | -1.33482610987449 |
| Si | 5.98276890466163   | -5.90841786980387 | -1.34221785737329 |
| Si | 5.78655411054996   | -3.54128525776981 | -1.30253103813423 |
| Si | 7.79335692830726   | -2.23809266113067 | -1.37914980555501 |
| Si | 10.02109417923702  | -2.99191585388186 | -1.44366115142306 |
| Si | 11.64294760144464  | -1.23698554339873 | -1.46017594301675 |

|    |                    |                   |                   |
|----|--------------------|-------------------|-------------------|
| Si | 11.65943271599074  | 1.16456267576588  | -1.42961819028900 |
| Si | 10.10091981088029  | 2.97373646168304  | -1.36926265186743 |
| Si | 7.82249291078189   | 2.38122676437126  | -1.31132335431323 |
| Si | 7.27791283465428   | 0.06810427130910  | -1.31025180254587 |
| Si | 4.93530092761290   | -0.01385270700055 | -1.17449152845275 |
| Si | 4.11500473261255   | 2.18699050316801  | -1.18737333437038 |
| Si | 5.87931347346938   | 3.78788248759157  | -1.21909531299512 |
| Si | 5.91655859806156   | 6.17934170719383  | -1.20698193053170 |
| Si | 4.10044325849781   | 7.75123164999550  | -1.16518154024400 |
| Si | 1.83945054830816   | 7.03639984664625  | -1.15173874311519 |
| Si | -0.07686709640579  | 8.48210816573610  | -1.14125594590800 |
| Si | -1.97875916608447  | 7.01886240000109  | -1.14243820791309 |
| Si | -1.20996831616527  | 4.78341946552329  | -1.13096479381634 |
| Si | 1.12830770274767   | 4.78703060761030  | -1.13652301881805 |
| Si | 1.81465962716956   | 2.54296233612011  | -1.14891966521265 |
| Si | -0.04635993587498  | 1.06625642522940  | -1.12369900884203 |
| Si | -4.23275780452451  | 7.77040326596227  | -1.13383548737237 |
| Si | -11.61235562253294 | -1.39127520667314 | -1.41147222084779 |
| Si | -3.89587568555044  | -7.40316927155668 | -1.43457610026662 |
| Si | -1.73510705193662  | -6.44617783846291 | -1.28510287531513 |
| Si | -1.13824608797192  | -4.51021990569923 | -2.41081675844172 |
| Si | 1.07006755897116   | -4.29287476718388 | -1.94382068179320 |
| Si | 1.94780217145071   | -2.25812784884064 | -2.60395536631057 |
| Si | 3.85423396849096   | -2.12849075734857 | -1.27275394591995 |
| Si | -7.99662944029094  | 2.32827377525766  | 1.17621713221231  |
| Si | -7.77298943459540  | -2.32317539134536 | 1.07757458288791  |
| Si | -10.29966683661890 | 2.82554555707954  | 1.11162677072679  |
| Si | -9.98178748493182  | -3.12818275478887 | 0.99451391980690  |
| Si | -11.78526195909253 | 0.95621615050975  | 1.02280208137342  |
| Si | 0.16613639322669   | -1.22012351278589 | 1.30222147103295  |
| Si | -1.95582792526654  | 2.55593233009634  | 1.28675313181424  |
| Si | -1.78849292786147  | -2.59487669788013 | 1.23152413204250  |
| Si | -4.28367569408795  | 2.35633441727958  | 1.25895458890276  |
| Si | -4.04942740747774  | -2.00124956486901 | 1.18551801879724  |
| Si | -6.13582128294062  | 3.85599500683866  | 1.22504503222866  |
| Si | -5.86636937832674  | -6.02638831605544 | 0.98132780793198  |
| Si | -5.01963167283919  | 0.14039799234475  | 1.15960901463652  |
| Si | -6.12731965600853  | 6.24588412600863  | 1.25022416492522  |
| Si | -5.77227325473997  | -3.64397717283565 | 1.06244384087340  |
| Si | -7.36241997937182  | 0.02462248529325  | 1.13595119736055  |
| Si | 0.09550747400299   | -8.08769731163724 | 1.04073221442370  |
| Si | 1.92596553380807   | -6.55807020151650 | 1.13847969468375  |
| Si | 4.11950972193269   | -7.43007374858912 | 1.06168235303125  |
| Si | 6.01664057548705   | -5.97129516356955 | 1.06187196849684  |



|    |                    |                   |                   |
|----|--------------------|-------------------|-------------------|
| Si | 5.90193471171856   | -3.60658316104282 | 1.09881433964193  |
| Si | 7.87835674812021   | -2.26304640217092 | 1.05541464707172  |
| Si | 10.10432634186092  | -3.01853900836136 | 0.97259515879826  |
| Si | 11.72556380330095  | -1.26563912540842 | 0.92524753316800  |
| Si | 11.73622344672107  | 1.13510396838832  | 0.95473149833219  |
| Si | 10.17790840569255  | 2.94457552645563  | 1.04213644300607  |
| Si | 7.89550751724038   | 2.36183357556576  | 1.12176025035551  |
| Si | 7.33952050760344   | 0.04667977753469  | 1.10377875067768  |
| Si | 5.00024680962027   | 0.02137353899304  | 1.23257517590215  |
| Si | 4.15792430192371   | 2.20579251921994  | 1.23419675215830  |
| Si | 5.95061384437091   | 3.77686899154403  | 1.19121615726004  |
| Si | 5.95734488843772   | 6.16767554029046  | 1.20334165097076  |
| Si | 4.12428816922903   | 7.72837293555694  | 1.24448752556341  |
| Si | 1.85042416475922   | 7.03600014573443  | 1.27224265661809  |
| Si | -0.06963489987172  | 8.48357959886230  | 1.27299911667664  |
| Si | -1.97467459418539  | 7.01805678140206  | 1.27841786906153  |
| Si | -1.21560125158727  | 4.78126718752578  | 1.28110935762020  |
| Si | 1.12630656411418   | 4.78702501186656  | 1.26864669672437  |
| Si | 1.84819180010096   | 2.54989735763997  | 1.28215912728380  |
| Si | -0.05422101227596  | 1.11637417371434  | 1.29879066781893  |
| Si | -4.23866141021004  | 7.74356137562612  | 1.27475305294125  |
| Si | -11.67145332800023 | -1.44149968862461 | 0.97523062202982  |
| Si | -4.02006263085748  | -7.55605911093541 | 0.95890974332947  |
| Si | -1.83364128821486  | -6.69854301305513 | 1.11222583109911  |
| Si | -1.21630490676656  | -4.68534099559364 | 2.00823795648811  |
| Si | 1.12164355144477   | -4.58694602087022 | 2.05378723545687  |
| Si | 1.99166359638974   | -2.43332530952312 | 2.10852183246099  |
| Si | 4.06402981504670   | -2.12338260561405 | 1.16975860555613  |
| C  | 0.37591047334402   | -4.47104415620518 | 3.89383842386449  |
| O  | -0.92052457222799  | -4.74892515464860 | 3.81591279542890  |
| O  | 0.87455675689552   | -4.01094369440091 | 4.94123636834382  |
| H  | -10.70327431288161 | 4.03201829276669  | -2.12438209297450 |
| H  | -10.24655677235470 | -4.24970248376339 | -2.28971156861108 |
| H  | -12.98875602469598 | 1.39306452149337  | -2.08271713288418 |
| H  | -6.92002220206048  | -6.48382251209390 | -2.24550949066018 |
| H  | -7.25983723118269  | 6.88605406329889  | -1.90603175499683 |
| H  | 0.18987550043782   | -9.07132618582249 | -2.31029849281700 |
| H  | 4.18328501013024   | -8.54998939351037 | -2.19451073199224 |
| H  | 7.10619891326726   | -6.45170484240180 | -2.17226231450670 |
| H  | 10.39040400310262  | -4.15947662293566 | -2.30534891958214 |
| H  | 12.86289629294600  | -1.67467360302601 | -2.21607600943555 |
| H  | 12.89653937982429  | 1.59283591564707  | -2.16311187910034 |
| H  | 10.52109822259031  | 4.14450823759864  | -2.20277152045876 |
| H  | 7.07402157988768   | 6.75942762422596  | -1.96442933687787 |

|   |                    |                   |                   |
|---|--------------------|-------------------|-------------------|
| H | 4.43210412543377   | 8.98145902315740  | -1.95387631305216 |
| H | -0.08370396868889  | 9.70775637220326  | -2.00234629296504 |
| H | -4.53330219678681  | 9.01695092884828  | -1.90961471395776 |
| H | -12.81936738132868 | -1.87500517937281 | -2.16021642605866 |
| H | -4.08433350398462  | -8.58227393467759 | -2.33812506162957 |
| H | -10.81919804220050 | 3.94761006417238  | 1.95595241695865  |
| H | -10.35225367013768 | -4.33764858149755 | 1.79582750952562  |
| H | -13.07498094383391 | 1.31366454246448  | 1.70164230720453  |
| H | -7.03367630801308  | -6.62847982688012 | 1.70563198684102  |
| H | -7.26820307759632  | 6.86750823801398  | 1.99952431978856  |
| H | 0.15712549241891   | -9.32380832842435 | 1.87997973082656  |
| H | 4.34626595921658   | -8.68563872715094 | 1.84488160397768  |
| H | 7.14372137059727   | -6.55539467130842 | 1.85918456388140  |
| H | 10.51682679125764  | -4.20467161579356 | 1.78823265676761  |
| H | 12.99314057983173  | -1.72097174772498 | 1.58630111428222  |
| H | 13.01662334636458  | 1.54965458812352  | 1.61867535505913  |
| H | 10.65986185527853  | 4.09179516120061  | 1.87508164339835  |
| H | 7.12669212816686   | 6.76582298170483  | 1.92813850998052  |
| H | 4.48692073610007   | 8.93989708104195  | 2.04893599068674  |
| H | -0.07978849007287  | 9.70860508760244  | 2.13519285104218  |
| H | -4.56137783127291  | 8.96847991191913  | 2.07613301430608  |
| H | -12.91423408663845 | -1.95181848605244 | 1.64343865661502  |
| H | -4.28289614938758  | -8.82443344195669 | 1.70887662419335  |
| H | 2.31719961857347   | -2.51148103167232 | 3.94706005691265  |
| H | 1.84051790977061   | -3.15200727885409 | 4.44062438842125  |

- **TS2 (Hck-COOH → Hck-HCOOH)**

|    |                    |                   |                   |
|----|--------------------|-------------------|-------------------|
| Si | -7.99625711240153  | 2.30040669089382  | -1.24842142093195 |
| Si | -7.71846676283445  | -2.33401971224977 | -1.31176425308617 |
| Si | -10.30455122030220 | 2.77624226322544  | -1.24850898901086 |
| Si | -9.92023110560212  | -3.16593214060964 | -1.32784764621834 |
| Si | -11.77526124947038 | 0.89445143802100  | -1.26969958743487 |
| Si | 0.29953410456549   | -1.22475599032570 | -1.33712602514637 |
| Si | -1.97186515054368  | 2.56792438253405  | -1.23001571385394 |
| Si | -1.66455618426572  | -2.59320900194666 | -1.29278884777901 |
| Si | -4.29541796459572  | 2.36024649910148  | -1.23553493248916 |
| Si | -3.94460646029893  | -1.98389906728753 | -1.28609493981499 |
| Si | -6.15623449631616  | 3.84862067305677  | -1.21334237315104 |
| Si | -5.73586502369029  | -5.99954298964258 | -1.33706639466141 |
| Si | -4.98012254333924  | 0.13040035100161  | -1.31260999534439 |
| Si | -6.17959089339351  | 6.23796087215197  | -1.18069635690832 |
| Si | -5.69261361625539  | -3.61730659276009 | -1.30844375224058 |
| Si | -7.32032977372164  | 0.01029970406981  | -1.27112747300556 |

|    |                    |                   |                   |
|----|--------------------|-------------------|-------------------|
| Si | 0.12878877324070   | -7.93101214360107 | -1.39636823012017 |
| Si | 1.97885541242450   | -6.41445303469948 | -1.48162545858927 |
| Si | 4.18323385138411   | -7.29257723257524 | -1.52121503869000 |
| Si | 6.01599300842383   | -5.77012730553393 | -1.41862496488569 |
| Si | 5.75209905531830   | -3.42412787867424 | -1.26653866760127 |
| Si | 7.77854114202860   | -2.16233037102953 | -1.31436917448132 |
| Si | 9.99480825742778   | -2.94901925613557 | -1.38981466205232 |
| Si | 11.62513758887738  | -1.20164531928138 | -1.40303069765607 |
| Si | 11.64294884879141  | 1.19894080240008  | -1.37481278292240 |
| Si | 10.08427538746749  | 3.00563610119412  | -1.32285813525377 |
| Si | 7.80071643064806   | 2.43288672394218  | -1.23947984236681 |
| Si | 7.23775900982490   | 0.12812344537875  | -1.22051493945600 |
| Si | 4.88984784098624   | 0.02836170465592  | -1.17609984011146 |
| Si | 4.08747112925273   | 2.23372389128038  | -1.17038244712119 |
| Si | 5.85677664301575   | 3.82858660463685  | -1.18096038296543 |
| Si | 5.86439222233421   | 6.22181578086484  | -1.16998497833422 |
| Si | 4.04098656693508   | 7.78654470540982  | -1.14114748995520 |
| Si | 1.77903461410407   | 7.07002043032035  | -1.15215238243197 |
| Si | -0.14692682269942  | 8.50595131426481  | -1.13213386337367 |
| Si | -2.04239202655510  | 7.03284041594363  | -1.16155303189638 |
| Si | -1.26154434574691  | 4.80317894460076  | -1.18299887928394 |
| Si | 1.07627550822189   | 4.81849874231466  | -1.18226191280045 |
| Si | 1.79044101364154   | 2.58390128492458  | -1.20602964088496 |
| Si | -0.07548253628172  | 1.11087729950063  | -1.24843680363923 |
| Si | -4.30793619316435  | 7.75146687544804  | -1.15266915540424 |
| Si | -11.63312898602036 | -1.50206840393774 | -1.30192503168374 |
| Si | -3.79407723239037  | -7.40097589078318 | -1.31395957953854 |
| Si | -1.66041692477536  | -6.38440117647773 | -1.20591694142077 |
| Si | -1.10891099356401  | -4.52163844455483 | -2.45949052317471 |
| Si | 1.10507693701090   | -4.32494225373398 | -2.03821674372631 |
| Si | 1.96758827011001   | -2.26571540687937 | -2.64440194314423 |
| Si | 3.79904833976960   | -2.06594942043748 | -1.25045203530403 |
| Si | -8.01387540254304  | 2.27303836604928  | 1.18650817382721  |
| Si | -7.74001418630778  | -2.36865781338747 | 1.12551248548993  |
| Si | -10.32176108927987 | 2.74825196385805  | 1.16197382895161  |
| Si | -9.93940833795287  | -3.20165089819514 | 1.08785694018700  |
| Si | -11.78879849647035 | 0.86334157592718  | 1.11552454370337  |
| Si | 0.19379685876387   | -1.20966327656715 | 1.12952634774075  |
| Si | -1.99471156126613  | 2.54160543389772  | 1.20477726317691  |
| Si | -1.73174415192423  | -2.60015336679412 | 1.10622173680929  |
| Si | -4.31539252241695  | 2.33213896938147  | 1.19023693907613  |
| Si | -3.99769362490133  | -2.01546507684679 | 1.13789168100185  |
| Si | -6.17227028587942  | 3.81903726893009  | 1.19485663776585  |
| Si | -5.77551273840566  | -6.03569703662644 | 1.07469152266293  |

|    |                    |                   |                   |
|----|--------------------|-------------------|-------------------|
| Si | -5.01782807585450  | 0.10808816292200  | 1.10269484606927  |
| Si | -6.18861691606873  | 6.20667323946975  | 1.22660565483048  |
| Si | -5.72054670253461  | -3.65679961843515 | 1.09216202824227  |
| Si | -7.36080169845750  | -0.02192992183926 | 1.14707817390827  |
| Si | 0.16353558894921   | -8.08248196869437 | 0.98515834381956  |
| Si | 2.01862043186435   | -6.59245826742084 | 0.92828130618589  |
| Si | 4.20951172172112   | -7.45157104384333 | 0.87127205470374  |
| Si | 6.03919964588996   | -5.90979587727428 | 0.97910766185064  |
| Si | 5.87092914590284   | -3.53883414000305 | 1.13591127836766  |
| Si | 7.86780600261115   | -2.21468944034817 | 1.11758600256588  |
| Si | 10.08505304256445  | -2.98913553461624 | 1.02661046007987  |
| Si | 11.69770998768621  | -1.22828674419510 | 0.98230545678169  |
| Si | 11.70510638726278  | 1.17437024591532  | 1.01001797858347  |
| Si | 10.16944169521106  | 3.00646827219297  | 1.08829314803536  |
| Si | 7.88385445773516   | 2.43957183088699  | 1.19385359267033  |
| Si | 7.38716050791872   | 0.11283738948399  | 1.18545089609918  |
| Si | 5.04560915815932   | 0.08029597138534  | 1.24177849543392  |
| Si | 4.12559382068948   | 2.23474731750686  | 1.24841105669064  |
| Si | 5.90858988392438   | 3.82031982644781  | 1.23048094093928  |
| Si | 5.89215211005200   | 6.21178611644989  | 1.24075070375482  |
| Si | 4.04666235363895   | 7.75394617742225  | 1.26918964699913  |
| Si | 1.78069706148614   | 7.03510533590163  | 1.26873592344260  |
| Si | -0.14863912870933  | 8.47169042433888  | 1.28251635686636  |
| Si | -2.04751540017047  | 7.00071015741585  | 1.25908485441481  |
| Si | -1.26877559544627  | 4.77001474181285  | 1.22703434549981  |
| Si | 1.07186652040496   | 4.78204587201576  | 1.22272170698871  |
| Si | 1.80697116262282   | 2.54664997137005  | 1.22753598426478  |
| Si | -0.09197334534121  | 1.11216297968228  | 1.18583031815213  |
| Si | -4.31469969666656  | 7.71825757851631  | 1.25579643611027  |
| Si | -11.64822431250862 | -1.53354077394327 | 1.08575635167725  |
| Si | -3.88767505746796  | -7.51091172586551 | 1.08011855324168  |
| Si | -1.70571888123377  | -6.62585539592711 | 1.21820864034567  |
| Si | -0.98522634763096  | -4.58384818224810 | 2.02071663429728  |
| Si | 1.34737518458287   | -4.61886038781943 | 1.86649550163833  |
| Si | 1.93078951595417   | -2.36225022473471 | 2.16468936616431  |
| Si | 4.04878282972746   | -2.03156014627024 | 1.30286470136833  |
| C  | 0.77988527957084   | -4.46038314508911 | 3.76391429023198  |
| O  | -0.57740863821523  | -4.42525315980906 | 3.76566497719155  |
| O  | 1.25609453490465   | -4.97846825981959 | 4.92343511138045  |
| H  | -10.79845745761013 | 3.92341371852601  | -2.07428294465734 |
| H  | -10.25054940302568 | -4.34979746807891 | -2.18317351918329 |
| H  | -13.04915940734584 | 1.26299051701543  | -1.97212428067369 |
| H  | -6.85254818947095  | -6.60831173332856 | -2.13183890020140 |
| H  | -7.32496821080168  | 6.85849202052182  | -1.92385668807407 |

|   |                    |                   |                   |
|---|--------------------|-------------------|-------------------|
| H | 0.05232201741461   | -9.06416199537687 | -2.36977703559127 |
| H | 4.41327358848307   | -8.46481473427102 | -2.42325263367641 |
| H | 7.18370330030155   | -6.19153028586856 | -2.25823230339038 |
| H | 10.34289731548698  | -4.11336327349640 | -2.26442430823924 |
| H | 12.84569426505517  | -1.64710322385845 | -2.15328104743117 |
| H | 12.88434055010246  | 1.62933307499024  | -2.09967782266502 |
| H | 10.48840040764196  | 4.17073233408070  | -2.17198847292524 |
| H | 7.02272900268227   | 6.80510474399904  | -1.92382590726744 |
| H | 4.38833506007475   | 9.01757312703569  | -1.92212872281699 |
| H | -0.15436363890354  | 9.74394409302604  | -1.97562018495933 |
| H | -4.62754860138425  | 8.99693558633822  | -1.92283890672398 |
| H | -12.84859043817875 | -2.00415602342630 | -2.02456266849236 |
| H | -3.93481384325728  | -8.60679942706718 | -2.19086080880255 |
| H | -10.83363169411003 | 3.87300126320270  | 2.00746534968829  |
| H | -10.28279735993285 | -4.40881345961124 | 1.90467821057807  |
| H | -13.07067372740225 | 1.21248253648761  | 1.81340967799026  |
| H | -6.92303057145678  | -6.63527814620778 | 1.83174149903431  |
| H | -7.33820658908295  | 6.80910197981580  | 1.97811563910090  |
| H | 0.30105877034104   | -9.31550181395009 | 1.82087715732371  |
| H | 4.44496963424370   | -8.72011471386493 | 1.63123254545894  |
| H | 7.18123107411215   | -6.48148513759547 | 1.76508733047607  |
| H | 10.50450996540845  | -4.17740098053902 | 1.83554114417612  |
| H | 12.96685735194271  | -1.67283451629683 | 1.64764257426170  |
| H | 12.98750272650576  | 1.57991943880495  | 1.67594874864655  |
| H | 10.68278673187239  | 4.15413492692384  | 1.90162100409180  |
| H | 7.05470832404455   | 6.81613661237434  | 1.97127154031717  |
| H | 4.38573057424570   | 8.96710301721272  | 2.08135066194605  |
| H | -0.16625175090816  | 9.68490260162603  | 2.16132423268816  |
| H | -4.64139938020029  | 8.94024401256076  | 2.05997216107129  |
| H | -12.87301188293332 | -2.05243791781675 | 1.78023414664750  |
| H | -4.13470979946768  | -8.77351956448265 | 1.84566511466944  |
| H | 1.23171967672730   | -3.10426218808133 | 3.73780339131009  |
| H | 2.22182157506428   | -5.09053067187082 | 4.83296604736096  |

- **TS3 (Hck-HCOOH → Hck-HOCHOH)**

|    |                    |                   |                   |
|----|--------------------|-------------------|-------------------|
| Si | -7.92826302563646  | 2.30021034186433  | -1.26953591589101 |
| Si | -7.70042579375145  | -2.34199947898505 | -1.43549933795541 |
| Si | -10.23020401695538 | 2.79291188730913  | -1.18206230677256 |
| Si | -9.90451978366560  | -3.16548173772011 | -1.41107956311703 |
| Si | -11.71039818743112 | 0.91725134639302  | -1.21141848514771 |
| Si | 0.27419147722624   | -1.11595713912629 | -1.64033050668676 |
| Si | -1.88929414853582  | 2.60855211541477  | -1.34737270612522 |
| Si | -1.69849634637547  | -2.32747747052144 | -2.19156319625643 |

|    |                    |                   |                   |
|----|--------------------|-------------------|-------------------|
| Si | -4.20587583046373  | 2.29246227493491  | -1.31665185929213 |
| Si | -3.91968038167039  | -2.03299368532201 | -1.51560737692006 |
| Si | -6.04974335011084  | 3.80146787801754  | -1.22217497473154 |
| Si | -5.73005349978738  | -6.03169403245784 | -1.44089623320034 |
| Si | -4.96743122445864  | 0.07652766114412  | -1.30664078976417 |
| Si | -6.13839017767369  | 6.18934041736529  | -1.12943979330919 |
| Si | -5.68795107248844  | -3.65053304505006 | -1.47984125683397 |
| Si | -7.31059816542915  | 0.00095422955758  | -1.34886623875931 |
| Si | 0.24334928631464   | -7.72233230342934 | -1.14567428602832 |
| Si | 1.99928135267862   | -6.16421835349505 | -0.80017905411279 |
| Si | 4.05227262192456   | -7.22936422348679 | -1.25772886826297 |
| Si | 5.98234867061585   | -5.85055174478257 | -1.44560081309591 |
| Si | 5.75933841555471   | -3.46992973759818 | -1.53408633551831 |
| Si | 7.75296915643816   | -2.12192584695656 | -1.52495124191060 |
| Si | 9.97850820345872   | -2.88875497220509 | -1.50954181907797 |
| Si | 11.63129221165191  | -1.16750434643580 | -1.42437466959300 |
| Si | 11.67223694982985  | 1.23218751790476  | -1.34249644103088 |
| Si | 10.13075080591364  | 3.05758758770817  | -1.30226762301201 |
| Si | 7.83830842617358   | 2.51088838471820  | -1.36754968002267 |
| Si | 7.25139975946918   | 0.20147102904228  | -1.45127965020784 |
| Si | 4.90398043582643   | 0.16467564056156  | -1.45397024820416 |
| Si | 4.16223529699941   | 2.39485604804557  | -1.37444031656346 |
| Si | 5.93232156885743   | 3.98688519980785  | -1.30575591199736 |
| Si | 5.90107825466231   | 6.38090794180930  | -1.21312426742455 |
| Si | 4.04056833184984   | 7.90895689696625  | -1.13249869572882 |
| Si | 1.77386324282720   | 7.19472276354091  | -1.13584371931434 |
| Si | -0.17421363205307  | 8.60047012488520  | -1.06045701420962 |
| Si | -2.04259426517325  | 7.09401437129714  | -1.12109789285165 |
| Si | -1.25503257095577  | 4.86842022305092  | -1.21787564919431 |
| Si | 1.08555457821416   | 4.94088549978246  | -1.22627831732764 |
| Si | 1.85266711031893   | 2.73291872429089  | -1.35650173204476 |
| Si | 0.03564184435022   | 1.20873819589122  | -1.41791287365768 |
| Si | -4.32025241084332  | 7.76487982660557  | -1.07761063895822 |
| Si | -11.59406889315846 | -1.48000993414984 | -1.30281501374306 |
| Si | -3.75022597509341  | -7.35066160048627 | -1.33963104346238 |
| Si | -1.66323828466954  | -6.33909057609273 | -0.92259764828610 |
| Si | -0.95720577601372  | -4.17535074266258 | -1.20562255670505 |
| Si | 1.38374159844635   | -3.92496526140408 | -1.00884538073063 |
| Si | 1.87822803852808   | -2.46609913788663 | -2.81451743243553 |
| Si | 3.86863876658287   | -1.96424731393110 | -1.61259209238003 |
| Si | -7.87215324499695  | 2.20171523912476  | 1.16249495021124  |
| Si | -7.65814375318453  | -2.40910746057008 | 0.99835381766295  |
| Si | -10.17571349693760 | 2.69204541142547  | 1.22705510292396  |
| Si | -9.85643866254645  | -3.24728688914569 | 1.00399261670998  |

|    |                    |                   |                  |
|----|--------------------|-------------------|------------------|
| Si | -11.66714557442041 | 0.82822819898955  | 1.17229937328347 |
| Si | 0.14078106967267   | -1.31049439964868 | 0.78129976412496 |
| Si | -1.85131398504904  | 2.49854744284628  | 1.07982713895363 |
| Si | -1.67776497730747  | -2.67225865694815 | 1.44580802592776 |
| Si | -4.16239872887803  | 2.21808377653686  | 1.10119138394521 |
| Si | -3.86545336861333  | -2.12796121055717 | 0.87584884825421 |
| Si | -6.01228635900674  | 3.71605865970699  | 1.18782078207918 |
| Si | -5.75134929226901  | -6.05244624957216 | 0.96776287698120 |
| Si | -4.86308375772308  | -0.00825681914879 | 1.10810368406558 |
| Si | -6.12144502576262  | 6.10055694102257  | 1.27801301716151 |
| Si | -5.64124582751629  | -3.68605761150403 | 0.92088979864013 |
| Si | -7.20765826373732  | -0.08403310533652 | 1.06352526866077 |
| Si | 0.21643821943882   | -8.21541903276832 | 1.19165176778066 |
| Si | 2.07654025811902   | -6.74940841071481 | 1.54517153129230 |
| Si | 4.28572765108158   | -7.48988850860164 | 1.11185866906763 |
| Si | 6.02934268854055   | -5.84666516998462 | 0.96579416389708 |
| Si | 5.77539544510232   | -3.50394012328068 | 0.86584003417087 |
| Si | 7.74457691532194   | -2.16858317137152 | 0.91179635048123 |
| Si | 9.95837234716486   | -2.95952273151219 | 0.90690439471127 |
| Si | 11.62041891102068  | -1.24689688267372 | 0.96217066636355 |
| Si | 11.66075158341281  | 1.15104568428787  | 1.04216320992151 |
| Si | 10.10491701410597  | 2.96026344562259  | 1.10691124775380 |
| Si | 7.81172080189836   | 2.41646277261578  | 1.06384700722953 |
| Si | 7.18416166552759   | 0.12422716964525  | 0.96515357943250 |
| Si | 4.83287674364806   | 0.11435685057391  | 0.95066535275556 |
| Si | 4.14497474664722   | 2.34423229209392  | 1.04801321096287 |
| Si | 5.93034434325924   | 3.90605886882461  | 1.10331017747571 |
| Si | 5.92071130536764   | 6.29410117089490  | 1.19395572860603 |
| Si | 4.06422627502901   | 7.82172873062098  | 1.27404546046630 |
| Si | 1.79763196884191   | 7.10007183357270  | 1.28255999396756 |
| Si | -0.15770198419771  | 8.49852721661762  | 1.34948124854143 |
| Si | -2.03100728680427  | 6.99290613355577  | 1.29837561299836 |
| Si | -1.23672483806372  | 4.76861385596908  | 1.18949465481068 |
| Si | 1.09698361871010   | 4.84737065690345  | 1.18685805128030 |
| Si | 1.84481851142391   | 2.62917498929493  | 1.07356817168362 |
| Si | 0.05485191923577   | 1.05252728099592  | 1.00580807918941 |
| Si | -4.30637017956308  | 7.67502625787321  | 1.32867517391208 |
| Si | -11.55255158651287 | -1.56782548708396 | 1.08299229866391 |
| Si | -3.94376911299112  | -7.62968071890998 | 1.03200472656434 |
| Si | -1.74549935623565  | -6.86395174774976 | 1.45109382527977 |
| Si | -1.00586527143428  | -4.80828793616404 | 2.18119721813685 |
| Si | 1.30303667676898   | -4.74386656281901 | 2.45309680786117 |
| Si | 1.81602944956178   | -2.90272058275583 | 1.14621717209605 |
| Si | 3.92716377487715   | -2.05591884618692 | 0.81275386969513 |

|   |                    |                   |                   |
|---|--------------------|-------------------|-------------------|
| C | 0.59647245116973   | -4.45974735695143 | 4.28595815039706  |
| O | -0.88934773769736  | -4.31657479759133 | 3.94322038003625  |
| O | 0.76516695826024   | -5.45441872786463 | 5.21848742802769  |
| H | -10.75227848846378 | 3.96410471746213  | -1.95481994289534 |
| H | -10.27113110940787 | -4.32870639655848 | -2.27964109525980 |
| H | -12.99930235912167 | 1.30659692171713  | -1.87383841182484 |
| H | -6.79855977778192  | -6.71043423406684 | -2.24386152614346 |
| H | -7.31254454616261  | 6.78759844124304  | -1.84556044446611 |
| H | 0.32621562704796   | -8.69504385614665 | -2.27889131930888 |
| H | 3.90195959472094   | -8.37351185503042 | -2.21149360684077 |
| H | 7.05993957207430   | -6.50925618943432 | -2.25446918223593 |
| H | 10.37515129010715  | -4.04727104804003 | -2.37194441545228 |
| H | 12.87393041166755  | -1.60185707491029 | -2.14485360338168 |
| H | 12.93972603373159  | 1.66368546367763  | -2.02065936341879 |
| H | 10.61447323949673  | 4.24276347611136  | -2.07955578581181 |
| H | 7.04096973711065   | 7.03811461813135  | -1.93397916121773 |
| H | 4.35687099809824   | 9.17028014968784  | -1.87791709093045 |
| H | -0.21482311072074  | 9.86138460405694  | -1.86791317443433 |
| H | -4.68561349699456  | 9.01169889231385  | -1.82474611094059 |
| H | -12.83142684451140 | -1.95212114708505 | -2.00791252411370 |
| H | -3.65057830113588  | -8.48812018211367 | -2.30685221547649 |
| H | -10.64418604853785 | 3.79881571737360  | 2.11994032381085  |
| H | -10.17328422465842 | -4.46845258282390 | 1.81057909513672  |
| H | -12.92755650691222 | 1.17290979684984  | 1.91003860952277  |
| H | -6.92802677474448  | -6.56409569127534 | 1.74329490639545  |
| H | -7.29113510973765  | 6.62535114674031  | 2.05604127905295  |
| H | 0.20295863841607   | -9.56630436145936 | 1.83489443078073  |
| H | 4.78051577783938   | -8.72990264506540 | 1.79271475334585  |
| H | 7.23384511379410   | -6.27851576518339 | 1.74794393255818  |
| H | 10.30684986184448  | -4.16904924345993 | 1.71883901399683  |
| H | 12.85092025997194  | -1.74085771923307 | 1.66478338185335  |
| H | 12.91577804335012  | 1.54562882243502  | 1.76451732136627  |
| H | 10.54462340105936  | 4.08558921399742  | 1.99191102155053  |
| H | 7.08141949357406   | 6.87397338663472  | 1.94671472323069  |
| H | 4.40039697262566   | 9.02314645749797  | 2.10482490606135  |
| H | -0.19634728382761  | 9.68676352545871  | 2.26102664989505  |
| H | -4.65943836334730  | 8.86251243677886  | 2.17212944317298  |
| H | -12.76261502891759 | -2.09763570741131 | 1.79439196884103  |
| H | -4.36198556156009  | -8.90431944962655 | 1.69694132923206  |
| H | 0.86848419857972   | -3.50400525209937 | 4.76233569233501  |
| H | 0.73670336167783   | -6.31908775891695 | 4.76466405685580  |
| H | -1.68210297668088  | -2.29046462285501 | 3.25682243006179  |
| H | -1.31793436764111  | -3.11935243129523 | 3.72819943785642  |



- **TS4 (Hck-HOCHOH → Hck-OCH-H<sub>2</sub>O)**

|    |                    |                   |                   |
|----|--------------------|-------------------|-------------------|
| Si | -7.83876681328449  | 2.35949952306765  | -1.26916417589279 |
| Si | -7.70187480820841  | -2.25512869817115 | -1.46570813302843 |
| Si | -10.13411104169261 | 2.88835731345686  | -1.24245873903452 |
| Si | -9.91207655453228  | -3.06155865511135 | -1.50496488951850 |
| Si | -11.65218611889939 | 1.04559387342176  | -1.32121022672417 |
| Si | 0.06214924021254   | -1.09407353933426 | -1.56059237397068 |
| Si | -1.84230883576468  | 2.66154331747432  | -1.25472207843412 |
| Si | -1.77826754335163  | -2.20326709525812 | -2.63036446416978 |
| Si | -4.13738553625104  | 2.25677626806563  | -1.24251568808774 |
| Si | -3.79010976684404  | -2.08781615574332 | -1.40450651270323 |
| Si | -5.93276806511593  | 3.81985442902964  | -1.16861530318830 |
| Si | -5.88297436860058  | -5.91609480903363 | -1.48560175554012 |
| Si | -4.88496864806907  | 0.02874664888375  | -1.24623671142848 |
| Si | -6.00047947397147  | 6.21116243431589  | -1.05978454030856 |
| Si | -5.68665778504013  | -3.55172251019901 | -1.46413188882124 |
| Si | -7.23234730837551  | 0.06117979120002  | -1.35718666923981 |
| Si | 0.00274183188874   | -7.57237175951838 | -1.25485202833363 |
| Si | 1.83042127586166   | -6.11032936124853 | -0.86451933662188 |
| Si | 3.86825380029831   | -7.20083343242329 | -1.35409596894802 |
| Si | 5.81970517758561   | -5.84695442127681 | -1.50065042650699 |
| Si | 5.63948841394511   | -3.46410647078270 | -1.51625737059763 |
| Si | 7.67594218127445   | -2.18623293318120 | -1.48033547796152 |
| Si | 9.87443300150349   | -3.02600054708155 | -1.47758175236954 |
| Si | 11.57374678585058  | -1.35150832199697 | -1.35974684350118 |
| Si | 11.68294379964396  | 1.04471401233730  | -1.23556766841896 |
| Si | 10.19967835666006  | 2.91738045264908  | -1.16588678628430 |
| Si | 7.89082605597417   | 2.44450998136802  | -1.24381413687840 |
| Si | 7.25366283716199   | 0.15014944305052  | -1.37232941966489 |
| Si | 4.90764658976941   | 0.18039794301158  | -1.38133845662502 |
| Si | 4.20975538183479   | 2.41847347875728  | -1.25100142686565 |
| Si | 6.02026844151868   | 3.96297732122217  | -1.16028895043512 |
| Si | 6.01971292490797   | 6.35409295965742  | -1.03486455415379 |
| Si | 4.15941537904813   | 7.88093787517747  | -0.94527718130652 |
| Si | 1.88707516160250   | 7.18234447743146  | -0.97344008086725 |
| Si | -0.03615280511240  | 8.62179898079908  | -0.89463288557926 |
| Si | -1.92939052133188  | 7.14869454415341  | -0.98621027052455 |
| Si | -1.18800909202081  | 4.91046586088454  | -1.09625128367823 |
| Si | 1.15333553299694   | 4.94369221884083  | -1.09205279024533 |
| Si | 1.89779885630755   | 2.73047077564824  | -1.24740553500078 |
| Si | 0.05396179471693   | 1.24002169187766  | -1.32917050554838 |
| Si | -4.20722550350435  | 7.81288329647510  | -0.96319158895525 |
| Si | -11.58025977944055 | -1.35286427975722 | -1.42786710086389 |

|    |                    |                   |                   |
|----|--------------------|-------------------|-------------------|
| Si | -3.89774513015380  | -7.21670677871806 | -1.42463404081257 |
| Si | -1.85104312819424  | -6.10752892712715 | -1.04272983168440 |
| Si | -1.03863408728898  | -3.99246566998462 | -1.48387188575600 |
| Si | 1.26652905363591   | -3.85211201775692 | -0.97871955780412 |
| Si | 1.77155645813874   | -2.32850310047293 | -2.72188361247983 |
| Si | 3.79144175152676   | -1.90732073887214 | -1.54290036251055 |
| Si | -7.84243370187895  | 2.25088493586123  | 1.16191553778160  |
| Si | -7.72733339777256  | -2.34371759817447 | 0.96587937534384  |
| Si | -10.14102899750941 | 2.77438155177887  | 1.16693343289596  |
| Si | -9.93300416039969  | -3.16218624292372 | 0.91096482067803  |
| Si | -11.66748894999566 | 0.93978006939600  | 1.06220072983971  |
| Si | -0.06196464005736  | -1.30797085247581 | 0.85748381592711  |
| Si | -1.82439690736862  | 2.51418960463577  | 1.16901949037588  |
| Si | -1.79453707376655  | -2.46212545686505 | 2.01872879630452  |
| Si | -4.12935428612122  | 2.16803818898571  | 1.17670961087516  |
| Si | -3.85852559517020  | -2.17033713992857 | 1.00472534213693  |
| Si | -5.94110653648849  | 3.71619021597100  | 1.24146357538409  |
| Si | -5.91058534912169  | -5.99116572740538 | 0.92095654947896  |
| Si | -4.86671094349800  | -0.05018779340120 | 1.15975318277726  |
| Si | -6.02184592100078  | 6.10346268876029  | 1.34756634484765  |
| Si | -5.71290750319648  | -3.63318611756331 | 0.93416718656421  |
| Si | -7.20838183850062  | -0.03885832171826 | 1.05718428549639  |
| Si | -0.02798331333016  | -8.10945898072635 | 1.06493286404428  |
| Si | 1.91501980379159   | -6.77004934954636 | 1.46281431370535  |
| Si | 4.11258180107186   | -7.52925492860949 | 1.00103432228638  |
| Si | 5.87601372361236   | -5.90738843090417 | 0.90979600343043  |
| Si | 5.65414425352685   | -3.55788296874003 | 0.88083281897568  |
| Si | 7.66156921895289   | -2.27786484145038 | 0.95386468809186  |
| Si | 9.84871568537564   | -3.13868123695191 | 0.93705500850281  |
| Si | 11.55587980626966  | -1.47196069576878 | 1.02507453078820  |
| Si | 11.66258624942552  | 0.92244785509960  | 1.14704352998730  |
| Si | 10.16526844920136  | 2.77975268067249  | 1.24075986329560  |
| Si | 7.85561795316444   | 2.31174847577150  | 1.18580385948929  |
| Si | 7.17990213890250   | 0.03345022734466  | 1.04156734455780  |
| Si | 4.82931486973862   | 0.09734065848365  | 1.02082582318063  |
| Si | 4.18283765531592   | 2.33718615754336  | 1.16656649826604  |
| Si | 6.01245233467110   | 3.84734888001084  | 1.24799510162317  |
| Si | 6.02523223095805   | 6.23356914397093  | 1.37113023364775  |
| Si | 4.16614401468929   | 7.75968443849636  | 1.46006529450436  |
| Si | 1.89123352458828   | 7.05971510958296  | 1.44197910133887  |
| Si | -0.04162427718366  | 8.49150360485811  | 1.51412916344003  |
| Si | -1.94282092025768  | 7.01922999221287  | 1.43189357929564  |
| Si | -1.19018378341939  | 4.78026850850920  | 1.30542165010972  |
| Si | 1.14607591980252   | 4.82284091434382  | 1.32095941377861  |

|    |                    |                   |                   |
|----|--------------------|-------------------|-------------------|
| Si | 1.87941570694053   | 2.60284921368410  | 1.18753240506321  |
| Si | 0.06696671409242   | 1.05406269989504  | 1.08925433088037  |
| Si | -4.22159852600391  | 7.69479529033864  | 1.44210199697457  |
| Si | -11.60453236715061 | -1.45789933930882 | 0.95662224851104  |
| Si | -4.05876939265770  | -7.50831550420996 | 0.94613607016217  |
| Si | -1.89377664966844  | -6.63651518144418 | 1.32002454284771  |
| Si | -1.12780669091533  | -4.69956109495468 | 2.32145408674319  |
| Si | 1.22087414637706   | -4.72502722911719 | 2.34836015881179  |
| Si | 1.71021158063855   | -2.80597576940338 | 1.17549830989255  |
| Si | 3.85590019464623   | -2.04278812158098 | 0.87753937129559  |
| C  | 0.65510899534059   | -4.88358426266500 | 4.23862557635696  |
| O  | -0.80173520444808  | -4.89915365164090 | 4.16267860775778  |
| O  | 0.71014875432939   | -6.32539519208582 | 4.72316480411615  |
| H  | -10.61319133131198 | 4.07491256175463  | -2.02019751902559 |
| H  | -10.27381415398393 | -4.21223042299428 | -2.39287235201371 |
| H  | -12.91748712702748 | 1.46536110229055  | -2.01049354139354 |
| H  | -6.95763827667320  | -6.53142186114280 | -2.32919333676499 |
| H  | -7.17066289557914  | 6.81130427875041  | -1.78169156739136 |
| H  | 0.06642029318835   | -8.52556433879125 | -2.40556940454697 |
| H  | 3.69178382963589   | -8.31494032342461 | -2.33798012573447 |
| H  | 6.88530804995560   | -6.50280494595107 | -2.32739776158307 |
| H  | 10.23771317694838  | -4.17969198630842 | -2.36099349457714 |
| H  | 12.80567833931276  | -1.80876295513531 | -2.08448544220821 |
| H  | 12.96581963369509  | 1.44866683505129  | -1.90170441843855 |
| H  | 10.72320824890662  | 4.09953230317977  | -1.92156221392106 |
| H  | 7.16811761456116   | 7.01061931642244  | -1.74249463405263 |
| H  | 4.48821058551319   | 9.15300993817733  | -1.66700736189654 |
| H  | -0.04542294061377  | 9.89316709774297  | -1.68676059559380 |
| H  | -4.57397515878705  | 9.06443911628109  | -1.70180091428059 |
| H  | -12.80614255651203 | -1.79864564269628 | -2.16950368016994 |
| H  | -3.76180949789545  | -8.34540732105205 | -2.39736476540768 |
| H  | -10.62096972017997 | 3.88399816704766  | 2.05076980896368  |
| H  | -10.28835757714848 | -4.38480504295156 | 1.70007757877195  |
| H  | -12.93805826597595 | 1.30722351856151  | 1.77160979675043  |
| H  | -7.06092037312487  | -6.53196507538176 | 1.71615600523992  |
| H  | -7.20621846739016  | 6.63101115840292  | 2.10218238349612  |
| H  | -0.13446865563447  | -9.45915850842075 | 1.70413494548102  |
| H  | 4.56145200576677   | -8.80068620984426 | 1.65518907151099  |
| H  | 7.06925195757118   | -6.38725704477580 | 1.68164720032570  |
| H  | 10.16141202578588  | -4.37124570854555 | 1.72900604279259  |
| H  | 12.77139720834712  | -2.01162296870598 | 1.72034709531088  |
| H  | 12.92822916680358  | 1.26565769496978  | 1.87727800242460  |
| H  | 10.64224971158117  | 3.87343140405616  | 2.14589770139262  |
| H  | 7.18131736494344   | 6.79998788153520  | 2.14107418890414  |

|   |                    |                   |                  |
|---|--------------------|-------------------|------------------|
| H | 4.50712240053289   | 8.94892628880819  | 2.30675876431809 |
| H | -0.05682906441307  | 9.67012314732791  | 2.43911433870300 |
| H | -4.59420553957566  | 8.86892968430342  | 2.29612112060622 |
| H | -12.84334409473895 | -1.96684996493997 | 1.63328576310798 |
| H | -4.37238743118686  | -8.80824677040317 | 1.62009382846110 |
| H | 0.99861001687242   | -4.26770980766601 | 5.08264447012783 |
| H | 1.04520381863595   | -6.87645876825726 | 3.96062890064826 |
| H | -1.79652106415903  | -1.97181731356795 | 3.43660965760243 |
| H | -0.46057242400467  | -6.11093827955736 | 4.56632713947401 |

• **TS5 (Hck-OCH → Hck-CH<sub>2</sub>O)**

|    |                    |                   |                   |
|----|--------------------|-------------------|-------------------|
| Si | -7.81490568798427  | 2.33218138667111  | -1.22105485519780 |
| Si | -7.55807485756795  | -2.25230908390253 | -1.34746119178457 |
| Si | -10.11948354568678 | 2.81667574842289  | -1.21081869300125 |
| Si | -9.73913260789445  | -3.12894708350509 | -1.39379976282738 |
| Si | -11.58928499297193 | 0.93674617567227  | -1.27683578385504 |
| Si | 0.05637923655057   | -1.18161934054132 | -1.71359931315765 |
| Si | -1.81380332821036  | 2.64263501519681  | -1.31059934390298 |
| Si | -1.79619586298319  | -2.31104338729223 | -2.74310207206261 |
| Si | -4.10765225333399  | 2.28693652820624  | -1.24088766299847 |
| Si | -3.61320962686601  | -2.05394021903958 | -1.27439901184646 |
| Si | -5.92118310128117  | 3.81291732115291  | -1.16574791113415 |
| Si | -5.85958253726143  | -5.80918756935969 | -1.47834421333452 |
| Si | -4.79235421608864  | 0.04992248390304  | -1.10996273692426 |
| Si | -5.96460889852247  | 6.20524461052286  | -1.08589985847112 |
| Si | -5.51735724723795  | -3.47583898756508 | -1.36765397948817 |
| Si | -7.14439202377408  | 0.05770756308047  | -1.27022986805937 |
| Si | 0.00468239190372   | -7.63788023592282 | -1.19076379327790 |
| Si | 1.77427657416856   | -6.14141150737539 | -0.73884349679666 |
| Si | 3.79885133906474   | -7.28665027539961 | -1.08555878171027 |
| Si | 5.77468040909467   | -5.96691816030449 | -1.25306295744817 |
| Si | 5.61605335271907   | -3.57930933482387 | -1.39657170923120 |
| Si | 7.65145388924640   | -2.29986049257988 | -1.35655354489680 |
| Si | 9.85505807088978   | -3.12657169359293 | -1.29697230460100 |
| Si | 11.55169829300477  | -1.44866839294192 | -1.19889012083975 |
| Si | 11.66682569062305  | 0.94874003958209  | -1.13062249375342 |
| Si | 10.18608412883874  | 2.82505756502981  | -1.12472331929835 |
| Si | 7.88073409189200   | 2.33720707674880  | -1.22349761197120 |
| Si | 7.24119969874585   | 0.04164872164353  | -1.31282368318027 |
| Si | 4.89918756104501   | 0.07235195438103  | -1.39869462192941 |
| Si | 4.18940316368874   | 2.30553881342783  | -1.32061144396079 |
| Si | 5.99915893505590   | 3.84922545425669  | -1.19733246396059 |
| Si | 6.02588773607702   | 6.24435592457063  | -1.10211801754750 |

|                       |                    |                   |
|-----------------------|--------------------|-------------------|
| Si 4.19834669690171   | 7.81220786977192   | -1.02769644425064 |
| Si 1.92865892483604   | 7.12349232436512   | -1.05049818814668 |
| Si 0.02064944038172   | 8.57868388264254   | -0.96867958968711 |
| Si -1.87831827745448  | 7.11262870450162   | -1.05448642411237 |
| Si -1.13229664249786  | 4.87776994476684   | -1.15802236669889 |
| Si 1.20853518128792   | 4.87976703872663   | -1.16106127089845 |
| Si 1.88642232497607   | 2.64445893426136   | -1.34273650551275 |
| Si 0.03892804599505   | 1.15430128477407   | -1.42559579574844 |
| Si -4.15418277210007  | 7.78795744520049   | -1.02463127273805 |
| Si -11.45032420500291 | -1.45917563163613  | -1.36259978051630 |
| Si -3.95589679279901  | -7.22042478662894  | -1.48746980800496 |
| Si -1.88090422637998  | -6.19596067818589  | -0.99567611057766 |
| Si -1.10227614004383  | -4.03521824209960  | -1.41260878598240 |
| Si 1.24251736674804   | -3.90395225365809  | -1.03344509976817 |
| Si 1.80950076761567   | -2.42781303316840  | -2.79082443416635 |
| Si 3.77257591677725   | -2.01047527553622  | -1.52347468404119 |
| Si -7.81317662228637  | 2.25747425897435   | 1.20258157092699  |
| Si -7.62169922562473  | -2.33482886367642  | 1.09845075085959  |
| Si -10.12608604300599 | 2.72541912449150   | 1.20039102589432  |
| Si -9.80174697462597  | -3.20649260598600  | 1.02060683183917  |
| Si -11.61045000420564 | 0.85349745693814   | 1.10725467851792  |
| Si -0.06350999966933  | -1.40507513362729  | 0.70394665177807  |
| Si -1.79106691472581  | 2.48746373092933   | 1.10755044567009  |
| Si -1.64330461972680  | -2.62987534427643  | 1.95152286934999  |
| Si -4.10100360655397  | 2.20649469292302   | 1.20080667255160  |
| Si -3.75607847788785  | -2.11788169862411  | 1.20185046450703  |
| Si -5.91589646745768  | 3.74394374896469   | 1.25764446923417  |
| Si -5.90550424773083  | -5.96262058258237  | 0.92138474606783  |
| Si -4.80572783403005  | -0.011111705775255 | 1.28448438728424  |
| Si -5.97497747588988  | 6.13479989632205   | 1.32126276336134  |
| Si -5.59492917542902  | -3.60538471980371  | 1.04258755527753  |
| Si -7.14023271519621  | -0.02609635925715  | 1.15147597681781  |
| Si -0.05011715052591  | -8.21197880588104  | 1.13007616045085  |
| Si 1.73712129680802   | -6.69675321282379  | 1.61858061183071  |
| Si 3.94737758819260   | -7.49133355307838  | 1.30021976621466  |
| Si 5.76216882225632   | -5.92413198474654  | 1.15623585588152  |
| Si 5.59717320221884   | -3.58054918745795  | 1.00945669564251  |
| Si 7.60978532796464   | -2.32616731544027  | 1.08691359456639  |
| Si 9.79826021543122   | -3.18051073034738  | 1.11770120930092  |
| Si 11.50424781208007  | -1.51193187691988  | 1.18847625105668  |
| Si 11.61876436699159  | 0.88391842783431   | 1.25415178453440  |
| Si 10.12224819612450  | 2.74395381843686   | 1.28451743170043  |
| Si 7.81869661327545   | 2.25506690839941   | 1.20608744069074  |
| Si 7.15061741013696   | -0.01895148702240  | 1.10570249843033  |

|    |                    |                   |                   |
|----|--------------------|-------------------|-------------------|
| Si | 4.80222002993750   | 0.04344851145494  | 1.00608777860335  |
| Si | 4.14072036045905   | 2.27459937939375  | 1.12775235557303  |
| Si | 5.96672374959549   | 3.77665063924247  | 1.21418766581362  |
| Si | 6.03095350739717   | 6.15867143333407  | 1.30321176504561  |
| Si | 4.20298231792101   | 7.71541241682186  | 1.37881864672613  |
| Si | 1.93495982840491   | 7.00707780569773  | 1.36517796399549  |
| Si | 0.01905626608042   | 8.45234202386914  | 1.44043174486583  |
| Si | -1.89087188090742  | 6.99036112511197  | 1.36506934603721  |
| Si | -1.15049197233657  | 4.74902750648148  | 1.24180745900185  |
| Si | 1.18348200765249   | 4.76873708505422  | 1.25057377473175  |
| Si | 1.84670903674979   | 2.52532408958833  | 1.12261792471281  |
| Si | 0.04653564783181   | 0.95872260237186  | 0.98656197533953  |
| Si | -4.15761628052158  | 7.70212634704590  | 1.38381404666604  |
| Si | -11.51042036222130 | -1.54305346091861 | 1.02345734552041  |
| Si | -4.19225523903018  | -7.63717677384674 | 0.85811507527808  |
| Si | -2.01418108345622  | -6.89166350387529 | 1.31327479591883  |
| Si | -1.35750687765860  | -4.94254588375251 | 2.28095109352388  |
| Si | 0.97160936577890   | -4.63242861849939 | 2.48880261456962  |
| Si | 1.65913723545345   | -2.90987053551836 | 1.11954232052287  |
| Si | 3.78913853880835   | -2.08677103511133 | 0.90405917385064  |
| C  | -0.01456467827940  | -4.16396674359901 | 4.09974746818451  |
| O  | -1.12483594490947  | -4.92413769824227 | 4.07771586812194  |
| H  | -10.61466711115190 | 3.98735542893510  | -2.00181701613218 |
| H  | -10.05153563678859 | -4.29351590263718 | -2.28228171432621 |
| H  | -12.86405687294374 | 1.31193522039745  | -1.97386204496529 |
| H  | -6.98842943758767  | -6.28572100253442 | -2.34026525652710 |
| H  | -7.13365819512598  | 6.80382191365566  | -1.80966397608362 |
| H  | 0.10906085276238   | -8.57159499480677 | -2.35525777849872 |
| H  | 3.64680963641366   | -8.45199609622615 | -2.01337218376364 |
| H  | 6.85774448407764   | -6.66053813466826 | -2.02493518678533 |
| H  | 10.23116004499082  | -4.30051964327564 | -2.14734267657652 |
| H  | 12.79281479472354  | -1.92334337623054 | -1.89602862574734 |
| H  | 12.95721183959608  | 1.33446928089703  | -1.79271240802483 |
| H  | 10.71912941046615  | 3.98772198563664  | -1.90337371426249 |
| H  | 7.18403651462108   | 6.86606859158950  | -1.82495990793984 |
| H  | 4.54449787073027   | 9.06711445906173  | -1.77041730300422 |
| H  | 0.02004234929786   | 9.84613716227165  | -1.76641684485998 |
| H  | -4.52098558354067  | 9.03154240195878  | -1.77628782987793 |
| H  | -12.64830513968903 | -1.94798914967423 | -2.12214797043467 |
| H  | -3.87545441808231  | -8.28074456533350 | -2.53916318694634 |
| H  | -10.64112921517079 | 3.82893829699100  | 2.07171850189720  |
| H  | -10.12523782495779 | -4.43238540771866 | 1.81727735091348  |
| H  | -12.89031430785586 | 1.20873769870678  | 1.80569679339138  |
| H  | -7.10220529356289  | -6.44506950824970 | 1.68532124170472  |

|   |                    |                   |                  |
|---|--------------------|-------------------|------------------|
| H | -7.15489069022885  | 6.67921927839860  | 2.06955485010023 |
| H | -0.08190580280254  | -9.58090341673115 | 1.73047278231795 |
| H | 4.39711989398116   | -8.72621930590346 | 2.02099103389031 |
| H | 6.93562404823994   | -6.38190452606982 | 1.97019323192931 |
| H | 10.09542780942955  | -4.39316648053688 | 1.94469220865411 |
| H | 12.71043772729528  | -2.03720760416199 | 1.91012262886991 |
| H | 12.87540386343945  | 1.24262047746787  | 1.99199986371489 |
| H | 10.57883428602562  | 3.86003695047699  | 2.17232540972969 |
| H | 7.20298733082812   | 6.69353968635789  | 2.07076188970668 |
| H | 4.54481418542428   | 8.90487936710426  | 2.22401995962669 |
| H | 0.01391481556786   | 9.63025443962616  | 2.36585094240943 |
| H | -4.50319158813632  | 8.89472182377727  | 2.22286812114980 |
| H | -12.75008050456766 | -2.06335405746767 | 1.68895563284376 |
| H | -4.62811031240955  | -8.93193127197312 | 1.46972610654299 |
| H | 0.26395986689885   | -3.75146314384892 | 5.08438217826263 |
| H | -0.68428294405044  | -2.80323127869645 | 3.40319971755965 |

• **TS6 (Hck-CH<sub>2</sub>O → Hck-H-CH<sub>2</sub>OH)**

|    |                   |                   |                   |
|----|-------------------|-------------------|-------------------|
| Si | 27.33061457339752 | 2.22443687400618  | 2.38409538024454  |
| Si | 27.10267368769633 | -2.38277575629206 | 2.70625514351052  |
| Si | 29.60694763582233 | 2.75679405496552  | 2.67691359794586  |
| Si | 29.29721566051667 | -3.14582770042463 | 3.08545385941345  |
| Si | 31.10376067088423 | 0.93132447079865  | 3.03282487609882  |
| Si | 19.48867225394439 | -1.19490537899276 | 1.47018515750014  |
| Si | 21.42860431155968 | 2.65505654412122  | 1.45393325250815  |
| Si | 21.17548469270604 | -2.86469761998096 | 1.83519066543715  |
| Si | 23.69475361787161 | 2.25362938256814  | 1.81915643182937  |
| Si | 23.40174496599128 | -2.15863027275259 | 2.09639989097539  |
| Si | 25.52608108051011 | 3.76153622374049  | 1.97505956291728  |
| Si | 25.13377964881635 | -6.11679989822160 | 2.68523585571275  |
| Si | 24.32654681028172 | 0.01240842180388  | 2.10080254978909  |
| Si | 25.63626540090992 | 6.14568514300607  | 1.81273813550408  |
| Si | 25.13727660778913 | -3.73934891749681 | 2.49621746511296  |
| Si | 26.64903022291102 | -0.05943308525140 | 2.45348992305286  |
| Si | 19.32302560855845 | -8.10224845424952 | 1.92693980120913  |
| Si | 17.51137805210451 | -6.59356824701200 | 1.57119102033789  |
| Si | 15.28208182655454 | -7.37449954321660 | 1.36716097292021  |
| Si | 13.43830218167006 | -5.89833872718640 | 0.96830696821532  |
| Si | 13.58709536030940 | -3.53892775358273 | 0.75734545462126  |
| Si | 11.71515271821351 | -2.08668824922428 | 0.41736242690981  |
| Si | 9.46691143685092  | -2.73569191569816 | 0.15666366656491  |
| Si | 7.90772299969944  | -0.96140391367417 | -0.19282140472723 |
| Si | 7.96880373045869  | 1.43149593008289  | -0.35825009525766 |

|                      |                   |                   |
|----------------------|-------------------|-------------------|
| Si 9.59728109808712  | 3.17344949564038  | -0.25288507963062 |
| Si 11.83180600680911 | 2.51447129992306  | 0.09182244504467  |
| Si 12.34983743936940 | 0.20046212564030  | 0.32125932001463  |
| Si 14.68064408039743 | 0.15187934381491  | 0.63033530758706  |
| Si 15.48943560483637 | 2.35424351055094  | 0.60714523592754  |
| Si 13.75467039617827 | 3.94355370243754  | 0.23867881161730  |
| Si 13.75277444757564 | 6.32877319117349  | 0.06792730178151  |
| Si 15.58426170460663 | 7.88186477779050  | 0.21464937955078  |
| Si 17.82041217748624 | 7.18018854026646  | 0.59304177706874  |
| Si 19.74649479293118 | 8.60511285810912  | 0.76268735301634  |
| Si 21.59901451342048 | 7.12193758332931  | 1.14616807723667  |
| Si 20.80148393297638 | 4.90114927307618  | 1.19091976495595  |
| Si 18.48827898489247 | 4.92733555762493  | 0.84163979731917  |
| Si 17.77423183438804 | 2.68683247698213  | 0.91635220358601  |
| Si 19.57491347025269 | 1.17010173742973  | 1.28089886115526  |
| Si 23.87586260417840 | 7.74203165654808  | 1.43082447357856  |
| Si 30.98409083944232 | -1.45963599297863 | 3.19939818466323  |
| Si 23.20223681806193 | -7.52431092178154 | 2.47956859735220  |
| Si 21.10590016601539 | -6.51407336831366 | 2.02879941928850  |
| Si 20.44902821550338 | -4.60446147699338 | 3.21698573580714  |
| Si 18.36168590914376 | -4.54962926608344 | 2.25859046525953  |
| Si 17.62168514223987 | -2.59560141672512 | 1.48298855590952  |
| Si 15.44895522229206 | -2.06815206142012 | 0.91839818260625  |
| Si 27.69488221116876 | 2.04244012228126  | -0.01687115861982 |
| Si 27.47167538579128 | -2.56470404674264 | 0.30334736681595  |
| Si 29.96872764697150 | 2.57374089603725  | 0.29925136540976  |
| Si 29.66227125673135 | -3.32747163911226 | 0.70433541536364  |
| Si 31.46268391418979 | 0.75067671751410  | 0.68005591429904  |
| Si 19.82799393451742 | -1.34828229444618 | -0.88598672761591 |
| Si 21.78750011261451 | 2.48471508928244  | -0.94401617614676 |
| Si 21.56583183461554 | -2.94412491117252 | -0.55686613268621 |
| Si 24.05408495771544 | 2.08102196089883  | -0.57465397454783 |
| Si 23.79960087992793 | -2.33985513144532 | -0.29459616919586 |
| Si 25.88832056019680 | 3.58397008237013  | -0.39778730960747 |
| Si 25.52638740334327 | -6.31027273611633 | 0.31398113979508  |
| Si 24.68844357445205 | -0.15778833212821 | -0.27409367508452 |
| Si 25.99030536218224 | 5.96785939826885  | -0.56285221119295 |
| Si 25.51121153345340 | -3.93268929975118 | 0.13153389962599  |
| Si 27.01379090835478 | -0.24178381186591 | 0.06812685478876  |
| Si 19.64083974323241 | -8.34712750460462 | -0.42519288115010 |
| Si 17.79243728703689 | -6.88436000850657 | -0.81590347098059 |
| Si 15.56755881149164 | -7.64640420492011 | -1.00054008871131 |
| Si 13.76206180034263 | -6.11766476690090 | -1.40901748160512 |
| Si 13.89981547794808 | -3.74255436555068 | -1.61624998586454 |



|    |                   |                   |                   |
|----|-------------------|-------------------|-------------------|
| Si | 12.03246385834349 | -2.27466936228326 | -1.99231626655956 |
| Si | 9.77898006164584  | -2.91340023294200 | -2.23146309835772 |
| Si | 8.22265099258328  | -1.13146230221799 | -2.55385377389644 |
| Si | 8.28532576271550  | 1.26251644135821  | -2.71757530541878 |
| Si | 9.91036865415836  | 3.01126595548330  | -2.63948658440877 |
| Si | 12.14787108319384 | 2.34980624693062  | -2.31679367089656 |
| Si | 12.63860554085668 | 0.02905921147621  | -2.07585854111863 |
| Si | 14.96296836976160 | -0.00109290041183 | -1.75648435605749 |
| Si | 15.81940425851876 | 2.18334067190804  | -1.79428354869016 |
| Si | 14.07946005036179 | 3.77379296157277  | -2.14089580375460 |
| Si | 14.08998128668135 | 6.15866650870901  | -2.31145247315060 |
| Si | 15.92631719969933 | 7.70796347482299  | -2.16237808636430 |
| Si | 18.16661142173577 | 7.00724252781897  | -1.79691792207051 |
| Si | 20.09313512977847 | 8.43327789979370  | -1.61561833497888 |
| Si | 21.94703365434178 | 6.94819598460532  | -1.24255953675040 |
| Si | 21.14653173850865 | 4.72769146770267  | -1.19396832794155 |
| Si | 18.83094752445284 | 4.75256232668235  | -1.53980384347152 |
| Si | 18.11179825756964 | 2.51169127198229  | -1.48682683032137 |
| Si | 19.92494412287774 | 1.00942428073395  | -1.11688604791418 |
| Si | 24.22572859572107 | 7.56214481365216  | -0.94518449596628 |
| Si | 31.34542161064428 | -1.64024045125473 | 0.84576475969028  |
| Si | 23.63168316196563 | -7.76861323441083 | 0.13152097780460  |
| Si | 21.50621432179875 | -6.86601610984173 | -0.33872960952548 |
| Si | 21.00534888651930 | -4.95696717961219 | -1.52375156923474 |
| Si | 18.67888331347480 | -4.91377367169593 | -1.60822588704239 |
| Si | 17.99324156990152 | -2.69757508192543 | -1.54565718510750 |
| Si | 15.71976186527648 | -2.20903764025397 | -1.47019421465476 |
| C  | 20.56780047061981 | -4.96498766062301 | -3.44020901028369 |
| O  | 19.08898611250543 | -4.85055670538962 | -3.42179094684350 |
| H  | 29.95809488547913 | 3.97003228451432  | 3.48145257665517  |
| H  | 29.52197047713466 | -4.26968474574902 | 4.04919367517579  |
| H  | 32.25101134256697 | 1.37588971341690  | 3.89185649049187  |
| H  | 26.12826572036606 | -6.66710125757063 | 3.66370443524033  |
| H  | 26.69793526224446 | 6.76490886687380  | 2.67259857662608  |
| H  | 19.19507242126084 | -9.20201144911783 | 2.93145960022093  |
| H  | 14.91750587960330 | -8.51152809067903 | 2.27066084450155  |
| H  | 12.18821243307512 | -6.40577137399298 | 1.62212168888025  |
| H  | 8.93006427647868  | -3.84116668290330 | 1.01203218760360  |
| H  | 6.57111250774867  | -1.33652850449464 | 0.37614229979916  |
| H  | 6.64900731227812  | 1.94036392731509  | 0.14245515919553  |
| H  | 9.10293069187499  | 4.40399473105987  | 0.44229930789805  |
| H  | 12.50098365691561 | 6.96746393631049  | 0.59238060318777  |
| H  | 15.14448719495492 | 9.16024343386311  | 0.86134408271948  |
| H  | 19.65349694894348 | 9.89072967448497  | 1.52532064720690  |

|   |                   |                   |                   |
|---|-------------------|-------------------|-------------------|
| H | 24.14615433114808 | 9.01618943376620  | 2.17230017786959  |
| H | 32.08382955592784 | -1.89425625750973 | 4.12316122127924  |
| H | 23.24611380504417 | -8.67883854409428 | 3.43315233990328  |
| H | 30.56925141711181 | 3.65982290271377  | -0.53881581205077 |
| H | 30.13151415861710 | -4.57716118654562 | 0.02551430321464  |
| H | 32.82217716918215 | 1.09010707187161  | 0.14303070649636  |
| H | 26.76255175819770 | -6.97066438010323 | -0.22155054845584 |
| H | 27.26515874165209 | 6.48464262549683  | -1.16108668298743 |
| H | 19.71609561399346 | -9.61722057569132 | -1.21166669396680 |
| H | 15.39033683099419 | -8.95537570089659 | -1.70510399124486 |
| H | 12.72498440564180 | -6.76285404655189 | -2.27928017167591 |
| H | 9.45107246869940  | -4.13972804625358 | -3.02566592990735 |
| H | 7.07233140030802  | -1.60211058974849 | -3.39436371869596 |
| H | 7.15058569607655  | 1.66584688135038  | -3.61279778010123 |
| H | 9.61977987601279  | 4.12588197245032  | -3.59617066938169 |
| H | 13.04819825949807 | 6.70151361280636  | -3.24434143872931 |
| H | 15.70807648692742 | 8.87056807845977  | -3.08263870802668 |
| H | 20.24546344141192 | 9.59504046877567  | -2.54850744505681 |
| H | 24.73074756577699 | 8.71694839157178  | -1.75637845447268 |
| H | 32.65930139229142 | -2.18399693409740 | 0.36626499918099  |
| H | 23.95968727818694 | -9.07506621387959 | -0.52334680987692 |
| H | 18.30331227429042 | -2.72167217132103 | -3.33778237819542 |
| H | 20.82103740547079 | -5.90323938972236 | -3.96130995762064 |
| H | 20.97583341281008 | -4.11378098914326 | -4.01253173237323 |
| H | 18.68469261419783 | -3.64178984067246 | -3.53762870937267 |

- **TS7 (Hck-H-CH<sub>2</sub>OH → Hck-CH<sub>3</sub>OH)**

|    |                   |                   |                   |
|----|-------------------|-------------------|-------------------|
| C  | 20.04909714462925 | -5.26115953154477 | -3.20631147939818 |
| H  | 19.35645438935199 | -4.07909784695346 | -2.86189972549838 |
| H  | 20.05394058823567 | -4.79751569505491 | -4.21658925416828 |
| Si | 27.33150032123711 | 2.22717074029488  | 2.38429095763361  |
| Si | 27.05988369417440 | -2.38944742383471 | 2.55954906823172  |
| Si | 29.60847169295587 | 2.73003319037311  | 2.71983934933299  |
| Si | 29.24072325956382 | -3.18969137772956 | 2.93897810678625  |
| Si | 31.08031259686432 | 0.87644143751287  | 3.02884888224081  |
| Si | 19.38059224675257 | -1.21401022524407 | 1.22660687681929  |
| Si | 21.41600911058071 | 2.62862980680635  | 1.44787835674275  |
| Si | 21.12437096198194 | -2.77091906028289 | 1.64036091364713  |
| Si | 23.69281698305036 | 2.28659636648788  | 1.80118649597727  |
| Si | 23.35498502904984 | -2.10289535067716 | 1.89859726485105  |
| Si | 25.53364853604173 | 3.77819655277360  | 2.01549156861971  |
| Si | 25.09187796603926 | -6.07540347673206 | 2.46635139232303  |
| Si | 24.32067243176594 | 0.04450284984948  | 2.02272616679232  |

|                      |                   |                   |
|----------------------|-------------------|-------------------|
| Si 25.63964282144385 | 6.16586572120567  | 1.92455779062710  |
| Si 25.07541032201484 | -3.70188261351717 | 2.28254512460015  |
| Si 26.64069822348752 | -0.05613222403035 | 2.37177642618935  |
| Si 19.24047904407052 | -8.08800748912830 | 2.05369486956934  |
| Si 17.36476407772153 | -6.64192047584955 | 2.13718698401727  |
| Si 15.17170557309755 | -7.31318800096877 | 1.52212250339085  |
| Si 13.44418258592010 | -5.74351835408917 | 0.97519047386732  |
| Si 13.70881413448937 | -3.42921100761445 | 0.64276854722838  |
| Si 11.78769766607896 | -2.06915826126172 | 0.29666279362438  |
| Si 9.56322598151683  | -2.79672051575398 | 0.05275794218889  |
| Si 7.97095026250873  | -1.04759745735641 | -0.27366553691151 |
| Si 8.00694568348246  | 1.34761571919982  | -0.40978760893139 |
| Si 9.61064180260745  | 3.11070006706052  | -0.28768231230369 |
| Si 11.86330330513644 | 2.49878790444342  | 0.03396782630648  |
| Si 12.43011996834509 | 0.20011791604779  | 0.23282182525945  |
| Si 14.75673412838001 | 0.12370467314572  | 0.58918508255466  |
| Si 15.50455981119131 | 2.33937877720417  | 0.54276105124157  |
| Si 13.77505115040882 | 3.93111960519998  | 0.21198311848790  |
| Si 13.78395092425387 | 6.31934878825407  | 0.09298287060271  |
| Si 15.59105751399217 | 7.89338403789932  | 0.28961203676232  |
| Si 17.83025629390555 | 7.20350103222355  | 0.68260032454750  |
| Si 19.76013189718916 | 8.61684639944106  | 0.90358137525429  |
| Si 21.60115005036190 | 7.11413925970372  | 1.26824391510812  |
| Si 20.80299633365573 | 4.89022525509999  | 1.25623215209471  |
| Si 18.49528447910564 | 4.94614694733835  | 0.87994219252751  |
| Si 17.76622610928394 | 2.71347965356977  | 0.88551741685887  |
| Si 19.53883654176749 | 1.16024477068788  | 1.23279844568618  |
| Si 23.86772953568156 | 7.75718698790931  | 1.57550705156120  |
| Si 30.93685812538978 | -1.51745332883644 | 3.11941764551996  |
| Si 23.17486585838851 | -7.51041649442651 | 2.30719381781570  |
| Si 21.03422788398022 | -6.49391449572405 | 2.16230741615567  |
| Si 20.58264145997603 | -4.45207199139185 | 3.23432142067266  |
| Si 18.37618307568923 | -4.62352442450296 | 2.69065533829517  |
| Si 17.67880560912596 | -2.78919573731310 | 1.50338589735346  |
| Si 15.62284792021407 | -2.07095926801780 | 0.72461512823605  |
| Si 27.71966478266088 | 2.12447991469499  | -0.01769381672266 |
| Si 27.45550299901916 | -2.50441632347291 | 0.15796601245305  |
| Si 29.99347638136249 | 2.62626949786624  | 0.34139648170671  |
| Si 29.63216945723983 | -3.30499009793317 | 0.55757603797588  |
| Si 31.45623622885164 | 0.76760076050193  | 0.67475137091071  |
| Si 19.59939035404302 | -1.23933261287637 | -1.18157107512656 |
| Si 21.79350335678308 | 2.52246788932405  | -0.95591313752582 |
| Si 21.51507203082882 | -2.60892862805000 | -0.82862487744592 |
| Si 24.07186722652232 | 2.17939725649831  | -0.59062453907319 |

|    |                   |                   |                   |
|----|-------------------|-------------------|-------------------|
| Si | 23.78790106157469 | -2.21231626317360 | -0.48809094162285 |
| Si | 25.91086936086900 | 3.67293748207143  | -0.35946356333894 |
| Si | 25.45093522987820 | -6.21832911729141 | 0.08617115733723  |
| Si | 24.73129513823144 | -0.05409045590634 | -0.35154021238482 |
| Si | 26.01191863429085 | 6.05947438560054  | -0.45236973527703 |
| Si | 25.47943059203150 | -3.84450395910623 | -0.07740978387149 |
| Si | 27.05193803869293 | -0.16601412987553 | -0.00880404403418 |
| Si | 19.42355921469358 | -7.92602924532415 | -0.31702493930226 |
| Si | 17.70058450737548 | -6.29597540416855 | -0.26026399588808 |
| Si | 15.67794113302512 | -7.35501098566627 | -0.82126120713889 |
| Si | 13.79271826350918 | -6.02048378377058 | -1.39160874462556 |
| Si | 14.02454681746343 | -3.66139591864184 | -1.72563493076706 |
| Si | 12.10847683263324 | -2.25423285138928 | -2.11020211541053 |
| Si | 9.87037750231533  | -2.94771361222207 | -2.34052246888226 |
| Si | 8.28563615826844  | -1.18597334275154 | -2.63633080569145 |
| Si | 8.32330200671767  | 1.21118522786318  | -2.77082595921367 |
| Si | 9.91710182824771  | 2.98933353254471  | -2.67671043584034 |
| Si | 12.17334807019667 | 2.37506201955525  | -2.37696081928342 |
| Si | 12.67935689007384 | 0.05567430132323  | -2.16677980790342 |
| Si | 14.99738079874394 | -0.02410287770087 | -1.80119740357544 |
| Si | 15.82900244931162 | 2.18097364063208  | -1.85232688101830 |
| Si | 14.10747144994482 | 3.79929904011079  | -2.17150515004322 |
| Si | 14.14117001536995 | 6.19454455711303  | -2.28705124997195 |
| Si | 15.95543719686767 | 7.76689884185187  | -2.08732545695691 |
| Si | 18.19782503426924 | 7.08090785020847  | -1.70985145360881 |
| Si | 20.12604931262282 | 8.49687950617635  | -1.47672092126080 |
| Si | 21.96561159122118 | 6.99307655802365  | -1.12178970049738 |
| Si | 21.15606662963245 | 4.77320588363063  | -1.12725153939614 |
| Si | 18.84282075985617 | 4.81978875438658  | -1.49988913129851 |
| Si | 18.10683666723319 | 2.58735813922015  | -1.51863994956005 |
| Si | 19.91215866107537 | 1.08528042449797  | -1.16257944479703 |
| Si | 24.23098822966383 | 7.64014116429139  | -0.80238549951103 |
| Si | 31.31868531994525 | -1.62734552610954 | 0.76483050072060  |
| Si | 23.46290783148579 | -7.52918827064720 | -0.08117722801653 |
| Si | 21.32770312117500 | -6.55202710542658 | -0.21839453942655 |
| Si | 20.50734713142911 | -4.60506500973091 | -1.13188390895919 |
| Si | 18.28908144621800 | -4.04847083753363 | -0.47394792693722 |
| Si | 18.13282019101817 | -2.68206562730960 | -2.41314337264636 |
| Si | 15.94197753022335 | -2.19987691511540 | -1.68669281831651 |
| O  | 19.04084789372943 | -6.23700597184100 | -3.03284385520582 |
| H  | 29.95850256171528 | 3.91092065754159  | 3.57136746771525  |
| H  | 29.44638757104505 | -4.34164571847968 | 3.87341855042578  |
| H  | 32.22679047400375 | 1.28045704829655  | 3.90869895332302  |
| H  | 26.11317785422060 | -6.60320543874294 | 3.42892939341007  |

|   |                   |                   |                   |
|---|-------------------|-------------------|-------------------|
| H | 26.68991105935835 | 6.76327719752422  | 2.81327284804860  |
| H | 19.31055780495958 | -9.32049865877517 | 2.89809947949301  |
| H | 14.59223938294564 | -8.47869098538285 | 2.26582275358117  |
| H | 12.15231447248571 | -6.10296532143132 | 1.64508668744366  |
| H | 9.06260260539059  | -3.91884490206077 | 0.90895160618821  |
| H | 6.64098333901581  | -1.44769172427718 | 0.29409314642928  |
| H | 6.68154236903342  | 1.83656585765808  | 0.09656239513614  |
| H | 9.10257704951667  | 4.32466157394337  | 0.42685787968599  |
| H | 12.52100111047479 | 6.93862470884470  | 0.61464783165489  |
| H | 15.12731690532577 | 9.15291891078079  | 0.95635620882351  |
| H | 19.67180789483407 | 9.88500094681922  | 1.69584265331937  |
| H | 24.12720091857392 | 9.01100558040928  | 2.35457809541374  |
| H | 32.02557457908116 | -1.99126763829269 | 4.03696027121769  |
| H | 23.36196481434904 | -8.74430629550589 | 3.13653120874439  |
| H | 30.61987059545004 | 3.73119775073297  | -0.45174612063945 |
| H | 30.10161857301490 | -4.53687012853233 | -0.15293283448023 |
| H | 32.82560495010094 | 1.10591938218353  | 0.16258389526741  |
| H | 26.62488253469174 | -6.94730412324852 | -0.49701502574195 |
| H | 27.28743888511395 | 6.59872476396085  | -1.02876926470124 |
| H | 19.25515886880678 | -9.02239764201990 | -1.32459828116286 |
| H | 15.88802481941005 | -8.62300464071160 | -1.59117082594098 |
| H | 12.82311809266896 | -6.75822798463258 | -2.26586351590554 |
| H | 9.55072616674772  | -4.17164693282372 | -3.14235725422356 |
| H | 7.13902667601586  | -1.65662789613649 | -3.48209481337159 |
| H | 7.17923814693749  | 1.60931806938288  | -3.65690801707487 |
| H | 9.58967213270467  | 4.11180857113065  | -3.61238145245897 |
| H | 13.10542168611037 | 6.76535066195355  | -3.21066652635522 |
| H | 15.73504612252068 | 8.94452190454724  | -2.98781370000331 |
| H | 20.29864761545271 | 9.67789653933320  | -2.38154434154457 |
| H | 24.72073490174682 | 8.81955008773131  | -1.58703500254822 |
| H | 32.63551632223604 | -2.16139747912439 | 0.28244370933015  |
| H | 23.61208812705729 | -8.78214809146249 | -0.88862113636689 |
| H | 21.08329624901227 | -5.67416584338426 | -3.09649626350720 |
| H | 19.17429530325672 | -6.96623985459718 | -3.66569711934647 |

- **TS8 (Hck-CH<sub>3</sub>OH → Hck-H-H-CH<sub>3</sub>OH)**

|    |                   |                   |                   |
|----|-------------------|-------------------|-------------------|
| C  | 20.68180892678644 | -1.25535928157066 | -5.20635778272478 |
| H  | 21.47806363671461 | -1.73393606946644 | -4.60851684297738 |
| Si | 27.26569258301226 | 2.10412121628384  | 2.27887967483531  |
| Si | 26.97781730417211 | -2.45928378812145 | 2.63742045416963  |
| Si | 29.55158171423260 | 2.56879007090666  | 2.61979671151216  |
| Si | 29.12041575364475 | -3.32552646918159 | 3.06451919690952  |
| Si | 30.99867420127538 | 0.70934063420227  | 3.00777475938446  |

|    |                   |                   |                   |
|----|-------------------|-------------------|-------------------|
| Si | 19.56364432036428 | -1.38652329432497 | 1.19967446315394  |
| Si | 21.40208009579070 | 2.51948187963908  | 1.28771594220438  |
| Si | 21.02979526983660 | -3.02544381188538 | 2.04713753237561  |
| Si | 23.65438846131318 | 2.13888889540752  | 1.67061153371691  |
| Si | 23.18873074335094 | -2.22511996165289 | 1.93134584952323  |
| Si | 25.47666557913927 | 3.64623089224768  | 1.84785004040758  |
| Si | 25.04411407497639 | -6.01393707361746 | 2.82939155345841  |
| Si | 24.22636757934725 | -0.10673233680916 | 1.95099832865312  |
| Si | 25.58897878728004 | 6.02792477172507  | 1.68434058341773  |
| Si | 24.95694484285369 | -3.69304937855643 | 2.41702544882323  |
| Si | 26.54505013978161 | -0.15945449973406 | 2.34775465593984  |
| Si | 19.20750531055538 | -8.12401401150043 | 2.36719033212676  |
| Si | 17.35381983834320 | -6.63698787774164 | 2.22237122368133  |
| Si | 15.19094571862925 | -7.37078193893664 | 1.58114488824090  |
| Si | 13.48073344919513 | -5.79321383107406 | 1.01170416209386  |
| Si | 13.75851622086987 | -3.47874309822101 | 0.65326624855602  |
| Si | 11.81319229114977 | -2.14837488924582 | 0.32023345587565  |
| Si | 9.60064066158436  | -2.91700173784309 | 0.10798391244651  |
| Si | 7.98892343530938  | -1.18615117599944 | -0.22254960797495 |
| Si | 7.99061660221700  | 1.20787627686064  | -0.38872528017943 |
| Si | 9.55844567428150  | 3.00683586573299  | -0.31468342222029 |
| Si | 11.82641890693753 | 2.43778087047520  | -0.02288327349276 |
| Si | 12.39808665766871 | 0.13933759335546  | 0.21462299867616  |
| Si | 14.72294854874056 | 0.11196317594035  | 0.56875665142272  |
| Si | 15.48565053790063 | 2.31552892517986  | 0.43287159665853  |
| Si | 13.73017362878474 | 3.88583479195142  | 0.10368405588448  |
| Si | 13.72124360672053 | 6.26903076074565  | -0.05811716456788 |
| Si | 15.57412670442921 | 7.78827091511618  | 0.09779708495208  |
| Si | 17.79078144984894 | 7.02830497690753  | 0.47579095177857  |
| Si | 19.70336784507141 | 8.46967915162575  | 0.66509189396364  |
| Si | 21.57056350168567 | 7.00491610660841  | 1.04233809498809  |
| Si | 20.79170167511927 | 4.77466508502694  | 1.06275632889598  |
| Si | 18.48421593073807 | 4.78106588170959  | 0.70379663773867  |
| Si | 17.77437191318318 | 2.54046885217083  | 0.73547442194349  |
| Si | 19.57092361621465 | 0.99637731784472  | 1.06323099432788  |
| Si | 23.84512752386262 | 7.64106886528878  | 1.31306315566558  |
| Si | 30.84425267468243 | -1.67879785156885 | 3.18931856953081  |
| Si | 23.16394609119776 | -7.50549017943748 | 2.86508412731071  |
| Si | 20.98331137483486 | -6.57965628885264 | 2.75846648825991  |
| Si | 20.30868676770832 | -4.51741070768389 | 3.71628281999571  |
| Si | 18.19303251658667 | -4.57385191971323 | 2.92597190667581  |
| Si | 17.70390535757423 | -2.81798771362956 | 1.48767683187576  |
| Si | 15.64951654047587 | -2.06750730120825 | 0.71415806792285  |
| Si | 27.67033962035637 | 1.90562272502779  | -0.11161392766184 |

|    |                   |                   |                   |
|----|-------------------|-------------------|-------------------|
| Si | 27.35737239985916 | -2.70049304992083 | 0.23990832283946  |
| Si | 29.95294460508137 | 2.37401426257361  | 0.25036502966949  |
| Si | 29.51141510328313 | -3.53878122613121 | 0.68773479477606  |
| Si | 31.38513976371424 | 0.50666822276451  | 0.66195559178816  |
| Si | 20.13171053375777 | -1.41895037289732 | -1.16374017250325 |
| Si | 21.80162412518910 | 2.38021494083959  | -1.10117512213514 |
| Si | 21.75518112972178 | -2.98908936606754 | -1.95713257306100 |
| Si | 24.05208353172872 | 1.92115846520655  | -0.70813987925947 |
| Si | 23.53022793852572 | -2.42853184654725 | -0.47738516609989 |
| Si | 25.86590249811287 | 3.45213625839302  | -0.52262321732081 |
| Si | 25.40410762672464 | -6.31719989849171 | 0.46690690393044  |
| Si | 24.64946265148001 | -0.33375644657895 | -0.40645970803197 |
| Si | 25.94106577074932 | 5.84392331600492  | -0.69100014619716 |
| Si | 25.31945688508610 | -3.96200130172317 | 0.05753670456799  |
| Si | 26.96870392927694 | -0.37260825524359 | -0.02263141946756 |
| Si | 19.58453892432586 | -7.90694678306588 | 0.01719272962599  |
| Si | 17.76609061386949 | -6.40918907946615 | -0.14839338983073 |
| Si | 15.73107556699884 | -7.41925125842533 | -0.75863503003843 |
| Si | 13.84009808426243 | -6.10504373853867 | -1.35129879847860 |
| Si | 14.02763723783225 | -3.75343418537000 | -1.71230170284371 |
| Si | 12.10493618238733 | -2.35644686444166 | -2.08786216947655 |
| Si | 9.88071537837371  | -3.09622291206278 | -2.28785080274774 |
| Si | 8.27776429737762  | -1.34948895576048 | -2.58739799199478 |
| Si | 8.27213614717715  | 1.04648097026722  | -2.75230187240420 |
| Si | 9.82589151196001  | 2.86143663523999  | -2.70758746760439 |
| Si | 12.09482677146919 | 2.28601589458212  | -2.43629479811453 |
| Si | 12.59480992848824 | -0.02926012010362 | -2.18673873878846 |
| Si | 14.90871404796965 | -0.02840732460938 | -1.82592075527655 |
| Si | 15.78403996815252 | 2.14136596398337  | -1.96116652535365 |
| Si | 14.02458888968320 | 3.71827478600574  | -2.28344031819803 |
| Si | 14.05151007471885 | 6.10497827738657  | -2.43943956411831 |
| Si | 15.91489707431840 | 7.62016768000182  | -2.28080106596020 |
| Si | 18.14177755547868 | 6.87797200054225  | -1.91729023742914 |
| Si | 20.05365914851709 | 8.31849314826159  | -1.71662511880411 |
| Si | 21.91414052526154 | 6.84287157041286  | -1.35062287448510 |
| Si | 21.14054882042617 | 4.61562035194648  | -1.31514175594078 |
| Si | 18.82389946445427 | 4.62713319295054  | -1.67586441601882 |
| Si | 18.09116434469137 | 2.39281647111020  | -1.66921265330334 |
| Si | 19.94679919669462 | 0.92841252299872  | -1.33371976960491 |
| Si | 24.19083479382559 | 7.45999957926365  | -1.06313526477352 |
| Si | 31.22553130894471 | -1.88265554444348 | 0.84118823755210  |
| Si | 23.38381962047862 | -7.56695919907053 | 0.46868117607037  |
| Si | 21.35448877502346 | -6.38782375257692 | 0.39224181498021  |
| Si | 20.91204555838168 | -4.16075113492646 | -0.08454213484037 |

|    |                   |                   |                   |
|----|-------------------|-------------------|-------------------|
| Si | 18.54674336427433 | -4.23658040042845 | -0.28814392971636 |
| Si | 18.15616986479165 | -2.54827865546515 | -1.83278412938703 |
| Si | 15.85403914575295 | -2.18387898608633 | -1.70360950594002 |
| O  | 19.46353654253897 | -1.13015235461410 | -4.43749812414805 |
| H  | 29.91458532838903 | 3.77499668527492  | 3.43000805380289  |
| H  | 29.28193628961825 | -4.44349294593265 | 4.04796861777672  |
| H  | 32.14503015680421 | 1.14312477835699  | 3.87404841548751  |
| H  | 26.07960008559200 | -6.38787293605583 | 3.84775320289749  |
| H  | 26.65897917887549 | 6.63552500579563  | 2.54239824936121  |
| H  | 19.07928343596483 | -9.39666824469531 | 3.14186580288297  |
| H  | 14.58312885103179 | -8.53233802352508 | 2.30698006987045  |
| H  | 12.17020400861816 | -6.11865881177994 | 1.66213870499915  |
| H  | 9.12466213787970  | -4.03418890416523 | 0.98386091135459  |
| H  | 6.66882796275820  | -1.59275776821034 | 0.36281897547726  |
| H  | 6.66388876302572  | 1.68088878078485  | 0.12857032024371  |
| H  | 9.03541046012687  | 4.21741278206255  | 0.39424174440237  |
| H  | 12.47404222306160 | 6.90410943889854  | 0.48052630817513  |
| H  | 15.16072977440976 | 9.07017973067308  | 0.75455488181784  |
| H  | 19.58202202197673 | 9.74834367208604  | 1.43577398423872  |
| H  | 24.11807589225466 | 8.91182416248265  | 2.05908764200530  |
| H  | 31.92564063509124 | -2.12566534823443 | 4.12882880416496  |
| H  | 23.47923528554324 | -8.67385713792943 | 3.75167268189278  |
| H  | 30.60777322812812 | 3.44081012183155  | -0.57201859659618 |
| H  | 29.97233713614154 | -4.80416659846828 | 0.03201787237601  |
| H  | 32.76302897793028 | 0.81056310192030  | 0.15015689500881  |
| H  | 26.56802608540551 | -7.09038563526769 | -0.07855708405476 |
| H  | 27.21343590138001 | 6.37268701493101  | -1.28541897126654 |
| H  | 19.71044718495320 | -9.00669104466560 | -0.99027165336781 |
| H  | 15.93526722348810 | -8.67953653706471 | -1.54019324143173 |
| H  | 12.88243196570461 | -6.85599984218680 | -2.22690049192239 |
| H  | 9.56972237644466  | -4.33240046460787 | -3.07340464970651 |
| H  | 7.12743698499352  | -1.84790714875303 | -3.41165981733167 |
| H  | 7.10473530059378  | 1.40782048194103  | -3.62324448776128 |
| H  | 9.46459845791363  | 3.96493519948090  | -3.65269979059534 |
| H  | 13.02163111667898 | 6.66985693720718  | -3.37233423983981 |
| H  | 15.71639031891710 | 8.78871715814302  | -3.19802745815537 |
| H  | 20.20010396415486 | 9.48649969371593  | -2.64275111349994 |
| H  | 24.69570753409354 | 8.61130807059619  | -1.87937493304627 |
| H  | 32.53729460105134 | -2.44619152451535 | 0.37872666607755  |
| H  | 23.33992929752957 | -8.83105295319791 | -0.33366803169125 |
| H  | 20.43767809085655 | -1.88191207314176 | -6.07654306051659 |
| H  | 20.99908715072094 | -0.25646549554349 | -5.54949171449926 |
| H  | 18.92730326036368 | -2.38747581451323 | -3.83583640593765 |
| H  | 18.56492008329730 | -3.14651494687901 | -3.49673242844614 |



H 19.63971966069318 -0.57072717493100 -3.64190993892481

• **TS9 (Hck-H-H-CH<sub>3</sub>OH → Hck-H-CH<sub>3</sub>-H<sub>2</sub>O)**

|    |                   |                   |                   |
|----|-------------------|-------------------|-------------------|
| C  | 21.64921887424387 | -5.86119399564514 | -2.74094530272491 |
| H  | 22.28364406753719 | -5.61052446100333 | -3.61117622481655 |
| H  | 22.31479400945860 | -6.19048940201549 | -1.92701620415086 |
| H  | 20.98202955106888 | -6.69281845163259 | -3.02091955254817 |
| Si | 27.22952116529551 | 2.29247324552422  | 2.41801728539811  |
| Si | 27.08316851643318 | -2.25994904788834 | 2.55320168273434  |
| Si | 29.49033053311263 | 2.81539333827938  | 2.82573394822489  |
| Si | 29.23814963142135 | -3.09251266028100 | 2.98678415175930  |
| Si | 30.99583727086781 | 0.99250573574843  | 3.15987463940823  |
| Si | 19.71566114262123 | -1.32309053093083 | 0.66920448382278  |
| Si | 21.40879137290385 | 2.63979209212676  | 1.27006368446647  |
| Si | 21.10756214064302 | -2.96455256255981 | 1.65761828121037  |
| Si | 23.64590870136413 | 2.26229141216093  | 1.69611564925145  |
| Si | 23.26185419832397 | -2.15949193119586 | 1.75457631094232  |
| Si | 25.41507234909315 | 3.80145802531949  | 2.01270886097122  |
| Si | 25.14759527738159 | -5.81925908426290 | 2.72958310569852  |
| Si | 24.22851707520529 | 0.01563976823615  | 1.90087034807446  |
| Si | 25.55891613456499 | 6.18325320388289  | 2.00121005575440  |
| Si | 25.10156486346867 | -3.52429605491240 | 2.23330311386305  |
| Si | 26.53868001636904 | 0.02130468614277  | 2.37438399727859  |
| Si | 19.15626014579264 | -7.65105705850965 | 2.01913119524492  |
| Si | 17.34016649584792 | -6.11276802203678 | 1.66296480825135  |
| Si | 15.32556954351850 | -7.21976052974029 | 1.04608720261809  |
| Si | 13.57977436353734 | -5.68303191842505 | 0.51812414302626  |
| Si | 14.01629390927630 | -3.38053020737878 | 0.29194854383159  |
| Si | 12.03888432587697 | -2.07284665539061 | 0.15439333746884  |
| Si | 9.82918957354536  | -2.86338839921115 | 0.01169764090996  |
| Si | 8.17392442691992  | -1.14336850168774 | -0.09250805416732 |
| Si | 8.12375218865894  | 1.25550730820883  | -0.07126812805822 |
| Si | 9.67196314682176  | 3.06422776882756  | 0.07192653932954  |
| Si | 11.95739595002203 | 2.50843826636488  | 0.19159102319078  |
| Si | 12.58764665208350 | 0.21432163712512  | 0.20256641526812  |
| Si | 14.93269402341451 | 0.18241441408655  | 0.38873966262601  |
| Si | 15.59125197640313 | 2.41855528167622  | 0.47783417244841  |
| Si | 13.82309921302528 | 3.99402576492018  | 0.35766170221811  |
| Si | 13.74835432419840 | 6.37947016655154  | 0.40680520532185  |
| Si | 15.55695062389968 | 7.93699400490111  | 0.65174355859792  |
| Si | 17.78410217097703 | 7.17790791523795  | 0.94078714747991  |
| Si | 19.68449228423067 | 8.61602281833019  | 1.21563275620811  |
| Si | 21.56002659417803 | 7.13392960565864  | 1.43073549668544  |

|                      |                   |                   |
|----------------------|-------------------|-------------------|
| Si 20.79982717106149 | 4.90479383344360  | 1.24593243929976  |
| Si 18.48416638250803 | 4.91879907468879  | 0.96085091929447  |
| Si 17.86552647738993 | 2.65831305649432  | 0.78428227021584  |
| Si 19.65420667775883 | 1.06721521923699  | 0.93056145891501  |
| Si 23.81605206177653 | 7.80578330360391  | 1.73564716462624  |
| Si 30.91089031167981 | -1.40448071421274 | 3.22616903304797  |
| Si 23.13592292296945 | -7.10341152363196 | 2.81782557190443  |
| Si 20.89469385828521 | -6.35257138184508 | 2.98340349155847  |
| Si 19.85710148455594 | -4.29919978986835 | 3.13026138300870  |
| Si 17.57310554662462 | -4.06636598920140 | 2.85139379378303  |
| Si 17.98270266269112 | -2.84931404292124 | 0.86816860399293  |
| Si 15.90846756539665 | -1.97198330833131 | 0.27662511802725  |
| Si 27.68013704009693 | 2.21942853042225  | 0.03041923672072  |
| Si 27.51231386811025 | -2.38088145483966 | 0.16709654721064  |
| Si 29.94058289052164 | 2.73818566778833  | 0.45634790034904  |
| Si 29.68374242352750 | -3.17583208201349 | 0.60883434644289  |
| Si 31.43726506313412 | 0.91220072662144  | 0.81563925189515  |
| Si 19.90249788278949 | -1.07602236788425 | -1.70628639314605 |
| Si 21.81843343806852 | 2.70128437498006  | -1.11984658779460 |
| Si 21.89920699845686 | -2.29357029395647 | -2.15120119441140 |
| Si 24.05971397989241 | 2.19015445021247  | -0.68760545168613 |
| Si 23.70014747594742 | -2.22315084542502 | -0.61801927654815 |
| Si 25.84469204846615 | 3.73688042263599  | -0.35909409988660 |
| Si 25.32244640617596 | -6.03277742866186 | 0.33016333727900  |
| Si 24.69212234871523 | -0.07095317922037 | -0.44622547460494 |
| Si 25.90487668248764 | 6.14035711048946  | -0.38455679261351 |
| Si 25.53969362571580 | -3.72188092614601 | -0.12320937873536 |
| Si 26.99981310793928 | -0.06669912134107 | 0.00407152052893  |
| Si 19.65570780336240 | -7.03114684644878 | -0.18288979230189 |
| Si 17.67965211878108 | -5.93633132983016 | -0.73525804955342 |
| Si 15.80465997180002 | -7.19886157444186 | -1.31379167560122 |
| Si 13.90117274114346 | -5.86439534687463 | -1.86196514717985 |
| Si 14.15184928899525 | -3.48528501262790 | -2.10332519715831 |
| Si 12.19156026986396 | -2.09371009443685 | -2.27522790054275 |
| Si 9.96924978941551  | -2.85299983931533 | -2.40267825469139 |
| Si 8.33257227329590  | -1.11686973361107 | -2.47453911808783 |
| Si 8.29886101477507  | 1.28528048192967  | -2.45076795453121 |
| Si 9.82359664605311  | 3.12577868343176  | -2.33508402073832 |
| Si 12.11416509076820 | 2.57660538586306  | -2.23387584468142 |
| Si 12.64499068586023 | 0.25149291238100  | -2.21316504369402 |
| Si 14.97904535753672 | 0.24875293796975  | -2.01886695963378 |
| Si 15.81051572982862 | 2.44488701823356  | -1.93499225738545 |
| Si 14.03207787913634 | 4.03664562364188  | -2.04268808602144 |
| Si 14.01892740630092 | 6.42821395562769  | -1.98597371926634 |

|    |                   |                   |                   |
|----|-------------------|-------------------|-------------------|
| Si | 15.86114686101240 | 7.96057144024085  | -1.73589293617321 |
| Si | 18.10460294935389 | 7.22578850323366  | -1.46272912605444 |
| Si | 20.00055719911534 | 8.67317251621400  | -1.17389674561585 |
| Si | 21.87646879604718 | 7.18528693215585  | -0.97372222668146 |
| Si | 21.13810619516537 | 4.95055674276443  | -1.13489661127800 |
| Si | 18.80598490793369 | 4.96762285113525  | -1.42608669994372 |
| Si | 18.11935738347266 | 2.73408040157597  | -1.63987746702880 |
| Si | 19.96740423774751 | 1.25276454637558  | -1.45901403216000 |
| Si | 24.15180454830353 | 7.78075707586770  | -0.64970029521127 |
| Si | 31.34821823916415 | -1.48470694840285 | 0.88052619490399  |
| Si | 23.04100782016420 | -6.65947676859620 | 0.51616929352299  |
| Si | 21.09434787107588 | -5.25695809591770 | 0.72406212091426  |
| Si | 20.68393261537588 | -4.28561929369955 | -2.32421665900547 |
| Si | 18.54203527351769 | -3.86395211857600 | -1.28740422372188 |
| Si | 18.12983750768511 | -2.19967913695128 | -2.93725323034353 |
| Si | 15.96566834782234 | -1.88861357518577 | -2.11408210248256 |
| H  | 29.80136803552859 | 3.99494352641793  | 3.69428120921568  |
| H  | 29.41136139841526 | -4.25333314409812 | 3.91712344432347  |
| H  | 32.10573455137580 | 1.41723758019210  | 4.07587190321236  |
| H  | 26.21971519859231 | -6.17573177785632 | 3.71239366461769  |
| H  | 26.64590563897967 | 6.70733078037163  | 2.89165464729753  |
| H  | 18.88299910015067 | -9.04952228379818 | 2.47162154449343  |
| H  | 14.81989851815752 | -8.43894301960682 | 1.75604725961926  |
| H  | 12.26337938850030 | -5.95796493645960 | 1.17889815122142  |
| H  | 9.41505223510460  | -4.05021123077701 | 0.82607358572020  |
| H  | 6.89493611053241  | -1.62355257495267 | 0.52854971705288  |
| H  | 6.81517597249420  | 1.66291085253127  | 0.54028007122006  |
| H  | 9.18588636376764  | 4.20713234497680  | 0.90872459623388  |
| H  | 12.49764138261699 | 6.92268613716078  | 1.03118707827254  |
| H  | 15.13408726520434 | 9.15396951286940  | 1.41692810611518  |
| H  | 19.58794596070240 | 9.82101217225195  | 2.09994478318746  |
| H  | 24.06798704009917 | 9.02654715624027  | 2.56695473923884  |
| H  | 31.97987809453432 | -1.86959566737531 | 4.17027640650947  |
| H  | 23.37833269391071 | -8.47630995706735 | 3.36327888627989  |
| H  | 30.57252503858294 | 3.86412576606863  | -0.30194481768262 |
| H  | 30.18749277163473 | -4.39558228905339 | -0.09936804604883 |
| H  | 32.81187609759584 | 1.28268571731502  | 0.34158302162866  |
| H  | 22.45435872242314 | -2.03141563732627 | -3.52845546518043 |
| H  | 26.08708207293247 | -7.10862406873439 | -0.38447166542899 |
| H  | 27.17442366876105 | 6.71382168656247  | -0.94267145844045 |
| H  | 20.45361866220378 | -7.86523255002112 | -1.13895923735587 |
| H  | 16.08051017688613 | -8.41368005353747 | -2.14426684551944 |
| H  | 12.94723172965522 | -6.59055221922253 | -2.76378988191222 |
| H  | 9.62608859448645  | -4.02989456134056 | -3.26313478377398 |

|   |                   |                   |                   |
|---|-------------------|-------------------|-------------------|
| H | 7.13830457663602  | -1.55509946164038 | -3.27069965933478 |
| H | 7.08647835877776  | 1.69966851977156  | -3.23294534985097 |
| H | 9.37771196516238  | 4.29155297328205  | -3.16292296664504 |
| H | 12.96558117890822 | 7.07236632777029  | -2.83838752347725 |
| H | 15.64395719512187 | 9.19669071323397  | -2.55517497652897 |
| H | 20.11706200910000 | 9.91686078281839  | -1.99999255790219 |
| H | 24.67835632182020 | 8.97130034108456  | -1.39266133829630 |
| H | 32.68074628592610 | -1.99610011789885 | 0.41838816723626  |
| H | 22.61687324272896 | -7.75604467909656 | -0.41190618738599 |
| O | 20.10923635926268 | -4.03834631723869 | -4.10028344009983 |
| H | 20.77822094034587 | -3.54942394071310 | -4.62648007080141 |
| H | 19.16862803615551 | -3.31950400254947 | -4.03518136539437 |

- **TS10 (Hck-H-CH<sub>3</sub>-H<sub>2</sub>O → Hck-H<sub>2</sub>O-CH<sub>4</sub>)**

|    |                   |                   |                   |
|----|-------------------|-------------------|-------------------|
| C  | 20.87056969765533 | -5.21737606811643 | -3.00610394453043 |
| Si | 27.38330912482451 | 2.44664408587331  | 2.38167235206974  |
| Si | 27.19927165779959 | -2.13481840919427 | 2.46952360246701  |
| Si | 29.65457004541884 | 2.94356191997016  | 2.76200684476295  |
| Si | 29.34942594377548 | -3.00087705185991 | 2.86607179543649  |
| Si | 31.12702747531583 | 1.08598452143028  | 3.05712179244194  |
| Si | 19.81833275666122 | -1.00211404943996 | 1.15524727320187  |
| Si | 21.49290271593011 | 2.83075480974221  | 1.39291553594602  |
| Si | 21.24824500944777 | -1.96501742736644 | 2.74727271717798  |
| Si | 23.74789009523382 | 2.36672179000197  | 1.72693183246722  |
| Si | 23.31125254770362 | -1.94414861964662 | 1.72336748178407  |
| Si | 25.52837106273701 | 3.91912650030181  | 2.01191455524088  |
| Si | 25.37646314546410 | -5.65749262578188 | 2.44439361129175  |
| Si | 24.46383757228190 | 0.13272116113156  | 1.77040321960275  |
| Si | 25.63390053709491 | 6.30855451651842  | 2.01745247511784  |
| Si | 25.16756944777471 | -3.33568056510391 | 2.14003233721604  |
| Si | 26.75638508801221 | 0.16624722113050  | 2.30263286904975  |
| Si | 19.48075614049851 | -7.59871404229895 | 1.93217404241255  |
| Si | 17.67308447643712 | -6.06480677942242 | 1.72140409445605  |
| Si | 15.57239345201386 | -7.01631259014518 | 1.13656593806983  |
| Si | 13.86865938182856 | -5.42451844746858 | 0.58831402313729  |
| Si | 14.19322969906867 | -3.11556256671199 | 0.26489164726883  |
| Si | 12.17280933938100 | -1.88500152216369 | 0.04017439962145  |
| Si | 9.99654931870266  | -2.74941827456799 | -0.17362796958626 |
| Si | 8.29945734754638  | -1.07993174160769 | -0.38234816556858 |
| Si | 8.18505998611913  | 1.31640698031632  | -0.42080152233890 |
| Si | 9.67368781014754  | 3.17369133111809  | -0.26725418154788 |
| Si | 11.96973953542954 | 2.69593432012626  | -0.04041257159031 |
| Si | 12.65852208228254 | 0.41979015780934  | 0.06144747501217  |

|                      |                   |                   |
|----------------------|-------------------|-------------------|
| Si 14.99602247259440 | 0.45209083698424  | 0.35742749098767  |
| Si 15.60399385243843 | 2.70790709804775  | 0.38064588027385  |
| Si 13.79828220906710 | 4.22574962570933  | 0.15666255116256  |
| Si 13.79903614554916 | 6.61467008796664  | 0.15794590539616  |
| Si 15.64170852031486 | 8.13522842202817  | 0.42244360039832  |
| Si 17.87952301183500 | 7.41759976561423  | 0.77623357468697  |
| Si 19.78480625481024 | 8.84998416324082  | 1.08014429299614  |
| Si 21.64845622868940 | 7.36534967499510  | 1.39885387702436  |
| Si 20.91490543823145 | 5.11807403159615  | 1.29128034599744  |
| Si 18.61351510271511 | 5.17978161671919  | 0.89542474499434  |
| Si 17.86570524353590 | 2.96976457745083  | 0.77195877787582  |
| Si 19.60963927296607 | 1.38648699606048  | 1.08145303689959  |
| Si 23.92003060921753 | 7.97214077639799  | 1.73214234468777  |
| Si 31.02439977038570 | -1.31305937334765 | 3.10279005133887  |
| Si 23.46603008406355 | -7.08506196539195 | 2.39647039667093  |
| Si 21.29530727430209 | -6.10796592832113 | 2.36297280370444  |
| Si 20.28964068664086 | -4.02864081325850 | 2.69072419854230  |
| Si 17.98192154969634 | -4.08373848629911 | 2.99750020806222  |
| Si 18.06416030525307 | -2.60135796966313 | 1.14766080455313  |
| Si 16.06450390210592 | -1.67279795908320 | 0.33790042652125  |
| Si 27.80265612526050 | 2.39587474585137  | -0.01565543816872 |
| Si 27.61659898659756 | -2.22384338365960 | 0.07411231472454  |
| Si 30.07344476661417 | 2.88650450679340  | 0.38785663079874  |
| Si 29.77562851717074 | -3.06473507541527 | 0.48603221897400  |
| Si 31.53800601888654 | 1.02520618897333  | 0.70775510959251  |
| Si 20.27594177778527 | -0.84850879757284 | -1.20330366367240 |
| Si 21.92840283647493 | 2.86696033628061  | -0.99953980217370 |
| Si 22.01074447753602 | -2.11834163376539 | -2.22903083290558 |
| Si 24.16937805734229 | 2.34746999360055  | -0.65724163922513 |
| Si 23.77861769507827 | -1.99738707812866 | -0.67854189130706 |
| Si 25.95399024612040 | 3.89800837404069  | -0.36130203816172 |
| Si 25.71380122342842 | -5.85442611442657 | 0.07169835165120  |
| Si 24.86668220099108 | 0.10384054836352  | -0.60001309260462 |
| Si 26.02527198682235 | 6.29489691174487  | -0.36091812997043 |
| Si 25.60320776344372 | -3.49514702345012 | -0.22120118131017 |
| Si 27.15359665361926 | 0.09962943026219  | -0.07605650542449 |
| Si 19.85405259480231 | -7.45268791267361 | -0.41431564029149 |
| Si 18.01258132349355 | -5.97628020962519 | -0.66250428492326 |
| Si 16.02118103283101 | -7.06429533018795 | -1.22613461007648 |
| Si 14.16244691313888 | -5.68917321499204 | -1.78992974820723 |
| Si 14.38016920378428 | -3.32047260191934 | -2.10856346087080 |
| Si 12.41676080740768 | -1.95067980178777 | -2.37894503462904 |
| Si 10.22875953064578 | -2.78709982166347 | -2.58162005328226 |
| Si 8.54528000703553  | -1.10321619778362 | -2.75767987648930 |

|    |                   |                   |                   |
|----|-------------------|-------------------|-------------------|
| Si | 8.44477710872612  | 1.29610297416803  | -2.79219217691316 |
| Si | 9.91515568811674  | 3.17840423818170  | -2.66621139933581 |
| Si | 12.21793448135207 | 2.71035861478657  | -2.46174732163473 |
| Si | 12.80513537083778 | 0.40200191242979  | -2.35313204845180 |
| Si | 15.12359503003709 | 0.47931658413171  | -2.03864473593218 |
| Si | 15.90861731921222 | 2.68924757375020  | -2.01812192448353 |
| Si | 14.09229051311624 | 4.21957046943217  | -2.23683980024183 |
| Si | 14.13652087029395 | 6.61402255050449  | -2.22811974800090 |
| Si | 16.00332229362224 | 8.11590749100840  | -1.95854521920679 |
| Si | 18.25060981626411 | 7.40857023297205  | -1.61287879578495 |
| Si | 20.16166670181799 | 8.83902436260606  | -1.30268694635281 |
| Si | 22.02042443833708 | 7.34890044537981  | -0.99485409889241 |
| Si | 21.27074226512323 | 5.11511662336608  | -1.08761261480361 |
| Si | 18.96206975309349 | 5.15738431970758  | -1.49479099028210 |
| Si | 18.20514834467540 | 2.93852087625734  | -1.63796389619737 |
| Si | 20.05425984037830 | 1.47471266666047  | -1.29600918064046 |
| Si | 24.29256429530178 | 7.94479267420907  | -0.64612437885871 |
| Si | 31.44084854110469 | -1.37386267094595 | 0.75395853465548  |
| Si | 23.69839320082525 | -7.11611372972074 | 0.00889441707486  |
| Si | 21.65541869222439 | -5.96872388731024 | -0.01855399287370 |
| Si | 21.00218166112786 | -4.05143201940772 | -1.14594064281748 |
| Si | 18.69326895499465 | -3.78790301126364 | -0.84580766156119 |
| Si | 18.41989822886056 | -1.95355468109229 | -2.21380572335497 |
| Si | 16.13025316849342 | -1.65281998281313 | -2.11172205523545 |
| H  | 20.56574456758732 | -4.80837010898991 | -3.98836721078780 |
| H  | 21.79790930952555 | -5.80025756555327 | -3.12742555674714 |
| H  | 20.04421396897278 | -5.86515184682578 | -2.64976350032684 |
| H  | 29.99307281399433 | 4.10839845600321  | 3.64024248373857  |
| H  | 29.53233438656984 | -4.16947475756878 | 3.78495636576766  |
| H  | 32.26092636888188 | 1.48497223774900  | 3.95596227428847  |
| H  | 26.39787755109872 | -6.06006876889542 | 3.46375534714388  |
| H  | 26.69715565130776 | 6.84307193405569  | 2.93126847740178  |
| H  | 19.39681314225595 | -8.87389721713175 | 2.70842675582457  |
| H  | 14.95833401312869 | -8.16954405761585 | 1.87257055352546  |
| H  | 12.55243035068831 | -5.70821066221411 | 1.24685696077513  |
| H  | 9.58479237316443  | -3.93039904150283 | 0.64975803874158  |
| H  | 7.01264261448903  | -1.58117417055316 | 0.20432099131861  |
| H  | 6.84392335406867  | 1.69839808278563  | 0.13318826582942  |
| H  | 9.12058412146203  | 4.32116353667588  | 0.51948166121957  |
| H  | 12.54660495470443 | 7.21166822533874  | 0.72750580896713  |
| H  | 15.19553752219566 | 9.37413129333604  | 1.13840421820082  |
| H  | 19.64758377812341 | 10.08151312937866 | 1.92187830745272  |
| H  | 24.20748638578367 | 9.18181073108588  | 2.56881610190918  |
| H  | 32.10654386552900 | -1.78644268951699 | 4.02820209285583  |

|   |                   |                   |                   |
|---|-------------------|-------------------|-------------------|
| H | 23.61127927937358 | -8.31122833468442 | 3.24380512594700  |
| H | 30.71701584732290 | 4.00596367612694  | -0.37098271794193 |
| H | 30.26221761943430 | -4.27786514477816 | -0.24569156916157 |
| H | 32.91387819028713 | 1.38725304588728  | 0.22930653817254  |
| H | 26.85448592124586 | -6.59327132534209 | -0.56128959935116 |
| H | 27.31239586842289 | 6.85367024512182  | -0.89327026667413 |
| H | 20.04182733333075 | -8.55707945871737 | -1.40926561804001 |
| H | 16.24762011177814 | -8.29703731403027 | -2.04576911386261 |
| H | 13.17913583828929 | -6.39730200931540 | -2.67428953008986 |
| H | 9.96177008209875  | -3.99323245579907 | -3.42815895263128 |
| H | 7.39841940022078  | -1.60003738628111 | -3.58793444530367 |
| H | 7.25184839546554  | 1.65750995720774  | -3.62823684567026 |
| H | 9.47528997157635  | 4.31077664399914  | -3.54164227789413 |
| H | 13.11328868668926 | 7.25808712746528  | -3.11632334251060 |
| H | 15.79579579961145 | 9.34325189057932  | -2.79381055584816 |
| H | 20.32620792266670 | 10.06097763088533 | -2.15333268558465 |
| H | 24.81225500441182 | 9.14062224636239  | -1.38524936799852 |
| H | 32.77302867060614 | -1.87783707161417 | 0.28148525340336  |
| H | 23.67674496634831 | -8.35296515517317 | -0.83536872789039 |
| O | 19.25800887209078 | -2.18176615698308 | -3.97659289414811 |
| H | 19.05332031240278 | -3.02187503807954 | -4.43876654162367 |
| H | 20.27124223338368 | -2.14139582149922 | -3.83009675842955 |
| H | 21.39776162816313 | -3.82697727925654 | -2.78573459875298 |

- **TS1' (Hck-CO<sub>2</sub> → Hck-H-CO<sub>2</sub>)**

|    |                    |                   |                   |
|----|--------------------|-------------------|-------------------|
| Si | -7.83070408868863  | 2.39055339798264  | -1.27453886983298 |
| Si | -7.79836815989990  | -2.22255455401925 | -1.34631446882452 |
| Si | -10.10877925090220 | 2.98296756526658  | -1.33189083234016 |
| Si | -10.02531848193864 | -2.97813024627840 | -1.41322743784150 |
| Si | -11.66896671432361 | 1.17643900911029  | -1.39374688750776 |
| Si | -0.34347889399076  | -1.25987873547959 | -1.24206426332890 |
| Si | -1.83430345827371  | 2.57483021915677  | -1.16067913670294 |
| Si | -1.99422239220083  | -2.27778417568232 | -2.60188942062041 |
| Si | -4.13113056996163  | 2.20436727077521  | -1.16256814348666 |
| Si | -3.85647420327960  | -2.11942192755006 | -1.21185736206740 |
| Si | -5.89353882798032  | 3.80363856482526  | -1.18367356637209 |
| Si | -6.00596451567767  | -5.88235230438486 | -1.35083615249479 |
| Si | -4.93739953262380  | -0.00296226070782 | -1.10548728638044 |
| Si | -5.91618011319189  | 6.19613807749775  | -1.17124021348845 |
| Si | -5.79121613461426  | -3.52127190619776 | -1.26664282889986 |
| Si | -7.28088121051243  | 0.07997525711806  | -1.27149643636114 |
| Si | -0.11212526882317  | -7.93407277069783 | -1.36930768622606 |
| Si | 1.72724634704152   | -6.43449787980454 | -1.29207050092874 |

|    |                    |                   |                   |
|----|--------------------|-------------------|-------------------|
| Si | 3.88535431928579   | -7.39935900844147 | -1.43635889459956 |
| Si | 5.80554751284439   | -5.96441912411681 | -1.43638713224455 |
| Si | 5.72732319212199   | -3.58728799675510 | -1.36263912548751 |
| Si | 7.73812751039843   | -2.28306118709212 | -1.37020741093712 |
| Si | 9.95509331003609   | -3.07275737153551 | -1.41594435703701 |
| Si | 11.63744823523782  | -1.37770016587563 | -1.39094015097159 |
| Si | 11.73748246499013  | 1.02065977774662  | -1.33689807358913 |
| Si | 10.23116370762721  | 2.87332925542763  | -1.28149362795384 |
| Si | 7.93461866483159   | 2.34924171886470  | -1.26064492178368 |
| Si | 7.30075811480449   | 0.05063614999564  | -1.29336661864487 |
| Si | 4.95813043098114   | 0.13356956057733  | -1.28447249710668 |
| Si | 4.22749008596695   | 2.34868876625578  | -1.19801938690803 |
| Si | 6.06865618716798   | 3.86000308729525  | -1.19414439177382 |
| Si | 6.10799322430869   | 6.24635122551628  | -1.15741983421641 |
| Si | 4.24170471565561   | 7.76135614061656  | -1.12565471884895 |
| Si | 1.98283744373592   | 7.02659417072442  | -1.13307021073544 |
| Si | 0.08836895828028   | 8.49976523536980  | -1.11471186836388 |
| Si | -1.83422690528522  | 7.06146072331829  | -1.13074991421909 |
| Si | -1.12619881535955  | 4.81143723933652  | -1.13843187084582 |
| Si | 1.21308512047224   | 4.79122579984597  | -1.14194697516202 |
| Si | 1.90400712857101   | 2.54859380316570  | -1.18188230416537 |
| Si | 0.01612525432796   | 1.08478456608757  | -1.17013617683044 |
| Si | -4.09866918242047  | 7.76820664812388  | -1.13175267037210 |
| Si | -11.64963191515221 | -1.22485301603610 | -1.42901873837229 |
| Si | -4.10822954831453  | -7.32629630713956 | -1.37574366399269 |
| Si | -1.93235790335196  | -6.38258387508421 | -1.29946248181778 |
| Si | -1.09976704818729  | -4.30312425725183 | -1.93374580028597 |
| Si | 1.09873276078931   | -4.51853786410328 | -2.43395235214753 |
| Si | 1.66332873746670   | -2.59162747339215 | -1.26594178786018 |
| Si | 3.94659424617552   | -1.99175876081214 | -1.29404305923940 |
| Si | -7.89854349644816  | 2.37143274664849  | 1.15906751375564  |
| Si | -7.88741571402016  | -2.25466637132266 | 1.08797879540041  |
| Si | -10.18218107038371 | 2.95175096592192  | 1.07944627061928  |
| Si | -10.11369184535476 | -3.00843546014522 | 1.00298617882025  |
| Si | -11.74214537419938 | 1.14312645457994  | 0.99067232717943  |
| Si | -0.19267588305268  | -1.22739080657156 | 1.21085750635492  |
| Si | -1.85533095925885  | 2.56324325475995  | 1.27079011679854  |
| Si | -1.97545782739726  | -2.46539653675082 | 2.07753041252190  |
| Si | -4.16466495347370  | 2.22129263253300  | 1.25846583517188  |
| Si | -4.08809749210257  | -2.11663093205356 | 1.24813880487272  |
| Si | -5.95642387269042  | 3.79360505363460  | 1.22720917117609  |
| Si | -6.04564318859355  | -5.98093638176613 | 1.05192392825539  |
| Si | -5.00325190808684  | 0.03524633268650  | 1.29972669564240  |
| Si | -5.95343227792742  | 6.18493540014023  | 1.23941066457298  |



|    |                    |                   |                   |
|----|--------------------|-------------------|-------------------|
| Si | -5.91809848141265  | -3.61264325850266 | 1.13250420316471  |
| Si | -7.34025898935718  | 0.05573324396475  | 1.14202966189145  |
| Si | -0.10138700707624  | -8.11128041337597 | 1.01214205886848  |
| Si | 1.80953087019116   | -6.68742039939984 | 1.10416998365018  |
| Si | 3.99835965796438   | -7.54743607828372 | 0.95811135635362  |
| Si | 5.86650618769195   | -6.04445376232684 | 0.97323487275189  |
| Si | 5.78375758892831   | -3.66540254464486 | 1.03642147587532  |
| Si | 7.78235903792360   | -2.34262467559939 | 1.06589286932086  |
| Si | 9.99885613218918   | -3.12934699394834 | 0.99905292611030  |
| Si | 11.67789009942355  | -1.43157011109305 | 0.99585701682408  |
| Si | 11.77621930819577  | 0.96660924225623  | 1.04783401310874  |
| Si | 10.27327339851164  | 2.82177455319298  | 1.12922459202081  |
| Si | 7.97509505176896   | 2.30327473208061  | 1.17290874595992  |
| Si | 7.34966159483493   | -0.00135029120771 | 1.12350523282219  |
| Si | 5.00559391744935   | 0.09884294080998  | 1.13139833515338  |
| Si | 4.26245032924076   | 2.31259949544316  | 1.22852814214811  |
| Si | 6.10762756889188   | 3.81923536454477  | 1.21385798415804  |
| Si | 6.12162788338581   | 6.20818775487997  | 1.25015950978580  |
| Si | 4.25080451407067   | 7.72521477083433  | 1.28295526862114  |
| Si | 1.98522778357447   | 7.00803586310121  | 1.28769190261109  |
| Si | 0.08723641669928   | 8.48196362086154  | 1.29915330300574  |
| Si | -1.84004322370208  | 7.04315466961917  | 1.29214430976215  |
| Si | -1.11929287373914  | 4.79409353144605  | 1.26741652705347  |
| Si | 1.22217578617896   | 4.77167619877282  | 1.26887534078021  |
| Si | 1.93899621498352   | 2.53663943507471  | 1.25520561490649  |
| Si | 0.02918457952082   | 1.10909327753552  | 1.25363149376436  |
| Si | -4.11427057513736  | 7.73783534372506  | 1.27794099626965  |
| Si | -11.73589659073956 | -1.25744773516267 | 0.95630534679689  |
| Si | -4.17142460468531  | -7.47032818210532 | 1.01601113999357  |
| Si | -1.96971928345486  | -6.62890386265389 | 1.11657634509653  |
| Si | -1.15502870924242  | -4.66412671301252 | 1.99025188246559  |
| Si | 1.17602923160394   | -4.65574893053438 | 1.98134868178383  |
| Si | 1.76581694466717   | -2.59305868907181 | 1.12121126399717  |
| Si | 4.03901778123958   | -2.04511559949655 | 1.13212144662007  |
| C  | 0.68291718841457   | -4.54564655143212 | 3.88325582965355  |
| O  | -0.79849218851448  | -4.58978191084344 | 3.81068796598826  |
| O  | 1.20791462578455   | -4.39614356922694 | 4.94248164578296  |
| H  | -10.52483958017002 | 4.15608741447881  | -2.16409671170825 |
| H  | -10.39353749724268 | -4.14409478411768 | -2.27758783681629 |
| H  | -12.90702043665164 | 1.60525327894317  | -2.12524336340481 |
| H  | -7.13857482208147  | -6.39380887035392 | -2.18836234463278 |
| H  | -7.07437528983559  | 6.78052825039158  | -1.92432978938193 |
| H  | -0.17146003340535  | -9.06345142126342 | -2.34835603293277 |
| H  | 4.05600421226353   | -8.59112223303452 | -2.32718487618222 |

|   |                    |                   |                   |
|---|--------------------|-------------------|-------------------|
| H | 6.92636520999952   | -6.53758856914047 | -2.25101702564458 |
| H | 10.29828705958868  | -4.24312567382824 | -2.28449053655200 |
| H | 12.85370441296273  | -1.85140484724429 | -2.13103508134321 |
| H | 12.99662609602061  | 1.41875198694328  | -2.04953234031448 |
| H | 10.69219976719976  | 4.03871613834773  | -2.10070045583343 |
| H | 7.25802553386934   | 6.85517245368371  | -1.90278019733591 |
| H | 4.55361559336970   | 9.00697269924657  | -1.89843645559334 |
| H | 0.09833086682271   | 9.73200926854706  | -1.96628601595549 |
| H | -4.44039712124919  | 9.00026457312867  | -1.91341272914296 |
| H | -12.86703050558739 | -1.66415570175028 | -2.18806166024874 |
| H | -4.24250553588016  | -8.52505693391363 | -2.26186057936488 |
| H | -10.66597815457416 | 4.09736795971028  | 1.91357903851223  |
| H | -10.52522528911827 | -4.19706117864981 | 1.81545378776323  |
| H | -13.02076900878006 | 1.55918744785764  | 1.65711141268730  |
| H | -7.17812765714103  | -6.57051193735792 | 1.83762348942068  |
| H | -7.12025277031186  | 6.78849244980745  | 1.96381222094944  |
| H | -0.14407859415452  | -9.35648880357989 | 1.83897583447636  |
| H | 4.25770199330393   | -8.81982058262098 | 1.70285534461930  |
| H | 7.02233046418827   | -6.64787212197195 | 1.71411304804468  |
| H | 10.37247596959686  | -4.33755868800651 | 1.80075792189736  |
| H | 12.91818218672474  | -1.93610148400831 | 1.67295463091110  |
| H | 13.05812016397790  | 1.33225353155732  | 1.73696689552949  |
| H | 10.77383716076730  | 3.94749713190665  | 1.98012706401258  |
| H | 7.27172053493515   | 6.81034225339192  | 2.00123507996790  |
| H | 4.58233542969742   | 8.94345953646514  | 2.09073745383134  |
| H | 0.10572504080022   | 9.70021763090606  | 2.17076120739610  |
| H | -4.46844413152222  | 8.94953340275759  | 2.08588310230225  |
| H | -13.00458182822083 | -1.71200006573645 | 1.61567516850727  |
| H | -4.40694542795596  | -8.73798884545112 | 1.77624237948870  |
| H | -1.89034115718900  | -2.58054840346821 | 3.87042268364576  |
| H | -1.41506769645949  | -3.42941444265067 | 4.03788627258004  |

- **TS2' (Hck-H-CO<sub>2</sub> → Hck-CO-H<sub>2</sub>O)**

|    |                    |                   |                   |
|----|--------------------|-------------------|-------------------|
| Si | -7.81567634192895  | 2.37551282666428  | -1.22590325375717 |
| Si | -7.76946812032619  | -2.22801916254905 | -1.29624959930486 |
| Si | -10.10311928398762 | 2.94036811213797  | -1.23136555701172 |
| Si | -9.98691237954486  | -3.01400313552707 | -1.31624982440036 |
| Si | -11.65358921095508 | 1.12349513279537  | -1.25433699601101 |
| Si | -0.32065183954190  | -1.23537610325525 | -1.32509654029921 |
| Si | -1.81655629507090  | 2.60380923489700  | -1.22741263308326 |
| Si | -1.96401260280559  | -2.28508758312582 | -2.66860145624000 |
| Si | -4.11323279253236  | 2.21358755583124  | -1.21337333406548 |
| Si | -3.81651392979721  | -2.11540004437012 | -1.26973369445333 |

|    |                    |                   |                   |
|----|--------------------|-------------------|-------------------|
| Si | -5.88587474647776  | 3.80482125331769  | -1.18962029767790 |
| Si | -5.99272119657219  | -5.86014905740033 | -1.36796852620921 |
| Si | -4.88833261740891  | -0.00063397993132 | -1.21310305835197 |
| Si | -5.91461117715219  | 6.19781725335888  | -1.16441304119682 |
| Si | -5.75110934357586  | -3.50845575203354 | -1.27802928183862 |
| Si | -7.23567822094454  | 0.07143583819762  | -1.24432135983551 |
| Si | -0.10795809360911  | -7.90601880619288 | -1.42534559318281 |
| Si | 1.71085449902944   | -6.37146813155886 | -1.36656166336366 |
| Si | 3.85389417535696   | -7.38642768299241 | -1.40263898439083 |
| Si | 5.78892840360757   | -5.97092310161914 | -1.39378739729091 |
| Si | 5.68878484948841   | -3.59507464450320 | -1.33469552088247 |
| Si | 7.70123991605670   | -2.29568292018988 | -1.32225284286380 |
| Si | 9.90721568428506   | -3.11627582908661 | -1.33514556815969 |
| Si | 11.61179281579162  | -1.44436263593660 | -1.29718911983009 |
| Si | 11.73103585886292  | 0.95283129060574  | -1.25734496983475 |
| Si | 10.23960280379025  | 2.81818862089925  | -1.23466538078409 |
| Si | 7.93408014683555   | 2.32887466785756  | -1.24155598504635 |
| Si | 7.26605388171343   | 0.04009815452383  | -1.26907251237441 |
| Si | 4.92187075301532   | 0.13389675287016  | -1.29405152410779 |
| Si | 4.23189454477707   | 2.36402846009929  | -1.22996093075465 |
| Si | 6.08230281314667   | 3.86118893456523  | -1.20535093940661 |
| Si | 6.11998724776874   | 6.25052396891285  | -1.17470040185901 |
| Si | 4.25899201681742   | 7.77612557001239  | -1.15177200387341 |
| Si | 1.98972583026066   | 7.06847021195355  | -1.16386961063651 |
| Si | 0.09144059116185   | 8.54213507891379  | -1.13910721873382 |
| Si | -1.83175096857722  | 7.10139850035563  | -1.16135506343453 |
| Si | -1.12202523330926  | 4.84889901746152  | -1.18790491288771 |
| Si | 1.21658981302454   | 4.83605902486699  | -1.19675444337100 |
| Si | 1.91217198791688   | 2.59612583982545  | -1.24064269352467 |
| Si | 0.03995835821344   | 1.11313433835451  | -1.25275257744494 |
| Si | -4.10596708052752  | 7.78475563776547  | -1.14385954697679 |
| Si | -11.62714436300272 | -1.27763565717871 | -1.28822791524007 |
| Si | -4.09406684500622  | -7.30344071596342 | -1.43157967242508 |
| Si | -1.92063977564385  | -6.35517885352259 | -1.41406985217216 |
| Si | -1.05214599970269  | -4.29102852179537 | -2.06080017599876 |
| Si | 1.15167135286709   | -4.51946327548818 | -2.65497005722992 |
| Si | 1.64043063460230   | -2.64259248653909 | -1.35855660323204 |
| Si | 3.91158224785521   | -1.99774776255579 | -1.29065009258460 |
| Si | -7.83325949483460  | 2.35161752977774  | 1.20861214220188  |
| Si | -7.79092269657304  | -2.27063025866261 | 1.13931841721860  |
| Si | -10.12215866262267 | 2.91320556618068  | 1.18015810603360  |
| Si | -10.00989164121991 | -3.05173047372904 | 1.10077188764406  |
| Si | -11.66767535434851 | 1.09096518563842  | 1.13101727703464  |
| Si | -0.30292776948945  | -1.21761230076168 | 1.10598420484727  |

|    |                    |                   |                  |
|----|--------------------|-------------------|------------------|
| Si | -1.82539831735075  | 2.57736384893019  | 1.20296585632192 |
| Si | -1.92362679292611  | -2.32927285774315 | 2.39040743433172 |
| Si | -4.12370828675352  | 2.19184612929939  | 1.21038827496800 |
| Si | -3.89227982112358  | -2.13696750991626 | 1.16585317869421 |
| Si | -5.89930757592662  | 3.78183510926211  | 1.22210415323492 |
| Si | -5.99074625225798  | -5.94285193438252 | 1.03563618535203 |
| Si | -4.92442465978166  | -0.01238521869925 | 1.19062847242500 |
| Si | -5.92024733605196  | 6.17487224425660  | 1.24521365931454 |
| Si | -5.78369798633223  | -3.58026565463006 | 1.12579074433475 |
| Si | -7.26921491803216  | 0.04008854306046  | 1.17077503053547 |
| Si | -0.12952308875399  | -8.06381337003062 | 0.95558538654890 |
| Si | 1.75640388548031   | -6.63321739052622 | 1.03362791584813 |
| Si | 3.94536193917244   | -7.49279450799398 | 0.99470341660104 |
| Si | 5.83422660924413   | -6.02935389887936 | 1.01679016247381 |
| Si | 5.71582805584340   | -3.65649355492233 | 1.06213682699303 |
| Si | 7.71513940883025   | -2.33818761632548 | 1.11264532017542 |
| Si | 9.91921987967322   | -3.15978999385484 | 1.08138498322903 |
| Si | 11.61918006410839  | -1.48271952995064 | 1.09088708830793 |
| Si | 11.73802375726234  | 0.91473686731041  | 1.12791600321794 |
| Si | 10.25057438020281  | 2.78315932507592  | 1.17648656325410 |
| Si | 7.94480170788057   | 2.29643444528608  | 1.19301163551623 |
| Si | 7.29278027508075   | 0.00161811133416  | 1.14701973237690 |
| Si | 4.94768407042874   | 0.10925399159612  | 1.11750760787979 |
| Si | 4.24298282870434   | 2.33489630999395  | 1.19642761700650 |
| Si | 6.09324583289069   | 3.83097256838626  | 1.20298064227464 |
| Si | 6.12560281740412   | 6.22047901481641  | 1.23338492925174 |
| Si | 4.26201626332882   | 7.74343475416204  | 1.25693610319873 |
| Si | 1.99256285486679   | 7.03618875566014  | 1.25455682826615 |
| Si | 0.09387041385912   | 8.50969433509883  | 1.27339424867530 |
| Si | -1.83068799418271  | 7.07021765220072  | 1.26116881765500 |
| Si | -1.12067063982481  | 4.81847978801927  | 1.21772470181567 |
| Si | 1.21839784742222   | 4.80399061766681  | 1.21568303424421 |
| Si | 1.92481294733721   | 2.56688894853972  | 1.19573933716801 |
| Si | 0.04096556944526   | 1.10873557647426  | 1.17030450788595 |
| Si | -4.10530307180131  | 7.75489207333560  | 1.26421368842359 |
| Si | -11.64478615748432 | -1.31048898277841 | 1.09807317837566 |
| Si | -4.11256116879323  | -7.42325046683901 | 0.95819531362201 |
| Si | -1.92973959132254  | -6.52005217103355 | 0.99944026012309 |
| Si | -1.33265436554764  | -4.56047653217144 | 2.09086253408355 |
| Si | 1.04164908786209   | -4.60372388098915 | 1.91307029290559 |
| Si | 1.67899786813500   | -2.53442730084312 | 1.03909081982584 |
| Si | 3.96722732854989   | -2.03935766591288 | 1.13282850065749 |
| C  | 1.53319854003829   | -4.56054814277670 | 3.69803518780338 |
| O  | -1.66631185984277  | -4.75493848487376 | 3.93563447537934 |

|   |                    |                   |                   |
|---|--------------------|-------------------|-------------------|
| O | 1.87833572513206   | -4.50172348467371 | 4.79778189876428  |
| H | -10.55239830573225 | 4.10761909997755  | -2.05501640774341 |
| H | -10.35695008821974 | -4.18220578088555 | -2.17745295400755 |
| H | -12.91191709665756 | 1.54840229377856  | -1.95342664398669 |
| H | -7.13183983892812  | -6.37665689103202 | -2.19384005222471 |
| H | -7.08321945077231  | 6.78657600132993  | -1.89839799284495 |
| H | -0.12040203934318  | -9.05789875712993 | -2.37811283698778 |
| H | 4.03199634602978   | -8.60588222113118 | -2.25377062397960 |
| H | 6.91275167790252   | -6.54968960051250 | -2.20014988943388 |
| H | 10.24675739459629  | -4.29729084378343 | -2.19086189507807 |
| H | 12.83158190247253  | -1.93685091642309 | -2.01893536883747 |
| H | 13.00327374396182  | 1.33508468160618  | -1.95529773963861 |
| H | 10.72818274076083  | 3.97278690252327  | -2.05323775782887 |
| H | 7.27493401200772   | 6.85849181929141  | -1.91354034802978 |
| H | 4.59318313745463   | 9.01698076233949  | -1.92341396713428 |
| H | 0.10620122127742   | 9.78022257239488  | -1.98253268436233 |
| H | -4.46729383520441  | 9.01274107025793  | -1.92361406215082 |
| H | -12.86349393982558 | -1.72394981954534 | -2.01204189936374 |
| H | -4.23895565182861  | -8.51244019285197 | -2.30180779311294 |
| H | -10.59771054081824 | 4.05666158463641  | 2.02242616246910  |
| H | -10.39982673499691 | -4.24392322780359 | 1.91975826861475  |
| H | -12.93487847128700 | 1.49492492125955  | 1.82677274941922  |
| H | -7.10298942139870  | -6.53582833882106 | 1.84881911789837  |
| H | -7.08842160999867  | 6.75600542452839  | 1.98606034450801  |
| H | -0.18107174394775  | -9.28074298992398 | 1.82365120280304  |
| H | 4.12820243343572   | -8.75579533354727 | 1.77767208877109  |
| H | 6.96572209163660   | -6.63721264383872 | 1.79103111256119  |
| H | 10.26680849655151  | -4.36827554542859 | 1.89487035197475  |
| H | 12.84308989494926  | -1.99709688252636 | 1.79020179159229  |
| H | 13.01457708158643  | 1.27194968966409  | 1.83142189280376  |
| H | 10.75322705866058  | 3.90995354285154  | 2.02486078177732  |
| H | 7.28126013386072   | 6.81301778798862  | 1.98367656127571  |
| H | 4.59614107893006   | 8.96262345881554  | 2.06246702301213  |
| H | 0.11125514588228   | 9.72420158052770  | 2.15046636343014  |
| H | -4.46021279119398  | 8.96420515395996  | 2.07553679125284  |
| H | -12.89244014531688 | -1.77254648563422 | 1.79217385859368  |
| H | -4.26991031182506  | -8.69019087998551 | 1.74217151341080  |
| H | -1.88508617964499  | -3.53193140725595 | 3.90898755912946  |
| H | -2.47829661826637  | -5.26230213086129 | 4.15781602476165  |

- **TS3' (Hck-CO → Hck-HCO-H)**

|    |                   |                   |                  |
|----|-------------------|-------------------|------------------|
| Si | 23.02498747635740 | -3.35792277764018 | 4.30974485038770 |
| Si | 23.02044902716309 | -7.99698087448726 | 4.67926666578721 |

|                      |                    |                  |
|----------------------|--------------------|------------------|
| Si 25.25294709510019 | -2.65821672334572  | 4.59175520060556 |
| Si 25.26095186657534 | -8.60141342050131  | 5.08420470663230 |
| Si 26.83069780004395 | -4.40539109903106  | 4.98776044361855 |
| Si 15.22210525584637 | -6.66159470896139  | 3.08950006099319 |
| Si 17.09507815111285 | -3.05591288949227  | 3.30684895509998 |
| Si 17.13407399890617 | -8.06307035132234  | 3.46902047775171 |
| Si 19.35006083361783 | -3.53544794017020  | 3.70176912829143 |
| Si 19.37332197412704 | -7.88404339606060  | 4.08748067042380 |
| Si 21.12666475804005 | -1.95829744728800  | 3.85249286126135 |
| Si 21.04730974143439 | -11.84706089474581 | 4.62049506216348 |
| Si 20.22193676987743 | -5.70687949716582  | 3.94674858089702 |
| Si 21.23801846570878 | 0.42231367358829   | 3.68046140313167 |
| Si 21.12988833398914 | -9.46535190679384  | 4.43792684326737 |
| Si 22.51843335265194 | -5.68124213654282  | 4.40723957742709 |
| Si 14.99925476421640 | -13.86794721321289 | 3.79120502720649 |
| Si 13.16177092048022 | -12.38070874522509 | 3.37758362071701 |
| Si 10.89783163266635 | -13.04061823944575 | 3.09505819560475 |
| Si 9.11247983536026  | -11.47756934597836 | 2.70651940620032 |
| Si 9.17402870431011  | -9.09631587796202  | 2.52972920497762 |
| Si 7.26901526627917  | -7.67173450696922  | 2.18364757700308 |
| Si 5.03081547358071  | -8.34805610687945  | 1.90314201711201 |
| Si 3.45282119406528  | -6.59122826865826  | 1.54635450495673 |
| Si 3.45976030112973  | -4.19641368500084  | 1.37323659727403 |
| Si 5.04278158745741  | -2.41312341015397  | 1.48058078932686 |
| Si 7.28320397761817  | -3.03842098032153  | 1.85610868837168 |
| Si 7.80477638962894  | -5.35285799680970  | 2.08593110905086 |
| Si 10.13331536025999 | -5.34768162644987  | 2.35919891390718 |
| Si 10.96954091610258 | -3.15918683392939  | 2.38326225375931 |
| Si 9.20883719926520  | -1.60536164706854  | 2.01037165553348 |
| Si 9.32451260077300  | 0.77788508834081   | 1.86115506171745 |
| Si 11.22452614218266 | 2.24720227223153   | 2.03771740964702 |
| Si 13.45586583736049 | 1.51659677532048   | 2.42431123169569 |
| Si 15.40201384844409 | 2.91626887025882   | 2.60929754326101 |
| Si 17.24206297035141 | 1.42268493280979   | 2.99730354451163 |
| Si 16.47016845396899 | -0.80668597330779  | 3.02917227963545 |
| Si 14.15162783163751 | -0.72602980910306  | 2.65690490578909 |
| Si 13.27273306109345 | -2.89952598085778  | 2.69586633753131 |
| Si 15.10589493072575 | -4.33987065915407  | 3.18103564606827 |
| Si 19.51138814634138 | 2.05005921269467   | 3.28773753028880 |
| Si 26.82536727992195 | -6.79842389559865  | 5.19122068770783 |
| Si 19.13567590682347 | -13.28584274185840 | 4.40050668215648 |
| Si 16.94995913097800 | -12.47840799181194 | 3.94286462194992 |
| Si 16.27837047836901 | -10.23150484414331 | 3.66391206186792 |
| Si 13.96209071300605 | -10.16671988193002 | 3.30199226277182 |

|    |                   |                    |                   |
|----|-------------------|--------------------|-------------------|
| Si | 13.24112237177770 | -7.94962585726115  | 3.03652275745626  |
| Si | 10.96527792440267 | -7.52929402221769  | 2.64176097306845  |
| Si | 23.39814244250065 | -3.56414388340413  | 1.91096719295960  |
| Si | 23.42371059631679 | -8.17726137339572  | 2.28377592050516  |
| Si | 25.62962540157969 | -2.87488422398920  | 2.21860738528246  |
| Si | 25.65973876853339 | -8.78303051945184  | 2.71484938713132  |
| Si | 27.22022364693217 | -4.60515602628215  | 2.64159077328554  |
| Si | 15.55912246088535 | -6.85874784227241  | 0.60133028515709  |
| Si | 17.45034075571802 | -3.24639523551623  | 0.91327827498518  |
| Si | 17.52336309208000 | -8.31000701648980  | 1.02147636624066  |
| Si | 19.71715585415547 | -3.72718039044323  | 1.29258811009694  |
| Si | 19.75756397942583 | -8.13291724571667  | 1.70442806787815  |
| Si | 21.50051022410808 | -2.15144350580503  | 1.48677070808577  |
| Si | 21.44642501874333 | -12.03011799478560 | 2.24937213145803  |
| Si | 20.53692037192299 | -5.91785633123511  | 1.56873308984629  |
| Si | 21.60269698711354 | 0.23206146955036   | 1.30749549503614  |
| Si | 21.54566478473371 | -9.65330000393623  | 2.08393204276570  |
| Si | 22.84027937061511 | -5.88019907065149  | 2.00863040391018  |
| Si | 15.36561555933395 | -14.09508010240977 | 1.41663700009262  |
| Si | 13.52816563661663 | -12.59680958061448 | 0.99398581154929  |
| Si | 11.25396031090151 | -13.23053934335242 | 0.71756506115397  |
| Si | 9.46587742228357  | -11.65945001902866 | 0.32948758575105  |
| Si | 9.49610422213207  | -9.27347205035307  | 0.15610571550780  |
| Si | 7.60424264149084  | -7.83882377976073  | -0.22665979063031 |
| Si | 5.36200314333855  | -8.51374719204924  | -0.47964936260264 |
| Si | 3.77709398722072  | -6.76068046988100  | -0.81199311745335 |
| Si | 3.79316268696015  | -4.36656518375554  | -0.98306917454568 |
| Si | 5.38509006390357  | -2.58841405992362  | -0.89900331434677 |
| Si | 7.63252396611857  | -3.20992958957063  | -0.54970152131848 |
| Si | 8.17481508355540  | -5.52301847580617  | -0.30646011436619 |
| Si | 10.49901475146293 | -5.52808529265185  | -0.01353614163148 |
| Si | 11.31944864569203 | -3.33211255319393  | -0.02069776949463 |
| Si | 9.55422630318006  | -1.77163371238953  | -0.36523342565183 |
| Si | 9.67315665836013  | 0.61200712067111   | -0.51581740998087 |
| Si | 11.57755736078669 | 2.07805110739521   | -0.34195050569534 |
| Si | 13.81204765752362 | 1.34997994042264   | 0.04013946583292  |
| Si | 15.76132689062942 | 2.74637545536114   | 0.22852781778368  |
| Si | 17.59923195816186 | 1.24397663603829   | 0.60761751038784  |
| Si | 16.81712279499193 | -0.98651254119300  | 0.65856398730733  |
| Si | 14.50121066261673 | -0.89159173153460  | 0.27764982201160  |
| Si | 13.61927524267421 | -3.05778895719608  | 0.29147028659721  |
| Si | 15.42938272107762 | -4.51603236457043  | 0.77957711250413  |
| Si | 19.87193299955543 | 1.86012560443130   | 0.91166293806198  |
| Si | 27.23306147976737 | -6.99529172333112  | 2.84878276114066  |

|    |                   |                    |                   |
|----|-------------------|--------------------|-------------------|
| Si | 19.53166702626538 | -13.47676468592943 | 2.03000462923837  |
| Si | 17.32298323933895 | -12.70867507242380 | 1.57129552816237  |
| Si | 16.64055388593930 | -10.45982034624140 | 1.29587485110113  |
| Si | 14.32010969295432 | -10.37527300769949 | 0.93298843531568  |
| Si | 13.57004913377440 | -8.15650797661343  | 0.64303155422501  |
| Si | 11.30179776975118 | -7.72451043047000  | 0.24453789676933  |
| H  | 25.52734776186050 | -1.41193202249811  | 5.37500921137218  |
| H  | 25.54927052990154 | -9.69162726532422  | 6.06906360389364  |
| H  | 27.95000890190473 | -3.90046927460892  | 5.85021657870066  |
| H  | 22.02575637870258 | -12.43649799110007 | 5.59257678181755  |
| H  | 22.30822965363938 | 1.02409920358863   | 4.54251117081463  |
| H  | 14.83881507717610 | -15.00435485337829 | 4.75425674841261  |
| H  | 10.42201838296533 | -14.20072505723508 | 3.91628638116656  |
| H  | 7.84070501073603  | -12.00231927851707 | 3.30446772516956  |
| H  | 4.50138845339231  | -9.45970366311419  | 2.75502186685924  |
| H  | 2.11860799994316  | -6.98659265268413  | 2.10759730521709  |
| H  | 2.12438093545291  | -3.72006534183167  | 1.86455221387718  |
| H  | 4.51769085717467  | -1.18811148935195  | 2.16252660444574  |
| H  | 8.10259167796326  | 1.47754195619084   | 2.37805715883016  |
| H  | 10.81699137641686 | 3.54239566961306   | 2.67280762808226  |
| H  | 15.32068580393169 | 4.20041228521884   | 3.37636897019106  |
| H  | 19.78665711794820 | 3.31900419697889   | 4.03594635639383  |
| H  | 27.93777092487961 | -7.15691587580412  | 6.13244705628771  |
| H  | 19.24629239695575 | -14.46760995323182 | 5.31571032409461  |
| H  | 26.16345464086709 | -1.77687741740618  | 1.35157691691885  |
| H  | 26.19854891145039 | -10.00927831545842 | 2.04594866148449  |
| H  | 28.56330218340207 | -4.19698663128061  | 2.11128984607200  |
| H  | 22.67006818350395 | -12.74158595089547 | 1.75345129565298  |
| H  | 22.88941608937660 | 0.73080392195272   | 0.71862446876722  |
| H  | 15.43505581632141 | -15.39632849274241 | 0.67728280442583  |
| H  | 10.98309499203762 | -14.50867453478954 | -0.01745044239286 |
| H  | 8.41701497787058  | -12.31464429609133 | -0.52016526703932 |
| H  | 5.07412938969613  | -9.74393497611277  | -1.28300556730072 |
| H  | 2.63543069864035  | -7.25502443865431  | -1.65077153998660 |
| H  | 2.65758768140754  | -3.98265390323302  | -1.88567413058871 |
| H  | 5.09382253229693  | -1.48544980479477  | -1.86871114333510 |
| H  | 8.66656173523441  | 1.21496818002807   | -1.45032844433013 |
| H  | 11.39422825966952 | 3.26419305642368   | -1.24009462797080 |
| H  | 15.92911227640309 | 3.90892923810959   | -0.70117083721772 |
| H  | 20.39796409817036 | 3.00113997308617   | 0.09457083189018  |
| H  | 28.58503819509670 | -7.47042216769592  | 2.40395037694006  |
| H  | 19.94798825551998 | -14.77573746473228 | 1.40814607794904  |
| C  | 15.97366497156777 | -6.90484932181836  | -1.48929509091669 |
| O  | 15.48080098432163 | -6.38059965701708  | -2.41125203929720 |



|   |                   |                   |                   |
|---|-------------------|-------------------|-------------------|
| H | 17.15375804906923 | -7.72247010205898 | -1.40626063407123 |
| H | 17.74859643227713 | -8.12373553666769 | -0.74418754454584 |

- **TS4' (Hck-HCO-H → Hck-CH<sub>2</sub>O)**

|    |                   |                    |                  |
|----|-------------------|--------------------|------------------|
| Si | 22.97517763902816 | -3.29880363519759  | 4.39709527436728 |
| Si | 22.69766926676217 | -7.92841777749961  | 4.74195071672389 |
| Si | 25.26786035023741 | -2.82104185138253  | 4.64952525030311 |
| Si | 24.86527017434694 | -8.76947056599444  | 5.08878984093750 |
| Si | 26.70648326943396 | -4.69873441491077  | 4.99092272287835 |
| Si | 15.14311924032290 | -6.66886873465172  | 4.19872046747468 |
| Si | 17.02581476028774 | -3.00843021386616  | 3.49488735038318 |
| Si | 16.74352111161825 | -8.04917831486638  | 4.95916767517981 |
| Si | 19.30333310149097 | -3.33040233244578  | 3.86847358625901 |
| Si | 18.88679326371659 | -7.60089209446537  | 4.18387563157138 |
| Si | 21.13064936670259 | -1.81154967043778  | 3.98935327149966 |
| Si | 20.75706472015620 | -11.53549476352959 | 4.69303522233246 |
| Si | 20.03962223424917 | -5.54213611324890  | 4.06216102235400 |
| Si | 21.20047118072040 | 0.56982831628676   | 3.79371307539842 |
| Si | 20.66337507523063 | -9.16498577647052  | 4.50641101371290 |
| Si | 22.34291945067364 | -5.59500978966614  | 4.49687644147705 |
| Si | 14.90017542205098 | -13.72331051141142 | 3.90905755295585 |
| Si | 13.03643162052438 | -12.28907476084995 | 3.51409167139761 |
| Si | 10.81275677150926 | -13.06749215721692 | 3.26343796817872 |
| Si | 9.03341026134394  | -11.51410005819803 | 2.87814547237387 |
| Si | 9.27460910693240  | -9.15376510789060  | 2.73629957001014 |
| Si | 7.35986559743079  | -7.76847625735520  | 2.33961691870485 |
| Si | 5.13431845383429  | -8.47043613118908  | 2.04053118233574 |
| Si | 3.56905545410461  | -6.70647642903832  | 1.65453845499510 |
| Si | 3.57774213799969  | -4.31111941227885  | 1.47900383722080 |
| Si | 5.13626117664386  | -2.50640441638746  | 1.61175031744622 |
| Si | 7.37372914531854  | -3.11672688527341  | 2.01624592032560 |
| Si | 7.86975768937846  | -5.43963745342326  | 2.25982462060187 |
| Si | 10.15912326751998 | -5.42164710480459  | 2.71956785853884 |
| Si | 11.04134343155886 | -3.26714919841752  | 2.64192022616667 |
| Si | 9.29445105314965  | -1.69267346292030  | 2.22410594579622 |
| Si | 9.28718975172427  | 0.68727659612999   | 2.03824603197024 |
| Si | 11.14254662793174 | 2.21116680763831   | 2.20295787788254 |
| Si | 13.35552320703991 | 1.45305346000513   | 2.60451350082794 |
| Si | 15.27400412482698 | 2.88926706736824   | 2.74018875046474 |
| Si | 17.14246293432792 | 1.42903639804271   | 3.13621526798107 |
| Si | 16.34426329791526 | -0.78799647879425  | 3.21075611089050 |
| Si | 14.02812173330970 | -0.79761014472331  | 2.89084335814006 |
| Si | 13.33954976858941 | -3.04674514189450  | 3.01307120311313 |

|    |                   |                    |                   |
|----|-------------------|--------------------|-------------------|
| Si | 15.18479080208879 | -4.50240772078815  | 3.43605984590776  |
| Si | 19.40201749537524 | 2.11790859005811   | 3.40031080829762  |
| Si | 26.56219015019536 | -7.08963155920371  | 5.17022871739690  |
| Si | 18.91941608597245 | -13.05972346135269 | 4.50483488402167  |
| Si | 16.76070490348363 | -12.23032761756986 | 4.01772905257662  |
| Si | 16.17744091435562 | -9.96321139386304  | 3.76154843063740  |
| Si | 13.85798683899144 | -10.08199860509766 | 3.45074264784351  |
| Si | 13.36106710211328 | -7.81757051076567  | 3.27047280154465  |
| Si | 11.06635564642416 | -7.56421367820120  | 2.90005693325007  |
| Si | 23.29724130740098 | -3.50683829306382  | 1.99457766893764  |
| Si | 23.02887811898520 | -8.11099878587815  | 2.33502454447177  |
| Si | 25.58900396710691 | -3.02917478273142  | 2.26716371398260  |
| Si | 25.19261698593146 | -8.95803846068748  | 2.70116709637417  |
| Si | 27.03536818844856 | -4.89469836235009  | 2.63598911462960  |
| Si | 15.55175768415538 | -6.80804037451433  | -0.13536849719904 |
| Si | 17.34262033602105 | -3.23660644942329  | 1.09321630688137  |
| Si | 17.26618352123160 | -8.20780275660837  | 0.63780478107480  |
| Si | 19.61792630282072 | -3.52394945279601  | 1.48341745888734  |
| Si | 19.23261453564403 | -7.79946725911553  | 1.78643623539290  |
| Si | 21.45568116821586 | -2.01422189689858  | 1.60691269155510  |
| Si | 21.12617867762321 | -11.71935149937132 | 2.32225298052913  |
| Si | 20.32624577789692 | -5.73651942319091  | 1.66398985939380  |
| Si | 21.54136617214517 | 0.36641954148431   | 1.41607710242826  |
| Si | 20.99640007153523 | -9.35507210218992  | 2.13818282505418  |
| Si | 22.62523004430029 | -5.78990645317250  | 2.10429335146751  |
| Si | 15.24688828935468 | -13.94315833981503 | 1.53117108035607  |
| Si | 13.38594786543178 | -12.49313741488483 | 1.13207318511528  |
| Si | 11.16007683354689 | -13.26725142815602 | 0.88440991979107  |
| Si | 9.40083129553500  | -11.68490221797418 | 0.49983781124680  |
| Si | 9.63641043304988  | -9.32120943415144  | 0.37062479318067  |
| Si | 7.72342483480886  | -7.94323445267401  | -0.06018596733674 |
| Si | 5.49830970615077  | -8.64962724114364  | -0.33943861512858 |
| Si | 3.93584803355008  | -6.87849376844185  | -0.69736783146329 |
| Si | 3.95623825821732  | -4.48222868164438  | -0.86987203695993 |
| Si | 5.51525845377397  | -2.67285979191560  | -0.76563115544371 |
| Si | 7.75627818877268  | -3.28346465798334  | -0.38268651146243 |
| Si | 8.20562428093691  | -5.61236629959599  | -0.12893937888775 |
| Si | 10.50337505664182 | -5.61392577666224  | 0.31661169624444  |
| Si | 11.42062347874341 | -3.46706157302680  | 0.26120173003944  |
| Si | 9.68411504289777  | -1.87479241502963  | -0.14548556877485 |
| Si | 9.65011151230164  | 0.50290974445110   | -0.33528195985581 |
| Si | 11.49936901905239 | 2.02599160924511   | -0.17115764746888 |
| Si | 13.70261262719105 | 1.23799322464566   | 0.21605799630852  |
| Si | 15.61773873866631 | 2.67487132763274   | 0.36101255431117  |

|    |                   |                    |                   |
|----|-------------------|--------------------|-------------------|
| Si | 17.48764759523677 | 1.21690050395018   | 0.75264147099642  |
| Si | 16.68726060431629 | -1.00289537594324  | 0.82935355556541  |
| Si | 14.37204325536947 | -1.01069241566230  | 0.52286516797874  |
| Si | 13.72499713858047 | -3.27300265926668  | 0.63293837543780  |
| Si | 15.53451001176094 | -4.78027097167422  | 1.00566839700754  |
| Si | 19.74440448017083 | 1.91387028098009   | 1.02294794432647  |
| Si | 26.89413555915064 | -7.28506400631191  | 2.81438226696868  |
| Si | 19.33438223395957 | -13.29681022536387 | 2.14553288889458  |
| Si | 17.15984159659560 | -12.51789924395807 | 1.65167213193395  |
| Si | 16.53142463828967 | -10.28198232250249 | 1.34434917839606  |
| Si | 14.20500228875513 | -10.28057329314774 | 1.09743737707430  |
| Si | 13.75166650705535 | -7.99566737912660  | 0.81254502684628  |
| Si | 11.43705611428228 | -7.75626659859091  | 0.51465659601692  |
| C  | 17.54693005548953 | -7.02633149559116  | -1.63296343998228 |
| O  | 18.29506325614065 | -6.07865734834714  | -1.56596181931370 |
| H  | 25.67899692888288 | -1.61920288624519  | 5.44249182152558  |
| H  | 25.08763350635229 | -9.89050521447758  | 6.05628484606328  |
| H  | 27.88032112306604 | -4.28075892632044  | 5.82747035364949  |
| H  | 21.77089480724973 | -12.03622157264594 | 5.67843136518433  |
| H  | 22.25102486726120 | 1.22113340710968   | 4.64347661006512  |
| H  | 14.80495513866783 | -14.85831675685135 | 4.88249326061547  |
| H  | 10.38737291127332 | -14.22054592075761 | 4.12062666816234  |
| H  | 7.75472974469803  | -11.98884606723133 | 3.50058590975365  |
| H  | 4.59173778987327  | -9.57542282072787  | 2.89294495960727  |
| H  | 2.22286545941528  | -7.09925729584217  | 2.18868877403855  |
| H  | 2.22707104556004  | -3.84423446665453  | 1.93712179797211  |
| H  | 4.58546118988266  | -1.29003161510682  | 2.28916462631632  |
| H  | 8.04187626300375  | 1.34058369692279   | 2.55958551875658  |
| H  | 10.71864600160960 | 3.49374003807760   | 2.85214294020194  |
| H  | 15.18356718674592 | 4.18641007850455   | 3.48412791731624  |
| H  | 19.64507381952599 | 3.40559140276571   | 4.12794472261746  |
| H  | 27.67254428916038 | -7.52524005621008  | 6.08061959127638  |
| H  | 19.00418402111877 | -14.19873516655460 | 5.47467550515819  |
| H  | 26.20555593233884 | -1.96448300214687  | 1.41373773135601  |
| H  | 25.62235047734166 | -10.21458680359671 | 2.00939022578715  |
| H  | 28.39905001553384 | -4.58253161901813  | 2.09278051775096  |
| H  | 22.40268145447997 | -12.27581713775959 | 1.76484050311685  |
| H  | 22.80683153615711 | 0.88276302082745   | 0.79844170424418  |
| H  | 15.35000585421119 | -15.23350950207389 | 0.77734163942591  |
| H  | 10.93393471107565 | -14.54581894027806 | 0.13621170720395  |
| H  | 8.34899149757454  | -12.25899347085170 | -0.40147453258712 |
| H  | 5.20966157992347  | -9.87899012694303  | -1.14396406883269 |
| H  | 2.80380408197511  | -7.36279305910171  | -1.55513600053975 |
| H  | 2.82752420493374  | -4.11223831088830  | -1.78723752587290 |

|   |                   |                    |                   |
|---|-------------------|--------------------|-------------------|
| H | 5.21354667360245  | -1.57642135561674  | -1.73974386705705 |
| H | 8.62241076265464  | 1.02293550307342   | -1.29572411038846 |
| H | 11.33197982234833 | 3.18983131174962   | -1.10012035242402 |
| H | 15.75108920174337 | 3.81984148521011   | -0.59565912713518 |
| H | 20.21321545345181 | 3.06776215322883   | 0.18910652811537  |
| H | 28.19849444093840 | -7.84328309142161  | 2.32597342897077  |
| H | 19.77131619812808 | -14.57375088543062 | 1.49425275909037  |
| H | 17.06393677769171 | -7.49642216788109  | -2.51077433866993 |
| H | 17.90769348836651 | -8.13482710863509  | -0.93339324830185 |
